# Supplementary material for: Evolution and origin of vomeronasal-type odorant receptor gene repertoire in fishes
Source: PubMed Central journal article supplement (PMC1601972; doi:10.1186/1471-2148-6-76), 2006-10-03
Supplement: 1471-2148-6-76-S1.pdf [file 1471-2148-6-76-S1.pdf]

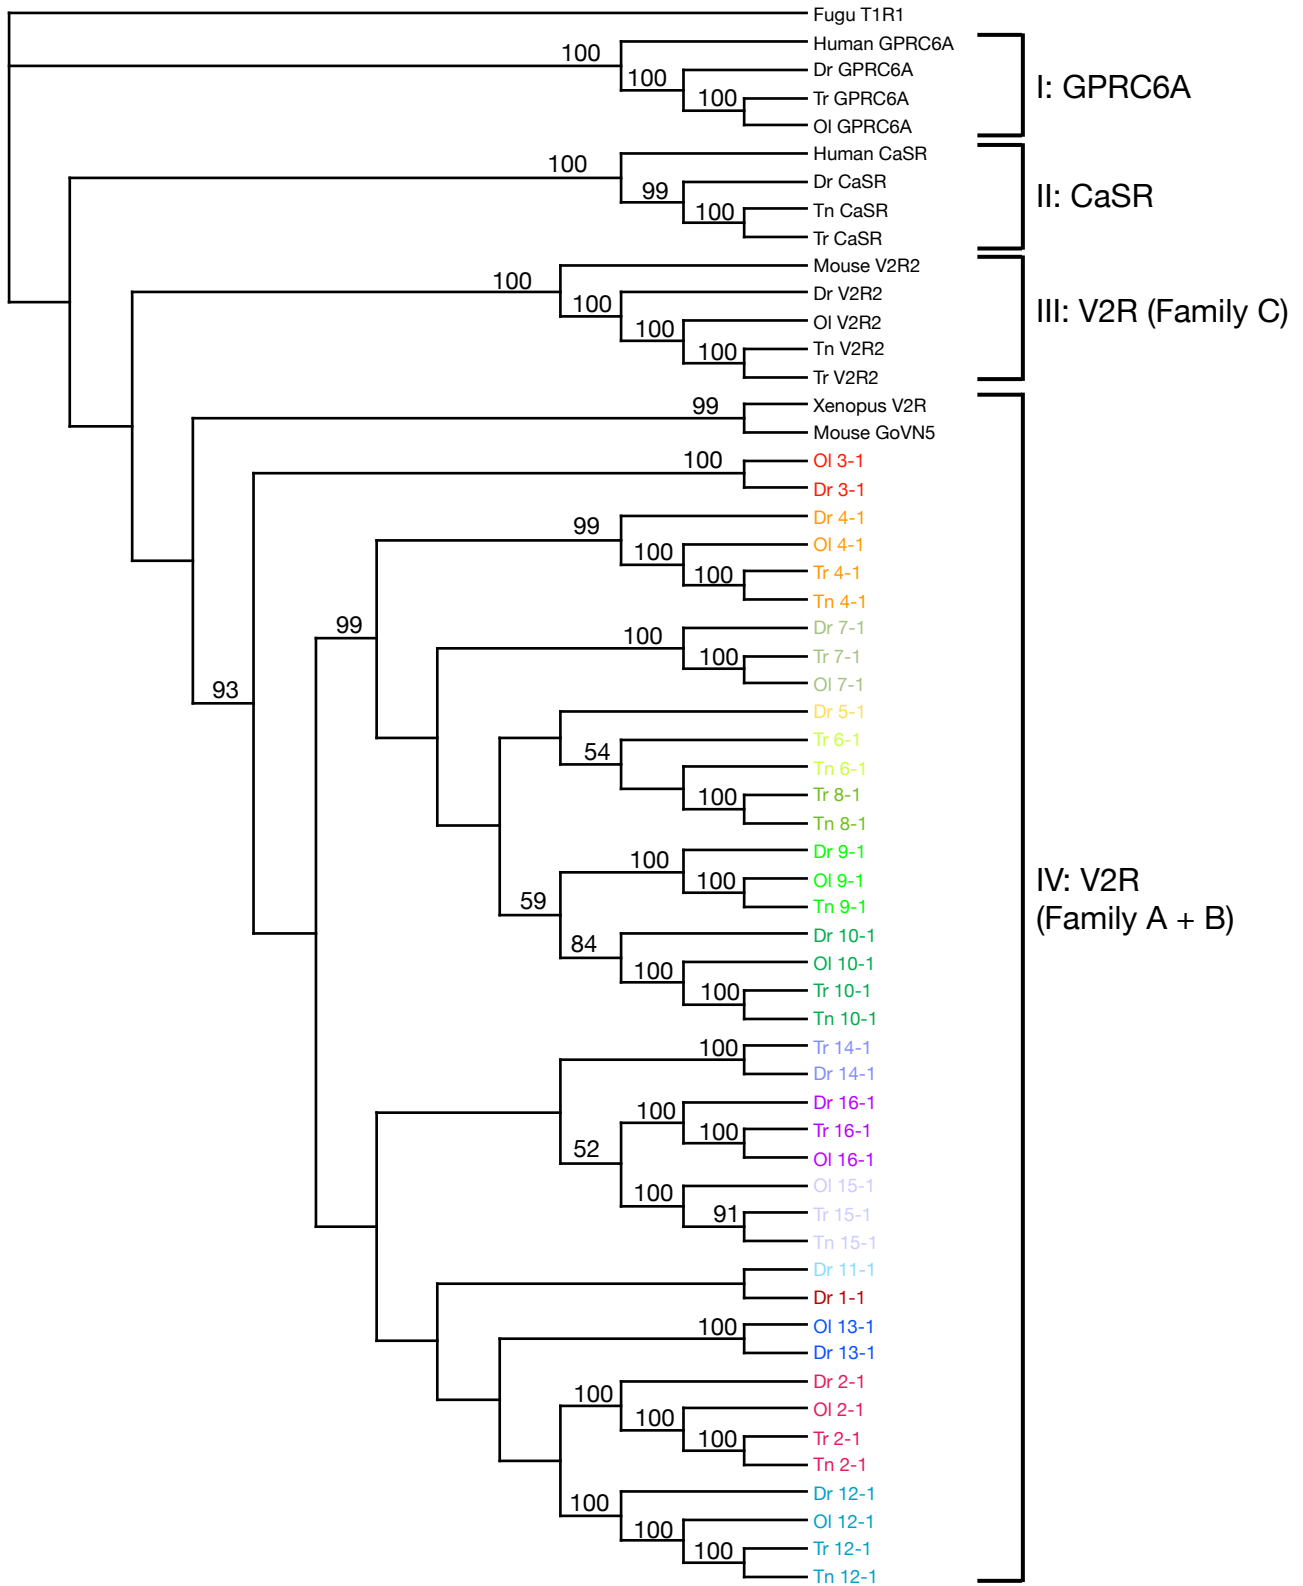

Additional file 1
