# Supplementary material for: Evolution and origin of vomeronasal-type odorant receptor gene repertoire in fishes
Source: PubMed Central journal article supplement (PMC1601972; doi:10.1186/1471-2148-6-76), 2006-10-03
Supplement: 1471-2148-6-76-S7.pdf [file 1471-2148-6-76-S7.pdf]

>Dr\_16\_17\_F

MWWILNISIYLIFNFIMSASILGSNTCQLOQGHFRLNEMYHDGDVILGGLFEVDFTVFPDLDFK  
TEPEPPYCVQFDMESFOQAQTMAFAIDEINKNPNULLPNITLGYHLFDNCVMLGMAFRAAISM  
ASGTEEFFNNINCTGPPPVIGIVGDSSTVSIASSILGLFRVPIVSHYATCSCLSDRKKYPSFFR  
TIPSDAFQVRAMVQILKYFRWTWVGLIYSDDDYGVYAAQSFOQEMQLFGGCVAFSEVLPHD  
NNLEDIKHITKMIQASTARVIVVFSTPSFLIPLIDELVLQNMTRQWIASEAWATSFVHHSRLL  
PFLKGTGLGAIIRGEIQGLYEFLLRLOPTNDPKNNMIRIFWEIMFGCNFETGGKKNSGDQVINI  
CTGOEDLRRTTKTPYTEVSELRASYNVYKAVYALAHALNDLMOCEDGRGPFVNSCADITNL  
KPWQLVHYLQNVNFTTDFGDHVSFDKNGDALAIYDVLNWQPSSDGSIRAQTVGVVNEEVAT  
GMVLTLEDEDALYWNFESKKNVNTPPSSVCSESCAPGTRLATIKGLPVCCFDCLPCGDGEISN  
ITGAVECTMCPDEFWSNLDKQOCIPKEVEFLSYEDPLGISLTTASLLGTCFCVLMFVFAVHR  
NTPIVRANSEL SLLLLSLKMCFLCALLFIGQPQLWTCQLRHVVFGISFVLCISSILVKTMMVI  
AVFKSSRPESKGAMKWFVAVQQRCTVLVLTAIQVVICAVWLSTASPAPHKNNQYIRSKIVYEC  
AIGSVAGFSMLLAYIGLLAAVSFLLAFLARNLPDNFNEAKFITFSMLIFCAVWIAFVPAYVSSPG  
KYAVAVEIFAILASSFGLLLAIFAPKCYIILLHPERNTKKAIMGKE

>Dr\_16\_18\_F

MWITLCIYLYLSLNYICAHSILRTSDSCRLQRRFHLNGMYKDGDVILGGLFQVHFFTVFPEQS  
FRTEPEPPFCEKFDMESFOQAQTMAFAIEEINKNPNULLPNITLGFHLYDNCVRLGMAFRAAIS  
LASGTEESFQNLNCTGPPPVIGIVGDPSSSTPSIAISSLLGLFRVPIVSYYATCSCLSDRKKYPSF  
FRTIPSDAFQVRAMVQILRHFGWTWVGLIYSDDDYGVYAAQSFHLEMQMFGHCVAFSEILP  
HNNNQORDIQRIMGVIOASTARVVVVFSTSSFLLPLIDEVASQNMTGRQWIASEAWATSPVYH  
SPRLLPFLGGTLGIAVRHGEIPGLHDFLLHLGPGNESRNNMLRIFWENMFGCSFEPGVKDT  
NSEIKLCTGOEDLSTTNTPYTDVSGLR AAYNVYKAVYALAHGLHDLMOCEKGRGPFREGESC  
ADITNLKPWQLVHYLQKNFTTGFGDHVSFDENGDALAIYDVLNWQPSSDGSIQIFTVGVK  
ERTETGMVLTIDEDAIYWNFETKKSPQSVCSSESCSPGTRRATR KGLPVCCFDCLPCRDEIS  
NTTDAIECMLCPDEFWSSPKDQCVPEVEFLSYEDPLGISLTTASLLGSCFCVLMIIIFGLH  
RNTPIVRANSEL SFMLLLSLKMCFLCVLLFIGRPQLWTCQLRHAVFGISFVLCISSILVKTMV  
VIAVFKSSRPEGKGAMKWFVAVQQRCTVLVLTVLQVVICSVWLSTASPTYKNNQYIRSKIVY  
ECAIGSVAGFSLLLGYIGLLAAVSFLLAFLARNLPDNFNEAKFITFSMLIFCAVWIAFVPAYVSS  
PGKYAVAVEIFAILASSFGLLVAIFAPKCYIILLHPERNTKNAIMGRE

>Dr\_5\_1\_F

DVTIGGIFSFHNSWEEIMPTFTSKPEQPKCKSLSLREFQNAQTMIYAIEEINKRADILPGLSLG  
YRIFDSCGSIEMALRASLSLVNGENASHLSCQRPKTVQAI AETSSTPTIAISATVGPLHLPVIS  
HFATCACLSDRKKHPSFFRTVPSDYYQSRALAKLVKYFGWTWVGALCSDNDYGNNGMNTF  
IKAATEFGVCVEFSEAFFRTHPREEILRIVDVVKSSSKVIVAFVSYSDMEVLLLELAKONITGL

QWIGSESWISDMNIATGKWQYILRGSMGFAIPKAEIQGLREFLIKIHPSSNIYLYKELWESVFO  
CRLSTEQSSESKSMCTGNESLNNVQNOYTDVTELOIANNVYKAVFAIAHALNSSVGCSSKWD  
TNQRECNTWQVLQALREVSFFTETGEKVFFDKNGDPAARYDLLNWQQGEEGATKFKVGVF  
YDASLOPEFQLSFNNITIMWAKNQHQVPVSVCSSESCPMGTRKAVKKGKPLCCYDCIQCAE  
GEISNKTDSVMCLKCPPEFWSNKWRDTCVPKLVEFLSFEDVMGIVLIIFSLLGVSFTLGIAIFF  
VHKDTPIVKANNSELSFLLLFSLTLCFLCSLTFIGRPTEWSCMLRHTAFGITFVLCISCVLGKTI  
VVLMAFKATLPGSNVMKWFGPLOQKLSVITFTLLOQVICVLWLTLSPPFPYMMNMYQERIL  
ECNLGSAFGFWAVLGYIGLL

ILCFILAFLARKLPDKFNEAKFITFSMLIFCAVWITFIPAYVSSPGKFTVAVEIFAILASSFALLFCIF  
APKCYIILLRPEENTKKHMMSKS

>Dr\_3\_1\_F

MKNFNILLFCSLLYVQTSSMCQLLRTFEMPNIFKVGDIMIGGIFPIFNKQENIIGSFERNMQRIK  
CTGFDLRAFRWIOSMMFAVDEINKNEELLPHISLGYKIMDSCASPTNVLRAVFSLVSEQKEQE  
FTSQCHLPLTALVAESGSSQSLAVAGMLGPFRVPMVSYFSTCACLSDRKKYPSFFRTIPSDF  
YQAKALASLVKQFGWTWIGALQSDNDYGRNGISAFTKEVEKMGVCIAFVGTILRTYPOSKITE  
VVEMIKESTVKVILAFVPEGDLYPLMKEVVNRNITGIQWIASEAWVTAARPSTPEMFKSFGGT  
VGFVVRKMAMMLKLRPYLENISPYSTQSAFVSDFWETVVGCKPCLNCEPSANSTLNGQMC  
TGQEKLTFTDKFFDVTQVRVTYNVYQAVYAIHAHAIHKVLYCOGDNLSKMCLNVSQITPKQVS  
DQLERNV FIDEYGENVFFDENGDPASYELINWQLNQGEVQHVTVGYFSKSPDGTYKLTIKE  
DNVHWSTENLIPKAVCSDTCPKGTRKAQIKGRPVCFCDCIPCADGSISNTTGAADCTLCPKE  
YWSNERRDKCLVKTIEFLSYTETMGIILTALSFLGASLTVATMIVFIHYRETPIVKANNSELSSLL  
LSSLFFCFLCPLTFIGEPHWSMCLRHTAFGLTFALCISCVLGKTIVVTAFRATLPGNKLSGK  
FGPVOQRAIVFLCTAIQIVICALWLLIKPPFPDKALRYDHKKIILECNTGSDAGFYAALGYVGLL  
STICLILAFGRKLPDNFNFAKFSMLIFCAVWITFIPAYISSPGKYTVAVEIFAILSSAFGLLL  
CIFAPKCFIILIKPERNTRKHVMGKS

>Dr\_9\_1\_F

MLLFYIFLHFTLIRTKAGNGLCQMMGDPKYPLFSKDGIDITIGALFAILSKETLPSFQFTQKPO  
LLSCSSVNLDRFRMTQIMIFAIEEINRSKSLLPNVSIGYRIYDTCGSRMSAMSATMALMNGPE  
FTADKICNGESPIHAIIGETESSATIILSKTTGPFKIPVISHSASCECLSNRKIYPSFFRTIASDYH  
QGRALAFIVKHFGWSWVGTVNSDNDYGNNVMAIFLNTAQKEGICVEYSVKFYRTEPEKLLK  
VVETIKKSTAKVIVAFVSLVEMGLLIDQLSIQNTGFQVIGGEGWITTKSLINSKSFHVLGGSLGF  
AFRKHIIIIEGFADYVIKTFWERDFPCLTNEGNYSOYALTCSSYQDLFTLKHYNEDIPEQRYASNV  
YKAVYAVAHSLHNLLKCKENEGCEKSLTMQPQQVWEALKNVNFTLKFGRVWFDSTGGAVA  
HYEVVNWQQSDSGSFQFKKVGDFDASLPPDQSFMLNNTKNIIWGGQLERPRSVCSSESCPP  
GTRKASQKGRPVCYDCIPCAEGEISNETDSVNCKQCQGEYWSNVEKNKCVLKAVEFLSFT

DFMGIVLVFFSLFGVGLTVLVAILFYSKKDTPIVKANNSELSFLLLLSLTLCFLCSLTFIGRPTEW  
SCMLRHTAFGITFVLCISCVLGKTIVVLMFAFKATLPGSNVMKWFPGVQORLSVLAFTLIQVLC  
VLWLTMSPPFPYKNMKYYYKEKIILECSLGSVIGFWAVLGYIGLLAALCFILAFARTLPDNFNE  
AKFITFSMLIFCAVWVTFIPAYVSSPGKYTVAVEIFAILASTFGLLFCIFVPKCHIIIFKPEQNTKO  
HMMGKN

>Dr\_9\_2\_F

MLFFLHTLPLLYQLNTNTPCQTMGDPKDPFLSKDGDVTIGGVFAIHRKETLPSFEFAQKPLPL  
SCSSVNLDRDFRLAQIMIFAIEEINKSKSLLPNIIYIGYRIYDTCGSRLSTMSATMAVLSGQEFRPR  
DRCNDQPPLHAILGESESSATVILSRTTGPFKVPVISPSATCECLSNRKDYPSFFRTIASDYHQ  
SRALAYIVKHFGWTWVGAVSSDNDYGNGMAIFOKIAQEEGICVEYSVKFYRTESDKLKKVV  
NEIKKGTAKVIVAFVSFVEMGLLIDQLSIQNTGFOLIGVESWITTKNYFTPNSFSSLRGS LGFA  
VRKINIEGFIDYVIKAFWDTAFPCTKTEGNSSQYSISCTRSEDLLELKNYTEDVLEQRYASNVY  
KAVYAVAHSLSHLLGCENQGLCDKNKPIRPOQMVEALQKVNFTIOMGDQVWFDSTGGTVA  
HYEVVNWQQDFDGSFQFKTVGYDASLPPOQRLMLNNTKNIIWAGGQQKPNVSCSESCP  
PGTRKAAQKGRPVCYDCIPCAEGEISNETDSINCKQCLEEYWSNAEKNKCVLKAVEFLSFT  
EIMGIVLVFFSLFGVGLTVLVFYRKKDTPIVKANNSELSFLLLFSLSLCSLTFIGRPTEWS  
CMLRHTVFGITFVLCISCVLGKTIVVLMFAFKATLPGSNVMKWFPGVQORLSVLAFTLIQIIICVV  
WITLSPFPYKNMEYYKEKIIIECNLSTLGFVAVLGYISLLSVLFCVLAFLARKLPDNFNEAK  
FITFSMLIFCAVWITFIPAYVSSPGKLTVAVEIFAILSSSFGLLFCIFAPKCYIILLKPEQNTKQHM  
MGKT

>Dr\_9\_3\_F

MLFLYTLFFFHHLHTKAGNTLCRIMGDPQYPLLSTDGDITIGALFPVHSTETLPSFEFTKQPO  
LLSCSSVYLDRDFRLAQILIFAIEEINRSVQLLPNISIGYRIYDTCGSROSTMSAIMGLMNGQEF  
GAGERCNGRSPHAIIGESESSATVILSRTTGPFKIPVISHSASCECLSNKKDYPSFFRTMASD  
YHQSRALAYLVKDLGWSWVGAVSSDNEYGNYGMSIFLKAQEVGICVEYYAKFYRTEAENLH  
KAVNMIKGTAKVIVAFVSLPEMGILVDQLSIENITGLQMIGVKS WITVKSFITPSSFHVLKGS  
GIAVKKISVEGFAEYAINFEWKKGFPCLKSEVNSSRYALSCSRYEDFLVLSISEDVPEQRYAS  
YVYKAVYAVAHSLSHSLFNCKEHEGCEKDLTIQPOQVVEALKKVKFTIKTGDHVVFDSTGAAV  
AOYDVVNQLQDSYGSTLFKSVGYYDASLPPEQQFVLNNTNIIWAGGEQKVRVSCSESCPPG  
TRKATQKGRPVCYDCIQCADGEISNETDSNNCKQCPEEYWPNTEKSKCVLKIVEFLSFTL  
MGIVLVIFSLFGVGLTVLVTFYRKKDTPIVKANNSELSFLLLFSLTLCFLCSLTFIGRPTEWSC  
MLRHTTFGITFVLCISCVLGKTIVVLMFAFRATIPGNMIMKWFPGVQORLSVLAFTLIQILICVWL  
TISPPFPKNIKYYYKEKIILECSLGSSTIGFWIVLGYIGLLAVLFCILAFARTLPDNFNEAKFITFSI  
LIFCAVWITFIPAYVSSPGKLTVAVEIFAILASSFGLLFCIFAPKCYIILFKPEQNTKQHIMGKT

>Dr\_9\_4\_F

MLLFYILLLLFHQLHTKAGNTQCRIMGDSTYPLISKNGDITIGALFPIHSTETLTSLKFTRKPQPI  
SCSSVNLRD FRLAEIMIFAIEEINKSESLLPNVTIGYQVYDTCGSRLSTMSAIMGLMNSOGFD  
AEDGCKGQTPIQAIIGDSESSATVILTRTTGPFKIPVISHSASCECLSNRNDYPSFFRTTASDYH  
QSRALVHIVKHLGWTWLGAVSSDNDYGNYGMSIFQKIAQEEGICMEYSVKFYRTEQEKLOK  
VVETMKGKTAKVIVAFVSFLEMGLLIDQLSVQNTGLOMIGVKSWITSENYITPKSFHVLGGSL  
GFAMRKMIEGFSDFALKTFWEKHFQCSQTKPNASNYASSCSRYNDLLMLKNYKEDVTEH  
RYSSNVYEAVYAVAYSLHSLKCKERVKCEKGMTIQPOQVVEALKKVNFSVKFGDRVWFDST  
GSTVAQYEVVNWQRISDESFOFKTVGYDASLPPNORFLLNTENIIWAGGMLEKPRVCSE  
SCPPGTRKASQKGRPACCYDCIPCAEAGEISTDTSNNCKQCPGEYWSNDKKNKCVLKAVE  
FLSFTEVMGVLLL FVSLFGVGLTTLVAILFYNKKDTPIVRANSELSFLLL FSLILCFLCSITFIGR  
PTEWSCMLRHTAFGITFVLCISCVLGKTIVLMAFKATHPGSNVMKWFGPVOQRLSVLVFTFI  
QVIICVLWLTISPPFPYRNMKYYYKEKIILECSLGSIVGFWAVLGYIGLLAALCFILAFLARKLPDN  
FNEAKFITFSMLIFCAVWITFIPAYFSSPGKLTVAVEIFAILASSIGLLFCIFAPKCYIILCKPEQNTK  
QHIMGKN

>Dr\_9\_5\_F

MLILLSIFLLFNEPFTKAEDTICQKMGDPKYALFSKVG DVTIGGIF SIRSVEILPSLEFTOKPQLL  
SCSSVNLRD FRMAQIMIFAIEEINRSESLLPNV SIGYKIYDSCGSRLSSISATMSLMNDQEFPK  
GNICNGOYPIHAIIGETESSATVILSRTTGPFKIPVISHSATCECLSNRRDYPSFFRTIASDYHQ  
SRALAYIVKYFGWSWVGAVNSDNDYGNNGMAIFLKTAEEGICVEYSVKFYRTEPEKLOKVV  
ETMKRSTTKIIIAFLSRVEMVNLL EELSIONISGFQVIGVEAWTTAKSLITPNSFHILGGSLGFAV  
RKIDTEGFLDYVIKSFWD SAFPCLIVNSSQLKVNCS SYKDLLVLKNDNE DVPEORYASN VYKA  
VYAVAHSLSL LNCKEKKGCQKNLTIOPYQMVEAL KKNFTIKFGDRVWFDSTGATIAQYEV  
VNWQQDSDGLIQFKPVGYYDASLPPDKRFVVKTENIIWAGGK LKKPKSVCSESCPPGTRKA  
AQKGRPVC CYDCIPCAEAGEISNETDSVNCKQCPLE YWSNTEKNKCVFKSVEFLSFTEVMGV  
VLVFFSLFGVGLTMLVAILFYNKKDTPIVKANSELSFLLL FSLTLCFLCSLTFIGRPT EWSCML  
RHTTFGITFVLCISCVLGKTIVLMAFKATLPGSNIMKWFGPVOQRLSVLAFTLIQVIICVLWLI  
SPPFPYKNM KYYYKEKIILECSLGATICFSAVLFYIGLLAILCFILAFLARKLPDNFNEAKFITFSM  
LIFCAVWITFIPAYVSSPGKFTVAVEIFAILASSFGLLFCIFVPKCYIILFKNEQNTKQHIMGKI

>Dr\_10\_1\_F

MFGFGFLLLCSIKAKEVESNCNMIGKPENPLLSQDGDIIIGGAFSIHNKINLIIPSFTEKPHHLM  
CTSLNLRHFAQTMIFAIEEINRSKRSLLPNISIGYQIFDSCGSTLASMRRSSMALINGQELTAEH  
TCSGKPAVKAIIGESSESSTTIVLSRAAGPFNIPVISHFATCACLSSRKQFP SFFRTIPSDYYQSR  
ALAQLVKHFGWTWIGAVRSDNDYGNNGMATFVEVAEKEGVCIEYSE AISRTNSKD KIAKVE  
VIKKGTA KVLMAFLAQGEMDVLLEELIRONVVGLOWV GSESWITSSYLATERTLNILGGAIGF  
TIIKSKIPGLKEFLLKVGPSQNL SNALLGEFWEMVFGCCL SPTVCPNSEHATFCDGSENLTNV

SNAFTDVSELRISNNVYKAVYAIAYALHNTITCKNSNGGNENITCGDVDLLVSSQVLHSLQNV  
NFTMDSGETVYFDKNGDPMAYELVNWQKNGAGETKFITVGQYDASLSSEQQFVINSFDII  
WAGDSPTKPISVCTESCQPGFRQAVIKGRPVCCECLOCPAGEISNTTDSAECIKCPLEYWS  
NKNHSICVLKKVEFLSFEENMGILLTAFSLTGVTLTIAVAIVFYKFIDTPLVKASNTELSFLLLFSL  
SLCFLCSLTFIGRPTEGSCMLRHSSFGVTFALCMSCVLTRTIAVVMFAFKTTVPGSGLPHCSLP  
LQRISVFCCTVFQVMICILWLALARPMPYKNSMYSLDKVILECDLGSAGFWAVLGYIGLLSVL  
CFFLAFLARKLPDNFNEAKFITFSMVIFCAVWITFIPAYISSPGKLTVAVEIFAILASTFGLLFCIFT  
PKCYIIIFKPEQNRKHMIGKT

>Dr\_7\_1\_F

MLLLATILTTIACTLSAAEPECEAYMTDELLYFSKEGNVSIGGVFSFHQNPVGVNPTLRTNPGN  
IRCNGLDPGELOYAITMIFAIEINNRTDLLPGFILGYRIYDSCPSIPLSVGASLTMNGOMETK  
KSCASPSAVQAVIGETTSTSTIDIARTIGPFKIPVVSHTSATCACLSNRQQYPSFFRTIPSDYYQ  
SRALVKLVTYFGWKWVGAVRSMGDYGNNGMATFLEAAEKEGICVEYSVSIYRTNSREKILEV  
TDIIKSTSKVIVAFADGNDLDMLIKELYQNVTGYQWVGSEGWITYRFLATAINYAVVGGGAI  
AVPNAYIPGLKEFITGSQPSLRPGNTGLVELWESVFDCTLNSQTHNASKICNGQESLANINTR  
FTDVSDASLLNNVYNAVYAVAHAVEELLTCEKKGKPFHKKTCAEKGKIQPWQVLYLTQVNF  
TTKNGENVHFDKHGDPVARYTLVNWQMSYEGIITFESIGLYDASKPEGQEIOMRDDIEAIWA  
GNQKKVPLSVCSETCLPGTRQAFVKGKPICCFDCIDCADGEFSNTTNAVTCIPCPLYKSN  
NRTQCVLKNIEFLTFNEVMGNILVTFSMCGGCLTITVGLIFFYHRHTPIVRANNSLSFLLLFSL  
TLCFLCSLTFIQPTEWSCMLRHRTAFGITFVLCISCVLGKTLVVLMAFRATLPGSNVMKWFPG  
POQRLSVVFVTFIQLLICMLWLTMSPPFPNKTTNNYKDKIILECDSGSAVGFVAVLSYIGFLAI  
LCFILAFLARKLPDNFNEAKFITFSMLIFCAVWITFIPAYISSPGKFTVAVEIFAILASSYGMLFCIF  
IPKCYIILLKPDNLNSKKKIMGKV

>Dr\_11\_1\_F

MQLWIVGLIGEIIRLCSTEQSCGLQGRVISESLYKEGDVIIGGLFPVYNEAPVFNHAFTQIQNR  
SRCQGVDLRSYRWLKTMLFTVEEINRDPFLLPNILGYLVADTCLAESTTLSAALAIMTGOEET  
VSDTECIVAPRVPVIVGDARSSASIGVADTLGVFDIPMVSYFASCACLDNHRFHTFLRTVPS  
DAFOAKAMARLLHLLDWTWVGWVAGDDEYGGKSGVQLLLKELEHVGVCVDYLEFIPKSHSQ  
RRIRRTVETIOSSTAHHVVVTFAIAPDIEVLFKEVVQNVNTRQWIATEAWSTSVQFLDPASIPLLA  
GTLGFALHRADIEGLGAYLSQLNPAKOSNEPFVKDVWEEIFGCSLAODWQPSFKRPKCTGS  
ENVEIHGGIYTDVSQLRVTYNVYKAVYAIAYAIHNMIACQPGRGPFENGQCPDVNOIKPRQLL  
HYLNAVNFVTPVGEVYFEDNGEPSASYDIMNWHVDESGAVNFVQVQGFDAANGPGOELNI  
NIKKVWGGGWSQVPSVCSVSLPGTRKSVQKGAICCFDCLPCAAGEISNLTDSTKCI  
RCPEKFWSNVERTKCVPKIVEFLSLQDTMGIVLTVLSVTGATLTTTTLATFFHHRDTPVLRANN  
SELSFMLLVSLTLCFLCALVFIGRPATWNCMLRHRTLFGVSFVICIACILSKTVVVLVAFQATLPG

SNLMQYFGPIQQRAGILVCTMVQVVICLLWLLLAPPLPTERAGGEFGARVILQCTVGSVVGFA  
LVLGYIGLLAVVCFLLAFFARKLPDSFNEAKFITFSMLIFCTVWIVFVPAYVSSPGKYTVAVEIFAI  
LASSYGLLLCIFTPKCYIILLKPEKNTKKNMMAK

>Dr\_1\_1\_F

TPVLRRAIHLVFFLFYPIQSNSEANCKLWKELDLTVVHKEGDVILAGMFPPIHSGIDQELNFRNQ  
PDQRKCWGFNMRVFRWSQAMIFFIEEINRNPTLLPNITLGYRLYDTCGLIALSLRTALSVVSO  
PMKRSSSEMCSPPSIPIIIIGDSGSTLSMAISRLLNLFHIPLVSYFASCACLSNKHQFPYFFRTIP  
SDVNQANALARLVKHFQWTVWGTGADDAYGRTGIDLFTAQVTLGVCVSYRIIIPKLPTQQ  
QLQDIVRTIRDSSAHVLAFAIEEDIKPVVDEIVLQNVTKGQWVASEAWTSTLISTKENFPSLS  
GTIGFAIRRAEIPGLKHFLDSIQPLADPYNVFAREFWETOQOCTLNTSLPTSSTMDPVNYSHS  
CTGMERMQDTSIFNDVSQLRVTYNMYKAVYTVAAHALHNLLCQREHRSALTOQCPDIHNL  
QPWQVIEVLRKVNYTNMFGDLIYFDENGDPVGSYDIVNWQKGGDDVPVQYITVGRFDSSLP  
KGQQLVLNQNKIVWHGGTNKVPVSVCSASCPPGYRKVRLEGQPCCYDCMLCAEGSISNT  
TDQAECLLCPEDFWSNKHRYCVPKEIEFLSYLEAFGMVLAAILGAVAAISVGVVFFRHRD  
TPLVRANSELSFLLISLTLFCICALTFLGQPSHWACPLRRISFGLTFALCLSCLLSKTLVVLIA  
FKSTLPGNNTARWFRPPQORLGVFICSLLOGGVCIWLTTASPPVKNTWLYRDRILECHLG  
SVVYFCCVLGYIGCLA AFCILAF LARKLPDNFNEAKFITFSMLIFCAVWITFIPAYVSSPGKFTV  
AVEIFAILASSYGVLLCIFAPKCYIIIFMPEKNSKKYLMTQK

>Dr\_12\_3\_YP

VQVICCTWLCVAPPIPHMLMTHETARIILLCDVGSSFAFSLVLGYIGLLAAVCFLLAFFARKLP  
DNFNEAKFITFSMLIFCAVWIAFVPAYISSPGKYTVAVEIFAILASSYGLLLCIFTPKCYIILLKPEK  
NTKRYVMSKS

>Dr\_9\_1\_F

MSVFFCTLLIFFQLYAKAEKPICIMMGDPKYPLLSKEGDISIGAVFPVHSIETLPLFKFTQKPQL  
LSCSSVSIRDFRMAQIMAFIEEINRNESLLPNVSLGYQIYDTCGSGLSLMGANMALMNVQE  
FASRGSCNGQSPVHAIIGETESSNTVILSRTTGPFKIPVISPSASCECLSNRKEYPYFFRTIASD  
YHQSRALAYIIKYFGWSWVGAVNSDNDYGNHGMAIFLSTAEKEGVCVEYSVKFORTEPEKL  
KKVVDTIKKGTSKVIVAFLTEFEMKNLLEYLIIQNVTGLQVIGVEAWITANSMIKPN SFHVLGGS  
LGFAVKKLNIEGFEDYVTKAFWETA FPCSQTSQKENSQYKLCNIYRDLLVLKNDNKDVPEQR  
YASN VYKAVYAVAHSLHNILKCRENGACETDMKIQPQQVVEALRKNFTIKMGDCVWFDST  
GAVVAQYEVNWQPDYNGSIQFKPVGYDASLPPNQR FVINTENIIWAGGQLKKPR SVCSE  
NCPPGTRKAVQKGRPVC CYDCIPCAEGEISNETDSNNCKQCPGEYWSNAEKNKCVLKAVE  
FLSFKELMGIVLVFFSLLGAGLTTLVAILFYSKKDTPIVKANSELSFLLLFSLMLCFLCSLTFIG  
RPT EWSCMLRH TAFGITFVLCISCVLGKTIVVLMFAKATLPGSDVMKWF GPIQQRLSVLVITIV  
QVLICVLWLAVSPPLPYKNTKYFKEKIILECSLGSTIGFSAALGYIGLLAILCFILAF LARTLPDKF

NEAKFITFSMIIFCAVWITFIPSYLSSPGKLTVAVEIFAILASSFGLLFCIFLPKCYIIMCKPEQNTK  
LHIIGKL

>Dr\_12\_1\_F

MAFLRLYLFLTVLLFSFFISSQLPQICRLLRRTDDLPLVSEGDIMIGALFPLHDTILESPPSFTT  
EPHPTQCSGFNFRTFRWMQTLIFAIEEINRDKQLLGNLTLGYKIYDSCSTHFHALRTALTMN  
GNEEIAGISECRGGVPVIGDGGSTLSIVVAQFLGVFHVPOISYFSSCACLSNKLDPAFLRTI  
PSDFFQVDALVQLVQHFGWSWIGTFAGDDAYGRGGAQIFNEKVTKLGACIAFYEIIPKNHQQ  
TEMSRIVERILESRSHVILVFALEODARALFLEVLHNNLTGIQWLASEAWITAAILSTPEFHSLVLO  
GSLGYAIRRADIPGLQPFLRLHPSKYPODPFVEQFWEEMFKCSLGIINRSSSIRPPCDGSEV  
LVNINNIYSDVSQLRISYNYKAVYIAHALDMLHCEPGKGPFAAGGLCPNFSSMHPWQLLD  
YLKHHVFTNDFGEDTKFDINGDPVAMYDLINWQLSGKQEMOYVTVGKYDETMKPKLVIEEK  
NIIWSGNQKQVPLSVCSTSCPPGTRQATRPNFPICCFDCIVCAAGEISNHTDALECVKCSPEF  
WSNTRRDTICIPKVEFLSYNDTMGITLLSVALLGSCFTLAVTLIFALKRHTPLVRANNSEISFLI  
LSSLLLCFLCALAFIGRPTTWSCGLRHTAFGIAFSLCLSCVLGKTLVVLMAFKASLPGSNVMR  
WFGPLOQRGIIFMCTAVQVICCTWLCVAPPIPHMLMTHETARIILLCDVGSSFAFSLVLGYIG  
LLAAVCFLLAFFARKLPDNFNIAKFITFSMLIFCAVWIAFVPAYISSPGKYTVAVEIFAILASSYG  
LLLCIFTPKCYIILLKPEKNTKRYVMSKS

>Dr\_13\_1\_F

MAQIYATLLTLCLLLYIRVQCQSNKYKCIYQGDDDTYSFYQGGDLVLGGIFPLHSSTIPOFFS  
FTTKPKLIQYKFFTPRALRWMQTMIFAVREINQRQDLLPNLSLGYHIRDSGDDIPVSVKRSLLL  
VNGOPEKGGSGQSCEDTRKQSPVIVGEASSGVSMAVLRTLGTFOIPLVSYFASCSCLSNKR  
EFPAFMRTMPSDLFQIKALVKLVYFKWTWLVGIGVDTDYARFAIQFLKESSEKYNICPAYVHI  
YPVALTQONTVEELVKILKSSSARVILNFSVDSYLYGVLKECRRQNVTNLQWIASEAWATSKVL  
WDDFGDLLKGTLGFAIRRADIPHLGSYLRVSSSSVAQTSPPFFTEFWEETFHCRLNGSLNTHV  
HEEASYNWPACNGNETLDDVYTLVSDVSQLRVSYNYKAVYLIAHALHDMSTCDPGKGPFK  
NGTCGSLYQILPWQLLYMKRTNFTTLGEEVRFDKNGDPIASYDLMNWQRESGSLQLVRV  
GIYDASFKDDKDLVIDESVIMWHRGDKAPESLCSKSCLPGSRKARQKGPVCCFDCISCAE  
GEISNQTDSIDCLTCSKDTWPNQSQDQCIPKTLEFLSFQEPLGIILWVFSALGACAALAVLCV  
FVMYRTPVIRGNNIELSLLLLFLCACFLIGLTLGKPTDWLCOIRYPAFGISFTLCISCILAKT  
VVVLMFRATIPGNNVMKWFGPVKQRSSVILCTCVQALICIIWLTTKPPLASYNSKFLSATIIVE  
CSVGSEVGFVCVLGYIGFLSSLCFFLAFLARKLPDNFNIAKFITFSMLIFFAVWITFIPVYVSSS  
GKYMVAHVHFAILASAFGLLMCIFAPKCYVLLKPERNDKKSMMKK

>Dr\_10\_2\_YP

KSELLLLMVLVTHGICVPNLAQVCRLLGQPALPLLSEERNINIGAIFSLHKSALLKSHNFTSKP  
KQTTCCGGLNLREFKFVQTLIFAIEEINSSLLPGASLGYKIYDSCGSVAQAIFSGMALMNGYE

ETLSDTSCSTPPAVHAIVGESNSSPTIGLASVVGPFSLPLVSHFATCSCLSNRKRFRFTFFRTIP  
SDYYQSRALAOQLVKHFGWTWVGTVRSRSDYGNNGIATFEEAAKQEGICIEYSEAVFKTDPEV  
QFLKTIEVIKKATTKVVAFMAFGDFVLLLKVMAQQNITGIQWIGSESWITSRNLAETKEYHFL  
SGAVGFAIANSKPVGLREFLMNVHPDKELNELLKEFWETVFLCSFRNSSSGGCTGSEKLS  
ELQNEYTDFSELRIENKVYTAVYAVAHSLSLHNVLKGFKFFTNSSKKQLPTPOKVLEYLRDVNFT  
VNTNENIFFDASGDPVARYDLVNWQPTKDGSLQFKLVGIYDSSLPSEQRLQINQESMLWAG  
NSGQLPVSVCSESCPPGTRKAVQKGRPICCYDCIPCAEGEISNYTDSDDCFPCGLEYSNE  
SKDRCVLKVIEFLSYTEI

>Dr\_13\_2\_YP

TLLMVWFLMYLSVQSOYNSKVRCVFOGDDDTNTFYOGGDVVLGGLFPLHFSPISLSSYKT  
KPTPTTYKFFTPRALRWMQTMIFAVREINQRQDLLPNLSLGYHIRDSGDDIPVSVKRSLLLNV  
GQPKDQSGQSCEDTRKQSPVWVGEASSGISMAVLRSLGCFKIPLVSYFASCSCLSNKKEF  
PAFMRTMPSDLFOIKALAKLVHYFQWTWVGVIGVDTDYARFAIQFLKESQQLNICLAYVOLY  
PVALNQDSAEELVRMLKSSSATVIISFVSYSYLGILKECRRQNVTHLOWIASEAWATSKSLW  
EEFGDLLKGTGFAIHRADIPHLGSYLKEIRPQTSHFLESEFWEETFRCRLNGSLNTHAHGEQA  
QNWPACNGSESLDDVYTTYSDVSQLRVSYNVYKAVYLIAHALHDMSTCVPGKGPFGNGTC  
GSLFOIQPWOLLYMKQTNFTTLGEEIRFDENGDPIASYDLMNWQRGSDSSLQLRVGFYD  
ASLEDDKDLVIDESLIMWHRAEKAPESLCSKSCLPGRKARQKPKVCCFDCISCAEGEISN  
HTDSIECLTCSEDTWPNQSQDQCIPKTLEFLSFQEPGLIILWVFAFGACAALAVLCVFVMYR  
KTPVVRGNNIELSLLLLLFLCACFLIGLTLFLGKPTDWLCOIRYPAFG

>Dr\_2\_1\_F

NTMIHIFLCIFHLSSAAMTSRCIPRGNFDLPVFMSTSGDFTIGGIFPLHYRVELPPTDYMKKPLT  
AMCRGFDPMAFWALTMGLAVEEINNRKDLLPEHTLAYRIFDSCATPVMAQKAVLAALNGO  
DVVQSFMCSGASPLLGLIGESGSSQSIVSRTLEPFRIPMISYFSTCSCLSDRKQFPTFFRVV  
PSDDYQVKAIAQLLKRFDWTWIGVVTEDHDYGRFALQGLKREIENTKICLAYHEMIPKDYTOE  
RVLKILKVMKESTAKVVVFSGEGEFYFPLTEFVAQNITGIQWIASEAWWTASMLAETYSFLDG  
TIGFAIRQGHVPGLQDYIRTVTPERYPSIPQVQELWEALYGCSPSTLSSHLPSTGKEILRK  
EYSAYMNTSSPRVTYNVYKAVYAFASLHNLIECRNGHGPENLSCANLNNVFPWQLQHYL  
QEISFSISGEEVNFDIKGAIPSYDLINWORSASGDMQFIKVGLYDGAQHSGKELVIEKQAIWA  
SNQQTAR  
PVSVCNNGCTPGYRKAVRHGQSLCCFDCVPCDIGKISNQTDSVDCLSCPEDYWSNVNRT  
CQKVIEFLSHDAMGMTLVIAVAGAFLLTITVLGIFLYNKGTPIVRVNNSSELSFFILVSLTFCFLCA  
LIFIGEPTSWSCMLRHTAFSITFSLCISCILGKTLVVLAFTAATRPGNMIMKWLGPQQRIFCC  
TLVQVLICTVWLVSPPFPYRNTKYQQSKIILDCSVGSDLAFWCVLGYIGLLACVCFFLAFLAR  
KLPGNFNEAKYITFSMIIFCTWVLAFPAYVSSPGKFTTAVEIFAILASSFGLLFCFLFAPKCYIILV



KPEKNTKQHLIGKV

>Dr\_2\_3\_YP

RAMIYIFMSIFHLSSASMALICSPHDFDLPVFM TSGDFTIGGIFPLHYRVKLPPTDYMKKPLTA  
QCRGFDPRAFRWALSMKLAVEEINNRRKDLLNFTL AYKIFDSCSTPVTAQKAVLAVMNGQEV  
VOSSMCSGAGPLIGLIGESGSSQSIVLSRTVQAFQIPMISYFSTCSCLSDRKQFPTFFRVVPS  
DDYQVKAIAQLLKRFDWTWIGVVTEDHDYGRFALQGLKREIENTNICLAYHEMIPKDYTQERV  
LKILKVMKESTAKVVVWFVEGEFYPV LREFVAQNITGIQWIASEAWTASMLAETYSFLDGTI  
GFAIROGHVPGLODYIRTVTPEKYPSIQVQELWEALYGCSPSTSTLSSHLP SCTGKETLRKE  
YSAYMNTSSPRVTYNVYKAVYAFHA SLHNLIECRNGHGPFENFSCANLNNVFPWQLKHYLE  
DVSFSISGQNVNFDNKGDSVPYYDLINWQRSASGDMQFVKVGLYDGAQHSGKELVIEEQAI  
TWSNQOTKAR

PVSVCSYRCAPGFRTAACRGQPLCCFDCVPCESGKISNOTG

>Dr\_2\_2\_YP

TMTILLWLLVYHLSVLNPAQASKCLLQNEFEPGLMANGDFVIGGIFPLHYNOEMPDLNFTY  
KPGPVKCNFGDTRAFRWAITMKLAVEEINKRVDLLPNYTLGYKIFDSCAYPLTGQRS AVAVLN  
GPNELESPLCADAAPLLAVIGESGSAQSIVSRILQPF GIPMISYFSSCACLSDRREFPTFFRVI  
PSDAYQVKAIKLLRHFNWTWIGVIRGDHEYGRFALQGLLKELEGTGICVAYOKMIPLLYDRO  
KALEIIHVMSHSTARVVVWFSAEGELTPFLRDYMEQNVTGIQWIASEAWTSSVFAGSEFDPF  
LGGTIGFGIROGOIPRLKEYLTTVNPERYPTNPLVYELWGALYGCSPSWSNLSSHLP SCTGK  
ETVRLQYSAYLNTSSPRISYNVYKAAAYAIAYSLHNL IYCTPGKGPFSNSTCANAPHIYPWQLQ  
QYLOEVSFTISGEKVNFDMKGDSIPSYDLINWQRGSAGNIEFINVGMFDGALESGOELVIKEE  
AIMWPGHQTEA

VLVSVCSNSCAPGFRKAVRRGQPLCCFDCVPCDSGKISNETDSLDCIACSE DYWSNADGTV  
CIPKVVEFLSHDAMGLTLTVIAVAGACLTLAVFSVFLYYKNTPVVRINNSELSFFILLSLTLCFLC  
ALIFIGEPTSWSCMLRHAFSITFSLCISCILGKTLVVLAAFTATRPGNNLMKWLGP TQQRIIIFC  
CTLIQVLICTVWLVASPPFPYRNTKYQQSKIILD CSVGSDLAFWCVLGY

>Dr\_4\_1\_F

MHVNLLLILTLCCIRRLFPAVCGVHLGTCILOQDPQPPSLF SKGDFVIGGTFTIHYYLRTEKRTY  
TVRPOPLMCSGSMDFRELFARVLQFAIQEINNSSNLLPGITLGYHIYDSCASVPMVIK VAVO  
LANGLQLAFNDTDSCAQSSEVLALVGESGSTAAITTSRLFGPFGIPOVSHYATCACLS DKRO  
HPTFFRTIPSDHHQAAALARMVKRFGWTWIGAVRSDSDYGNNGMASFLKAAEVEGICVEYS  
EAYYRTQTRNKLQRVADVIRRSTARVIVAFMAAGDMRFLLEELSQQPPPPMQWIGSEAWT  
DPQMLRFNLSIGAVGFAIPRSVIPGFRKFLLDLSSEQALKIPVLKEFWESSFGCSLKQHTGYF  
SGMPACDGTEDLGTLPYTDTSQLRISNMVYKATYAIHALHGIVCNGKLC DKNIKVEPRK  
VSDQLKQVNF SKNNYSVSFDANGDPVAVYELVNWQLQGDGSIDFVTVGKYDASQPKGQEF

SLNRAIIWYDGTKEKVPVSVCSSESCPPGTRKAVKKGRPVCYDCINCADGEINNETDSLDCCHK  
CQPDYWPNAEKIKCLPKPVEFLSWDEILGNTLAAFSIAGSLVALSMALVFYKNRVSPIVRANN  
SELSFLLLFSLTLCFLCSLTFIGQPTWESCMLRHTAFGITFVLCISCVLGKTIVVLMFAFKATLPG  
SNVMKWFGPPQQRLSVFGFTLVQIIICVLWLTISPPFPYKNMQHYKDKIILECSLGSVAVGFWA  
VLGYIGLLAFLCFVLAFLARKLPDNFNEAKFITFSMLIFCAVWITFVPAYVSSPGKFTVAVEIFAIL  
ASSFSLILLIFAPKCFVIVFRPEENTKRHLLGKV

>Dr\_4\_2\_F

MNAHLLFTVKMLCIARLCIAVCGVDLGTICILQGDAPALSEDGDFIVGGAFTIHYYVRTEKY  
TYTRRPQPLECSGSMDFRELFARALQFAIQEINNSSLPGIFLGYHIYDSCGSVPMIAKVA  
LQLANGLDPKYNDTDSKAKSAVLAALVGDSASTPAISISRIFGPFEIPOVSHYATCACLSDKRO  
HPTFFRTIPSDHHQAAALARMVKRFGWTWIGAVRSDSDYGNNGMASFLKAAEKEGICVEYS  
EAYYRTYPLSKLKRADVIRSTARVIVAFVAAGDMRFLLEELSKEPLPPMQWIGSEAWVSDP  
QMLRFNLSIGTMGVAVPRSLIPGFRKFLDLSPYKVLKFPLLTEFWESSFSCSLOQQOTDPST  
GMPACDGTEDLGRLKNPYTDTSQLRVSNMVYKATYIAIAHALHGIVCNETQCSKNIKVPRO  
VFDQLKQVNFSKNNYSVSFDANGDPVAVYELVNWQLQGDGSIDFVTVGKYDASOPEGQEF  
SLNKAIWYDGTSEKVPVSVCSSENCPPGTRKAVKKGRPVCYDCIPCGEISNKTDSPPDCD  
KCPPDYWPSTEKDKCLPKPVEFLSWDEILGIIAVLSVSGSLLALSMALVFYKNRASPIVRAN  
NSELSFLLLFSLTLCFLCSLTFIGQPTWESCMLRHTAFGITFVLCISCVLGKTIVVLMFAFKATLP  
GSNVMKWFGPPQQRLSVFGFTLVQIIICVLWLTISPPFPYKNMQHYKDKIILECSLGSVAVGFW  
VVLGYIGLLASLFCVLAFLARKLPDNFNEAKFITFSMLIFSAVWITFIPAYVSSPGKFTVAVEIFAI  
LASSFSLILCIFAPKFFIILFRPEENTKKHLMGKV

>Dr\_4\_3\_F

LLIVTLQCIITRLYVYGNRLGSCILQGDPOPPVLFDEGDFIIGGAFSIHYYLRTEKHYYTMRPO  
SLECSGSMDFRELFARVLQFAIQEINNSSLPGITLGYRIYDSCGSVPMIAVKSFLQANGL  
DLIFNDNDSCSKSAVAALVSGSGSTPSISISRLYGPFQVYHYATCACLSDKRQHPTFFRT  
IPSDHHQAAALARMVKRFGWTWIGAVRSDSDYGNNGMASFLKAAEEEGICVEYSEAYYRTO  
PRSKLMRVADVIRSTARVIVAFMASGDMRLLLEELSQQPLPPMQWIGSEAWFTDPEMLRF  
NMCIGGVGFAIPRSVIPGFRTFLDLSPQRAMKFPLLTEFWESSFSCSLKQQTGPSTGMPAC  
DGTEDLGRLKNPYTDTSQLRISNMVYKATYIAIAHALHGIIICNEKCKCNKNIKIEPREVLKQV  
KFSKNNYSVSFDAYGDPVAVYELVNWQLQKDGSIDFVTVGKYDSSQPKGKEFSLSRAIWYD  
GTEVPVSVCSSESCPPGTRKAVQKGRPVCYDCINCADGEISNDTGAL  
DCLDCHECLSDYWPNNKCLRPVEFLSWDEILGIIAFAVAGSLVALSMALVFYKNRA  
SPIVRANSELSFLLLFSLTLCFLCSLTFIGQPTWESCMLRHTAFGITFVLCISCVLGKTIVVLM  
AFKATLPGSNVMKWFGPSQQRLSVFGFTLVQIIICVLWLTISPPFPYKNMQHYKDKIILECSLG  
SAVGFWAVLGYIGLLAFLCFVLAFLARKLPDNFNEAKFITFSMLIFCAVWITFVPAYVSSPGKFT

VAVEIFAILASSFGLILCIFAPKFFIIIFRPERNTKKHIMGKV

>Dr\_14\_1\_F

MPVIELVSLGLALLLNFSVVLCTSLDKSCWTLGDFNSPVLEODGDIVIGGLFPMHNIAPETDY  
NFSDLPHYQDCSRFDFFRAFRWVQTMVFAIEEINSNSSLLPGVALGYRILDSCDHVHTSLRSA  
LFLNGTFGQTQTDVGTANCLSTAPVPAVIGLASSSPTRAVAQTLGPFGIPLISYFATCTCLTD  
KKEYPSFLRTVPSDRFQVQGLVQLVSHFGWRWVGTVGTDDDYSHYGIOAFTEQLERLGSCI  
AFHQTIPKSPSQAQIRSILNSLESSTAQVIAFATEGELLELLVEVARRNLRLQWVASEAWVTA  
KLLTIPELHPVLIGTVGFSFRGTAIPGLAEFLFRVRPSSRPESAFNMFWEELFGCRLGYEDSN  
DSVLPLCTGSENLETESSYTDVSRVRISYINVYKAVYAIHALHQLLQCGSKEQGS DHSCNT  
ESKFSPLOLLRYLKKVHFTNQFNEKVYFDTNGEPVPLYDIINWQKNARGTINFQLVGTYDGSA  
PHGQQLKIEEGLIRWTGGQTKVPVSLCSPPCPPGTRQATRPGQPVCCFDCLPCAEGEISNIS  
GATECLKCPEYYWPNKERVSCVAGIEEFLSYHDVMGIILISLSLFGVAVATVMMVIFIFRSTPIV  
KANNSEMSFLLLLSLKLCFLCSLVFVGRPSPLTCRARQAAGISFVLCISCILVKTIVVLLAFRS  
TVPGSISLKVFGPPQORVFIFCCTTGQVILCACWLALAPPYPYKNTSYODGRIILECKDILPLG  
FYLVLYGIGLLSCMCFVLAFLGRKLPDTFNEAKLITFSMLIFCAVWISFIPAYNSSPGKYTVAVEI  
FAILASTFGLLFSIFIPKCYVILLRPDLNTKKGMTGKL

>Dr\_16\_1\_F

MDTWITLYLCFYLFFKSSISASSISKSGSCQLOGHFKLNGMYQDGDLMIGGLFAFHLLITVPEL  
NFKREPEQTHCERFYMASFQQAQTMVYAINENNNPNLLPNITLGYHLYDNCVKLGVAFRSA  
TALVSGTEESFNVLNCTGPPPIIGIVGDPGSTHCIAISSVLGLFRIPMVSYYATCSCLSDRSKYP  
SFFRTIPSDAFQVRAMVLILKHFGWTWVGLLYSDDDYGINAAQSFQKEVQLFGGCVSFSEIL  
PLDNNHMDIQRIVQVIQASTAIVVVVFSTEAYLLSLMDEVVLQNVTGROWIASEAWATSSVFH  
TKRLLPFLGGTLGIAIRGEIQGLRDFLLSLHPDSNLRNNMVKIFWENMFECSTVGRKGE  
TMCTGOEDIRTTNTPYSDVSELRASYNVYKAVYALAHALHDLIQCEEKGPFRCDGITNLKP  
WQLVHYLQKVNFTTGFGDHSVDFDENGDALAIYDVMNWHPPSSDGSIVVRTVGVVDEGASTG  
KVLTL EEDEIYWNTAKNKPARSVCSESCPTGTRRTRRKGLPVCCFDCLPCADGAISTIPDSIE  
CVVCPDEFWSSPKKNQCVPKDVEFLTYGDPLGISLTTASLLGSCICSAVVVIFAHHRHTPVVR  
ANNSELSFLLLVSLLKLCFLCVLLFIGQPQLWTCRLRHAVFGISFVLCISSILVKTMMVIAVFKSS  
RPEGKSAMKWFQSHQORCTVLVLTALQVVICAVWLTNASPKPYKNNQYTSSKIVYECTIGSV  
VGFAMLLGYIGILAAVSFLLAFLARNLPDHFNEAKFITFSMLIFCAVWIAFVPAYVSSPGKYAVA  
VEIFAILASSFGLLAAIFAPKCYIIILHPERNTKKAIMGRA

>Dr\_16\_2\_F

MWITLNICLYMYFNHISGVFTSESCQLOGCFKLNGMYQDGEFIIGGLFEVQNLKVFPELSFTN  
EPELPOCEEFYMASFQQAQTMVFAINEINSNSKLLPNITLGYQIYDNCLRLGVAFRAAMSLVS  
GTEESSNLSCTGPPPIVIGIVGDPGSTQSITISSVLGLYRVPVMSYYATCSCLSDRKKYPSFFRT

IPSDAFQVRAMVQILRHFGWTWVGLLYSNDDYGIYAAQSFOQEMOILGGCVAFSEMLPYDN  
NGRDIQRIAGVIOKSTAKVVVAFSTDLASLMDELLQNVGTGKOWIASEAWTTTPVLOTPOYLP  
LLGGTLGIAIRRGQIQGLYEFLKNLRPDKNPKNSTIRIFWETMFGCKFEVGGKKVDEQQERG  
RNKCSGOEDLNNSETAYTDVSELRASYNVYKAVYALAHALHDLVKCEEGKGPFTGNSCADIS  
NLKPWQLVHYIQNVKFTTGFGDHVSFDENGDALAIYDVMNWHPRSDGSIIVHVGVYEEAIL  
GKVLTLDEDALFWNFETKKAIPPDSVCSESCPPGTRRARKKGLPVCCFDCLPCGDGEISNTT  
DSPECIFICPEDFWSSPENDRCVPKEMEFLSYDDPLGISLTTASLLGTFCFVLVLFAYHHNTP  
VVRANSELSFLLLVSCLKFCFLCVLLFIGRPRLWTCQLRHAVFGISFVLCISSILVKTMVVIKAVFK  
TSRPEGKTSIKWFGSAQQRGTVIALTSAQVAICTVWLSSASPTPHKNNQYIHSKIVYECAIGS  
VAGFSLLLGYIGLLAAVSFLLAFMARKLPDNFNEAKFITFSLIFCAVWIAFVPAYASSPGKYAV  
AVEIFAILASSFGLLAAIFAPKCYIIILHPERNTKKAIMGRS

>Dr\_16\_3\_F

MCITLNICLHLSFIFISVNSDSCQIQGHFKLNRMYKGDYIIGGLFEVQHLKVPPELSFRMEPE  
QPKCEEFYMSSFOQAQTMVFAIDEINKNPNULLPNITLGYHLYDNCLKLVAFRAATTLISGTEE  
TFSNFNCTGPPPVIIVGDPGSTHSIAVSSVLGLFHVPLISYYATCSCLSNRKKYPSFFRTIPSD  
AFQVRAMVQILKYFGWTWVGLVLYSDDYGIYAAQSFOQEMQRFKGCVAFSEIVPYDNHRDI  
QRIVAVIKASTARVVVAFSTDLLPLMEELLOQNVGTGROWIASEAWSTSPVLHLPRFVPLVRGT  
LGIAIHRGKIKGLHEFLLHIQPDNDPTNNMVRIFWENMFGCSFEKNGYGEKMCTAQEDLNI  
TVNEYNDVSELRASYNVYKAVYALAHALHDLMOCEEGRGPFSGNSCADITKLPWQMPVY  
LQKVNFTTGFGDHVSFDENGDALAIYDVMNWHPSSDGLIVVRTVGVVDEGASAGRVTLTDE  
DAIYWNFETKKPPRSVCSESCPPGTRRAMRKGLPVCCFDCLPCADGEISNMSDATECTSC  
PNEFWSSPKKDQCVPKEVEFLSYEDPLGISLTTASLLGTFCALVLAVFAHHHNTPVVRAN  
SELSFLLLLSLKLCFLCVLLFIGRPQLWTCQLRHAMFGISFVLCVSSILVKTMVVIKAVFKSSRPE  
GKSAVKWFGAVQQRGTVLVLTAVQIVICVWVLSASPTPHKNILYVRSKIVFECSIGSMAGFAIL  
LGYGILAAVSFLLAFLARNLPDNFNEAKFITFSLIFSAVWIAFIPAYVSSPGKYSVAVEIFAILA  
SSFGLLVAIFVPKCYIIILHPERNTKKAIMGRT

>Dr\_16\_4\_F

MWAVLLFCLVLSYYICVTLMASTGICQQQGHFTINGMHQDGDVIGGLFDVQTYLKVYPEI  
SFRTQPKLPNCEL FYMESFQOALTMVFAISEINHNPNULLPNITLGYQIYDTCLRLRVAFOAATA  
LISGTEETISDFNCKGPPPVIIGLIGDPGSTHSIAISSVLGLFRMPMISYYATCSCLSDKKKYPSF  
FRTIPSDTFQVRAIVQTLRHFGWTWVGLIYSNNDYGIYAAQSFHQEMQLFGHCVAFSEILPO  
DNNPRVIDHIMGVIOASTARVVVFSASSLLIPLMNKVVHLNLTSRQWIASEAWVTAAVFRTPY  
YOPFLKGTGIAIRRGEIQGLHSFLLRLHPNSDQRNNIVRIFWETMFGCSFETGDKETFGQQ  
MKKVCTGLEDLSTANTPYTDVSGLRATYNVYKAVYALAHALHDLMOCKEKRGPFSGNSCAD  
ITDLKPWQLVHYLKKVNFTTSFGDSVSFDNNGDALAIYDVLNWQPSSEESIKLHNIGVVNEVA

TEMLTLNNDIYWNFEAQKPPQSVCSSECLPGTRRAMRKGLPVCCFDCLICGDGEISNTT  
DAIKCTVCPDEFWSNLNKDQCVPKEIDFLSYEDPLGISLTTTSSLGTCFCALVMIIFFHRNTPI  
VRANSELSFLLLLSLKLCFLCVLLFIGQPQLWTCQLRHAVFGISFVLCISSILVKTMVVIKFK  
SSRPEGSGAMKWFGTAAQQRCTVLVLTALQIVICAVWLSTSSPTPYKNNQSIRSKIVYECAIGS  
LAGFSLLLGYIGLLAAISFLLAFLARNLPDNFNEAKFITFSMLIFCAVWVAFVPAYMSSSGKYAV  
AMEIFAILASSFGVLVAIFAPKCYIIILHPERNTKKAIMGRE

>Dr\_16\_5\_F

MWAVLLFCLVLSCCYICVTLIASGTCCQQGHFTINGMHODGDFVIGGLFDVQTYLKVYPEIS  
FRTQPKLPNCELFYMTSFQQALTMVFAISEINHNPNULLPNITLGYQIYDTCLRLRVAFQAATALI  
SGTEETISDFNCKGPPPVIGLIGDPGSTHSIAISSVLGLFRMPMISYYATCSCLSDKCKYPSFF  
RTIPSDTFQVRAIVQTLRHFGWTWVGLIYSNNDYGIYAAQSFHQEMQLFGHCVAFSEILPOD  
NNPRVIDHIMGVIOASTARVVVFSASSLLIPLMNKVVLOLNTSRQWIASEAWVTAAVFRTPYF  
QPFLKGTGLGAIIRGEIQGLHSFLLRLHPNSDQRNNIVRIFWETMFGCSFETGDKETFGQOM  
KKVCTGLEDLSTTNTPYTDVSGLRATYNVYKAVYALAHALHDLMOCKEKRGPFSGNSCADIT  
DLKPWQLVHYLKKVNFSTSGDSVSFDNNGDALAIYDVLNWQPSSEGSIKLHNIGVVNEVAT  
GMVTLNNDIYWNFEAQKPPQSVCSSECLPGTSRAMRKGFVCCFDCLICGDGEISNTTD  
AIKCTVCPDEFWSNLNKDRCVPKEIDFLSYEDPLGISLTTTSSLGTCFCALVMIIFFHRNTPIV  
RANSELSFLLLLSLKLCFLCVLLFIGQPQLWTCQLRHAVFGISFVLCISSILVKTMVVIKFKS  
SRPEGSGAMKWFGTAAQQRCTVLVLTALQIVICAVWLSTSSPTPYKNNQSIRSKIVYECAIGSV  
AGFSLLLGYIGLLAAISFLLAFLARNLPDNFNEAKFITFSMLIFCAVWVAFVPAYMSSSGKYAVA  
MEIFAILASSFGVLVAIFAPKCYIIILHPERNTKKAIMGRE

>Dr\_16\_6\_F

MWITLLINIHLILKCISAAVVL RAGACQLQGRFRLNGMYQDGDVILGGLFEAHFFTLFPELTFR  
TEPAPPYCEIFNMESFOYAQTMAFAINEINRNPSLLPNISLGYHLYDNCVMLGMALRAAMSLV  
SGIEESFLNLNCTGPPPIIGVVGDPSSSTPSIAISSVLGLFRVPIVSHYATCSCLSDRKKYPSFFR  
TIPSDAFQVRAMIQLISHFGWTWIGLLYSDDDYGTAAQSFHQEMQLFGFCIAFSEPLRYDS  
NPRDIQRLMEVIOASTSTVVVVFSPSTLVIPLMNEVLOLNTGRQWIASESWATSPVFYTPRF  
LPFLGGTGLGAIIRGEIEGLREFLLQLRPKNDPRNMLKIFWENMFGCSFETGPHVKNVCTG  
QEDLSTTNTPYTDVSELRAANNVYKAVYALAHALHDLMKCEEKGPFSKNSCAEISNLKPW  
QLVHYLQKVNFSRFGDHVSFNKNGDALAIYDVMNWQPGSDRSIRIHTVGVVSEEEKGLM  
LTLDEDAIYWNFETKKPPQSVCSSECPRGSRRATRKGHPVCCFDCLPCRDGEISNTTDTAK  
CTVCPDDFWSNLYKDQCIPKEVEFLSYNDPLGISLTTASLLGTCFCAFVMVIFVHHHNTPIVRA  
NNELSFLLLFSKLCFLCVLLFIGRPQLWTCQLRHAVFGISFVLCISSILVKTMVVIKFKSSR  
PEGKMMAMKWFGAAQQRCTILALTAIQVVICVWLSTASPTPHKNNLYIRSIIIVYECTIGSVTGF  
SMLLGYIGLLAAVSFLIAFLARNLPDNFNEAKFITFSMLIFCAVWITFVPAYVSSPGKYSVAVEIF

AILASSFGLLSIFAPKCYIILLHPERNKKAIMGRE

>Dr\_16\_20\_YP

QPPOSVCSESCPLGTRRVMRKGFVCCFDCLTCGDGEISNTTGENVIE

QNCIIEI

NNLIIDRCVPKEIDFLSYEEL

SLQRTCFCALVMIIIVTFHRNTPIVHANNSELSFLLLLSLKLCFLCVLLLIGQPQLWTGQLRHAV

FGISFVLCISSILVKTMMVIL

VFNSSRP

GKGAMKWFQTAQQRCTVLVLTALQIVICAVWLSTSSPTPCKNN\*IVRSKIVYEC

VGSVAGFYLLLGYGMLAAISFLLAFLARNLPDNFNFAKFNIFSMLIFCAVWNAFVSAYMSSS

GKYAVAMEIFAFLASSFGVLVAIFAPKCYMIILHPERNTKKFIMGRE

>Dr\_16\_7\_F

MWITLLINIYLILKCISAAVVLRAGACQLQGRFRLNGMYQDGDVILGGMFEAHFFTLYPELTFR

TEPAPPYCEIFSMESFQNVQTMFAFINEINMNPNULLPNIILGYHIHDNCVTFGMALRAAMSLV

SGIEESFINLNCTGPPPIIGIVGHPSSTPSIAISSVLGLFRVPIVSHYATCSCLSDRKKYPSFFRTI

PSDAFQVRAMIQLISHFGWTWVGLLYSNDDYGTAAQSFHQEMQLFGICIAFSEPLRYDSNP

RDIQRIMAVIQASTSRVVVVFSPSTLVIPLINEVVLQNMGTGROWIASESWATSPVFYTPHFLPFL

GGTLGIAIRRGEIEGLREFLLQLRPQNDPRNNMPKIFWENMFGCSFETGAQAKNVCTGOED

LSTTNTSYTDVSELRAANNVYKAVYALAHALHDLMKCEEGKGPFGNSCADITNLKPWQLV

HYLQKVNSTRFGDHVSFNKNGDALAIYDVMNWQPGSDRSIRIHTVGVVREEPEKGLMLTL

DEDAIYWNFETKKPPQSVCSSECPRGSROATRKGHPVCCFDCLPCRDEISNTTDPTKCTV

CPDDFWSNLYKDQCIPKEVEFLSYDPLGISLTTASLLGTCFCFAFVMVIFVHHHNTPIVRANN

SELSFLLLFSKLCFLCVLLFIGRPQLWTCQLRHAVFGISFVLCISSILVKTMMVIAVFKSSRPEG

KKAMKWFQAAQQRCTILVLTAIQVVICAVWLSTASPTPHKNNLYIRSIIYECTIGSVTGFSMLL

GYIGLLAAVSFLIAFLARNLPDNFNFAKFITFSMLIFCAVWITFPAYVSSPGKYSVAVEIFAILAS

SFGLLVAIFAPKCYIILLHPERNKKTIMGRE

>Dr\_16\_8\_F

MWAILLFCFLSCNFICVTLMVSSGTCQKQGHFTLNGMHQDGDVIGGLFEIQSYVKVYPEI

SFRTQPKLPNCDLFYMTSFQQALTMVFAISEINNNPNULLPNITLGYQIYDNCLRLGVAFRAATA

LISGTEETISDLNCKGPPPVIQVIGDPGSTHSIAISSVLGLFRVPIVSHYATCSCLSDKKKYPSF

FRTIPSDTFQVRAMVQTMRFHFGWTWVGLIYSNNDYGIYAAQSFHKEMQLFGHCVAFSEILP

QDNNPRVIDHIIGVVIQASTARVVVVFSSALLIPLMNKVVVLQNLGTGROWIASEAWTSTVFRTF

YYQPFLKGTGIAIRRGEIQGLHSFLLRHPNSDQRNNIVRIFWETMFGCSFETEDKETFGQQ

IKKVCTGOEDLSITNTPYTDVSGLRAPYNVYKAVYALAHALHDLMOCKEKRGPLSEKNCADI

TDLKPWQLLSYLKKNVFTTGFGDPVSDNNGDALAIYDVLNWQPSSEGSIKLHSIGVVNDEV

ATGMVLRNLKDEIYWNFEAQKAPRSVCSESCPPGTRKAMRKGFVCCFDCLTCGDGEISNT  
TDAIKCTVCPDEFWSNFNKDQCVPEIEFLSYEDPLGISLTTASLLGTFCALVMIIFAFHNT  
PIVRANSELSFLLLLSLKLCFLCVLLFIGOPQLWTCQLRHAVFGISFVLCISSILVKTMVVIASF  
NSSRPEGKGMQWFGAAQQRCTVLVLTALQVVICAVWLSTSSPTPHKNNQYVRSKIVYECA  
IGSVAGFSLLLGYIGLLAAISFLLAFLARNLPDNFNEAKFITFSMLIFCAVWIAFVPAYVSSPGKY  
AVAVEIFAILASSFGVLVAIFAPKCYIIILHPERNTKKAIMGRE

>Dr\_16\_9\_F

MWAILLFCLFLSCNYICVTLMVSSGTCCQQGHFTLNGMHQDGDGDFVIGGLFEIQRYLKVYPEI  
SFRTQPNLPNCELFYMTSFQQALTMVFAISEINSNPILLPNITLGYQIYDNCLRLGVAFRAATA  
LISGTEETISDLNCKGPPPVIGLIGDPGSTHSIAISSVLGLFRLPMISYYATCSCLSDKKKYPSF  
FRTIPSDTFQVRAMVQTLRHFQWTVWGLIYSNNQYGIYAAQSFHQEMQLFGHCVAFSEILPO  
DNNPRVIDHIMGVIOASTARVVVVFSASSVLIPLMNEVVLQNLTGROWIASEAWVTSVAFRTP  
YFQPFLKGTGLGAIIRGEIQGLHSFLLRLHPKSDQRNNIVRIFWETMFGCSFETGDEVTFVQQ  
MKKVCTGOEDLSITNTPYTDVSGLRAPYNVYKAVYALAHALHDLMOCKEKRGPLSENSCAD  
ITDLKPWQLVPYLLKVNFTTGFGDPVSFDNNGDALAIYDVLNWQPSSEESIKLHTIGVVNDEV  
ATGMVLRNLNEDEKFFFFFFCHFQAPRSVCSESCPPGTRKAMRKGFVCCFDCLTCGDGEISN  
TTDAIKCTVCPDEFWSNFNKDQCVPEIEFLSYEDPLGISLTTASLLGTFCALVMIIFFHRNT  
PIVRANSELSFLLLLSLKLCFLCVLLFIGOPQLWTCQLRHAVFGISFVLCISSILVKTMVVIASF  
NSSRPEGTGAMKQWFGAAQQRCTVLVLTALQVVICAVWLSTSPPTPHKNSQYVRSKIVYECAI  
GSVAGFSLLLGYIGLLAAISFLLAFLARNLPDNFNEAKFITFSMLIFCAVWIAFVPAYVSSPGKY  
AVAVEIFAIVASSFGVLVAIFAPKCYIIILHPERNTKKAIMGRE

>Dr\_16\_10\_F

MWVILHIYFFISCNYSVALMASSGTCQLQGHFTLNQMYQNGDFLIGGLFEIQYLKAFPGLS  
FRTEPKLPHCENFYMTSFQQAITMVFAINEINNNPNILLPNITLGYQMYDNCLRLGVAFRAATA  
LISGTEETLSDLNCKGPPPVIGVIGDPGSTHSIAISSVLGLFRMPMISYYATCSCLSNRKKYPS  
FFRTIPSDAFQVRAMIQILRHFQWTVWGLLYSDDDYGINAALSFHHDVQQFGGCVAFSEILPN  
DNNQMAVOHIVRVIONSTAKVVVVFSTSSYLLPVIDEMLLKNITGRQWIASEAWSTSPVLLNP  
RLRYVLGGTGLGAIIRGEIEGLDNFLLRLRPDNFSQNSMMRIFWENMFECNFDITIGGLRRTL  
CSGOEDLRSKFTPYTDVSELRASYNVYKAVYALAHALHDLMHCEEGRGPFSENRCVDISNL  
KPWQLVHYLQRVKFTTGFGDHVSFDKNGDALAIYDVLNWQLSSEESVTVRRIGVVDEGVTT  
GKVFTLDENAIYWNFETNKPPRSVCSESCPPGTRQATRKGLPVCCFDCLPCGDGEISNTTD  
TTECIACPNDFWSNPEKDQCIPKEVEFLSYEDPLGISLTTAAMLGTFICALVMTIFAHYRNTPV  
VRSNNELSFLLLLSLKLSFLCVLLFIGOPQLWTCQLRHAVFGISFVLCVSSILVKTMVVIASF  
SSRPEGKNAMKQWFGAAQQRGTVLILTALQVLICAVWLSTASPTPHKNSRYIRSIIVYECAIGSV  
AGFSLLLGYIGLLAAVSFLLAFLARNLPDSFNEAKFITFSMLIFCAVWIAFVPAYVSSPGKYAVA

VEIFAILASSFGLLLAIFAPKCYIIILHPERNTKKAIMGKG

>Dr\_16\_11\_F

MWIIAKICLYLSFSCISVASIFRSGPCQLQGQFRLNGMFOEGDLILGGLFEVHFLTVPFPEQSFR  
TEPEPPYCEQFDMASFQQAQTMVFAIDEINRNPNULLPNITLGYLYDNCVKLSVAFRAAMALV  
SGTEESFSSLNCTGPPPVIIVGDPGSTHSAIAISSILGLFRVPMVSYFATCSCLSDRKTYPSSF  
RTIPSDAFQVRAMVQILKRFGWTWVGLLYSDDDYGIYAAQSFOKEMQLFGACVGFSEMLPR  
DNNHEDIQSIVEVIQTSTARVVVFSTEAYLLPLMDEVALKNVTGRQWIASEAWATSPVFHTQ  
HLLPFLGGTLGIAIRRGEIQGLKEFLYLLHPDSNTRNNIVRIFWENIFGCSFEIGGRERKVGCTG  
QEDLKSTNTAYTDVSGLRASYNAYKAVYALAHALHDLMOCEDGRGPFSGNKCADQINLOP  
WQVVHYLQKVNFTTGFGDHVSFDENGDALAIYDVMNWQPSSDGAISVSTVGVVNEGASMK  
MVLTLKENSIFWNFKNRKPPQSVCSSESCPPGTRQVRRKGLPVCCFDCLPCADGEISNTTDAI  
ECKICPDELWPNPNKDQCVPEEDFLSFEDPLGISLTTASLLGTCFCALVMVIFSHHRNTPVV  
RANSELSFLLLLSLKLCFLCVLLFIGRPKLWTCQLRHAAFGISFVLCVSSILVKTMMVIAVFKS  
SRPESKSAMKWFGVAQQRGTMALTTLOIVICTVWLSMASPKPYKNSLYISSKVVECDIGS  
VVGFSLLLGYIGLLAAVSFLFAFLARNLPDNFNEAKFITFSMLIFCAVWITFPAYVSSPGKYAV  
AVEIFAILASSFGLLLAIFAPKCYMILFHPERNTKKSIMGRA

>Dr\_16\_12\_F

SPLIICLYLSYNFKSAASILMGSCQLQGHFGLNGMYOAGDVILGGLFEVHLLAVFPELSFRSA  
PEPPYCEQFDMASFQQAQTMVFAIDEINKNPKLLPNITLGYHLYDNCVMLGMAFRAAISLVS  
GTEELFSNLNCTGSPPVIGIVGDSNSTPSIAISSVLGLFRVPIVSYFATCSCLSNRKQYPSFFRT  
IPSDAFQVRAMVNILKHFGWTWVGLIYSDDDYGNIAAQSFLQDIQIYGGCVAFTEILPLNNNR  
KYIEHVGVVIQASTARVVVFSTSTYVLPLMDEVVLQNVNTRQWIASEAWATSPMFHTQRLLP  
FLGGTLGIAIRRGEIQGLHEFLLHLRPNKNDQHNMMVRIFWEKMFGRFNPGGKGDQKQCSG  
QEDLSSIDTAYTDVKELRASYNVYKTVYALAHALHDLTECDEERGPFSENRCADITNLOPWO  
LVHYLQKVNFTTGFGDHVSFDKNGDVLAIYDVMNWHPSSDGSISVRTVGVVNEGAASGKVL  
TLDEDAIYWNFKIKKAPOSVCSESCPPGTRQATKKGLPVCCFDCLPCGDGEISNVT  
SDAIECTVCPDEFWSNKDKDQCVPEVEFLSYEDPLGISLTTACLLGTCFCALVMIIFCQHRN  
TPIVRANSELSFLLLLSLKLCFLCVLLFIGRPQLWTCQLRHAVFGISFVLCVSSILVKTMMVIAV  
FKSSRPEGKGSMMKWFGTTQQRCTVLILTALQVVICIVWLSNSSPAPHKNSQHISSKIVYECAL  
GSLAGFSLLLGYIGLLAAVSFLLAFLARNLPDNFNEAKFITFSMLIFCAVWIAFVPAYVTSPGKY  
AVAVEIFAILASSFGLLLAIFAPKCYIIILLHPEKNTKKAIMGRO

>Dr\_16\_13\_F

MWIIINIFLCLSKWISADSVLRDLTCLQGHFMLNGVYKHGDVILGGLFDVHLLTVFPQLSFR  
VQPKPPYCEKQVMENFKSSQTMAFTIDEINNNPNLLPNITLGYHLYDNCVRLAMAFRAAMS  
LASGTEESFSLNCTGSPPVIGIVGDPSSTPSIAISSILGLFHVPIVSLYHYATCSCLSDKCKKYP



SFFRTIPSDAFQVQAMVQVLRHFGWTWVGLLYSDDDYGTAAQSFQKEVQLFGGCIAFSTIL  
PQNNPREIQNIMGVIRASTARVIVAISTSSYLLPLMDEVVLQNLTGROWIASEAWATTPAFRTP  
RFLTILRGTIGIAIRRGEIQGLLEYLLRLRPSSDPRNNLVRIFWENMFGCSFASQTVGEQVKKL  
CTGOEDLSITNTAYTDISGLRGPYNVYKAVYALAHGLMQCEEGRGPFSGNSCADITNLK  
PWQLIHLYLQKVNFIITGFGDRVSFDKNGDALPIYDVMNWQPSSDGSIRVQTVGVVKNKGVTS  
MVLNLVEDAIYWNFETKPPQSMCSESCPLGTRKARRKGLPVCCYDCLPCGDGEISNRD  
ATECLVCPYEFWSNKEKDYCVPKQVEFLSYEDPLGISLTTASLLGICFCALVMVIFSHHHNTPI  
VRANSELSFLLLVSLLKCLFVLLFIGOPQLWTCQLRYAVFGISFVLSVCSILVKTMMVIAVFK  
SSRPEGKDAMKWFGLLOQRCTILVLTTIQVVICTVWISNASPTPHKNHQYIRSKIVFECAIGSV  
AGFSLLLGYIGLLAAISFLLAFLARNLPDNFNEAKFITFSMLIFCAVWIAFVPAYVSSPGKYAVAV  
EIFAILASSFGLLMAIFTPKCYIILLHPERNTKKAIMGR

>Dr\_16\_14\_F

MWTTLYIFLLFRCFSSESALRSGSCQLQGRFKLEGMYQDGDFFILGGLFHVHFFTVFPELSFO  
TEPEPPYCEKFNIEIFQQAQTMFAVDEINRNPNULLPNITLGYHLYDNCVRLGIAFRAAISLAS  
GTEESFSNLNCTGPPPVIIVGDPSSTPSIAISNILGLFRVPIVSHYATCSCLSDRKKYPSFFRTI  
PSDAFQVRAMIQILRYFGWTWVGLIYSDDDYGIYAAQSFQOEMLLFGYCVAFSAILPHDNNH  
RDIQRITAIQASTARVVVFSTSSFLIPLMEEVVQONMTGROWIASEAWTTSPVYHTPRFLPIL  
GGTLGIAIRRGEIEGLHDFLLRLIPSNDKKNIIIRIFWENIFGCSFEKWGTETTFGEQVKNICTGO  
EDLSTTDTPYTDVSGLRAYNVYKAVYALAHGLHDLMOCEEGRGPFNGNSCAETTNLKPW  
QLVHYLQNVNFTTGFGDQVSFDKNGDALPIYDVLNWHPSTDGSIKLHTVGLVKNKAAMEMV  
LTLDDDAIYWNFETRKPQSVCSSESCPPGTRQARRKGLPVCCFDCLPCGEGEISNATGAIEC  
TVCPDEFWSNPEKDQCVPKEVEFLSYEDPLGISLTTASLLGTCFCALVMIIIFALHRNTPIVRAN  
NSELSFLLLLSLKMCFLCVLLFIGRPQLWTCQLRHAVFGISFVLCISSILVKTMMVIAVFKASRP  
EGKGAMKWFATQQRCTVLVLTALQVVICVWLLTASPTPHKNNQYIRSKIVYECAIGSVAGF  
SLLLGYIGLLAAISFLLAFLARNLPDNFNEAKFITFSMLIFCAVWIAFVPAYVSSPGKYAVAVEIF  
AILASSFGLLVAIFAPKCYIILLHPERNTRNAIMGRE

>Dr\_16\_15\_F

ITLYLSLCLCFKHAYADSIHRLRSCQLQGRFKLNGMYQDGDFFILGGLFHVHFFTVFPELSFRM  
EPQOPYCEKFNMEGLQHAQTMFAFINEINKNPTLLPNITLGYHLYDNCVMLRMAFRAAMSL  
ASGTEDSYSNLNCTGPPPVIIVGDASSTPSIAISSVLGLFRVPIVSHYATCSCLSDRKKYPSF  
FRTIPSDAFQVRAMVQILKHFKWTWVGLLYSGDDYGVYAAQMFHKEMQLSGHCVAFSEILP  
NDHNPKDIQRIIRVIOGSTARVVVFALSSFLIPLMDEVVLQNMTCQWIASEAWATSLEYHTP  
RFLPFLGGTLGIAIRRGEIEGLHEFLLRIPSNDTSQNIIVRIFWENLFGCRFETGGLKTGREOE  
KMECTGOEDLSTTNTPYTDVSGLRASYNVYKAVYALAHGLHDLMOCEEGRGPFIGNSCADI  
TSLKPWQLVHYLQNVNFTTGFGDHVTFDKNGDALAIYDVLNWPSSDGSITVHKIGVYEGA

TTGMMMLTDADAIYWNFETKKVTNLPPLSVCSESCPPGTRQATRKG LPLCCFDCLPCGDGE  
FSNTRDAVECMMPDEFWSSPDKDOCVPEVEFLSYED  
LGISLTTASLLGTFCALVMIIFALHHNTPIVRANSELSFLLLLSLKLCFLCVLLFIGRPQLWTC  
QLRHAVFGISFVLCVSSILVKTMMVIAVFKSSRPEGKGMKWF GASQQRCTVLVLTALQVVIC  
AVWLSTASPTPHKNNHYFRSIIVYECAIGSVAGFSLLLGYIGLLAAISFLLAFLARNLPDNFNEA  
KFITFSMLIFCAVWIAFVPAYVSSPGKYAVAVEIFAILASSFALLLAIFAPKCYIILLHPERNTKNAI  
MGRE

>Dr\_16\_16\_F

MWFTLYIYICLSLNCISATLILKPSMCLLQRSFKLNGMYQDGD FILGGLFEVHFFTVPDLTFT  
TNPKSPYCEIFNMEGFQHAQTMAFAIEEINKNPKLLPNITLGYHLYDNCVMLGMAFRAAISLT  
SGTEESFLNLNCSGSPVIGVGDPSSTPSIAISSVLGLFRVPIVSHYATCSCLSNRKKYPSFF  
RTIPSDAFQVRAIVQVLKHFKWTWVGLLYSDDDYGVYAAQSFOQEMRQFGLCAAFSEFLPH  
DNNPRTIQHIMGVIOGSTAKAVVVFAPSSFLIPLMNEVV LQNMTGROWIASEAWATSLESHIP  
SFQPFLRGTIGIAIRRGEIQRLHDFLLRIRPSNDPKNYMLRIFWENMFGCSFGKGDTEGEOVI  
KVCTGQEDLSTTNTPYTDVSGLRAAYNVYKAVYALAHALHDLMECEEKGPFSKNSCADKT  
NLKPWQVVHYLQNVNFTTGFGDYVSFDKNGDALAIYDVLNWQPSSDESIRIYTVGVVKEGTE  
TGMVLTLDEDIAFWNFETRKP RSVCSVCSESCPPGTRRATRKG LPLVCCFDCLPCGDGEISNTT  
NAVECF LCPDEFWSNOYNNHCVPKEVEFLSYEDPLGISLTTASLLGTFCALVIFVFALHRNT  
PIVRANSELSFLLLLSLKLCFLCVLLFIGRPQLWTCQLRHVVFGISFVLCMSSILVKTMMVIAV  
FKSSRPEGKGAIKWFGAVQQRSTVVVLTVLQVLICAVWLSTASPTPYKNNQYIRSKIVYEC AI  
GSVVGFSMLLSYIGFLAAASFLLAFLARNLPDNFNEAKFITFSMLIFSAVWIAFVPAYVSSPGK  
YTVAVEIFAILASTFGLLIAIFAPKCYIILLHPERNTKNVIMGRE

>Dr\_9\_13\_FN

MSIHVLSWLTLSVPVLLLWPVCGSGTEVTPLETCVYLITPOYSDELGT YQDGDV IIGGLINLHN  
LAATPDLSFTRKPGLAQCLEFQERTYRWFQAIVFTVEEINQHPSLLPGVKLGYHIMDSCSRYP  
HSLTAAMSMISGGNKTCGPTKPAKLLIGDSSSTQSILLSTTLVPLKIPMISYLAGCPCLSDRQK  
YPNFFRTIPSDFYQARTMVQIAKRFGWTWIGAVIADSDNGHGT LQALEEEIKGTGICLAFYHT  
LYRERLQKDVAFARTVQASSARVILVLAWYTDVEAFLXXXSILHTEHIIQSRFYRSYECGAL  
FTVVKWISWQIHNSLLTDNNNNNNNNYYYYYYYYYYYKALXXXXDL  
QLLQHVKDVOYTTQLGEEFYXLEGGIPPVYDLVNWQIAPDGS LQYAFIGHVDGNQLSINDSAI  
TWPGDSGKVPISVCTSECPPGTRKAIKKGLPVCCFDCLPCTEGEISNSTGSIKCYRCPKEFW  
SNSYKNECVARETEFLSVKETMGITLMSVAVSGAVMTT TAVIFLYHRNTPIVKANSELSFLL  
LLSLKLCFLCALVFGQPSLWSCRIOQA AFGISFVLCISCILVKT FVVLI AFHSTRPESSALIKWF  
GLGKQRGIVLVFTCVQVICAIWLCVSPPLPYQNF GMHRSKVILECTIGSVVGFTCVLGYIGFL  
ATVCFLLAFFARKLPDNFNEAKYITFSMLIFCAVWVAFVPAYVSSPGKYSVVVEVFAILASSFGL

LFCIFVPKCYIILLKPENNTKKFLMGKE

>Dr\_V2R2\_F

MDLTGLSYEGRFLLVLCMISYLFTPTDAEGSCKLKAKFNLRGYKEVEKTTWIGGMFPVHRSL  
VSTDSNTTDPPEVDCQGFNFRAFRWAQTMLFALKEINSRTDLLPKTELGYVIYDSCFTISKA  
VEGTLTFLTGOEAVPNYRCGNGPPLSALVGAGGSDLSIATARILGLYYFPOQVSYESSCSVLE  
SRFQYPTFLRTIPSDENQSVAMAKLVLRFGWTWVGTIAAEDDYGKYGIKRFKEVVEEAGVCIS  
FSETLPKISNPEAIQRIVQTVHDSATAIIVFSSDVDLSPLVEALLOSNVTNRTWIASEAWVTS  
AISRQPNVLSLLGGTIGFAVKRAEIPGLKKHLLSISPFNDSLTEEFWGIVFNCTTNYTLILKGM  
RCTGEEMLGTVDNVSDVSQLRITYNVYKAVYAVAHALHNLEQCKTGSGPFENDTCADITNF  
EPWQLMYLIHLRFTVPHTGEELFFTNGEVEGFYELLNWQSDSNGGITYTHIGYYNSTAAPE  
DKLVINNNNSIWNVNNVNLKAPRSVCSERCQPGTRMGIROGEPVCCFDCIPCADGEISNTT  
DAR GCIQCDGDYWSNANHDECVPKTIEFLDFSEPLGITLIAIAAFGALATIVVAIIFLMHLN  
TPLVNVN DPLLTFSLLLGLVITFLCSIVFLGKPMWSCMTSOMALAVGFALILSSLMGKS  
ALLMLRARAV KAVKAAAKAAKAAAAASEQSPDTAVFAPAIPQKNDVDPIHPRHQRAIMIL  
CTLIQVVGCTAWLI LMPHPVKNTGVQNIKIILECDPGNIIFICSIFGYDILLALVTFAFAF  
VARKLEDHFNEGKSVTFG MLVFFIVWSSFPAYLSTRGKFMVAVQIFAILASSFGLLACVFI  
PKCYVLLVKPERNKEEMMIPR

>Dr\_9\_7\_F

MLLYLCTLLLFFKLKVS VGNASCKIMGEPKYPLLFKDGDVTIGALFPVHSIETAPSFEFTQKPO  
LLSCSSVNLDRDFRLAQILIFAIEEINRSELLPKLSLGYKIYDTCSSKLSSMSATM  
MNSFEFA GRDKCNGQTSVHAIIGETESSATVILTRTTGPFKIPVISHAASCECLSSR  
KEYPSFFRTISSDYH QGRALAYIVKHLGWSWVGAVNSDNDYGNYGMAIFLNTAHKEGIC  
VEYSEKFYRTEPEKLLK VVDTIKKSTAKVIVAFISFLEMRLLEQLSAENITGLQIVGVEG  
WTTSKSLITPKTLNVLRGSLGF AMRKIYIEGFAEYVLKPFWDTAFCIPNQRNDSWVILN  
CSRYQDLLVLKNYIEDVPEHRFSINV YNAVYAVAHALHSLFKCKEQEGCEKDLLTQPOQ  
VVDALKKVNFTVKMGDRVWFDSTGATLA QYEVVNWQQNSDGSVNFKKVGYDASLPPDQ  
RFVLNIKEILWAGGNLKANPRSVCSSECP PGTRKAAQKGRPICCYDCIPCADGEISNDT  
DSNNCKQCQGEYWSNADKNKCVQKSVEFLS FTEVMGIVLVFFSLFGAGLTVLVAILFY  
SKKDTPIVKANNSELSFLLLFSLTL CFLCSLTFIGOPT QWSCMLRHTAFGITFVLCISCV  
LGKTLVLMFAFKATLPGSNIMKWFGPVQQRLSVLAFTFIQV LICVLWLSISPPFPHKNM  
KYEEKIILECSLGSTIGFWAILGYIGLLAALCFILAFLARTLPDNFN EAKFITFSMLIFCA  
VWITFIPAYVSSPGKFTVAVEIFAILSSSISLLLCIFAPKCYIILLKPEONTKQY  
MLGKT

>Dr\_8\_1\_YP

EPLVALLHMVIAIMTFSKANETTCTLOGEPVLPPELWKDGDIIVGGVFSFHSSWEVRQ  
LTYTFVP PPLKCISLNRDFQYAQSMLFAIEEINNSSTLLPGVSLGYKIYDTCGSVAVG  
VRAAMALANGH EKISVEGPCTKHAEVQAILGDTTSSACMAITKSIGPFKLPLISHYATCE  
CLSDKVKYPSFLRTIA

SDHYQSRALAEVLRHFGWTWVGALRTDDDDYGNSGMATFTKVAEQMGICLEYSLPFFRITYE  
DKVMRIIEQIKSSTSRSRVIVGFLAHWDLEVLLHKFVEYNITGYQWVGTEAWISDSVIASMDTHHI  
LOGAVGLAIPKTKVTGLQEFILNITPLKSSGGAIFFSEFWALFOCKYSNKDTSVSINACTGKEE  
LSQVENLFTDMSLMPIFSNVYKGVYAVAHALHELLGCKDKCALKKQPDVTFCLKHIRKVHFK  
TKDGEEVYFDENGDPVAKYDIINWQOSTKQHYEFVTVGFYDASFMGMDRLAVNMSSIFWAI  
NSTKVPVSVCSSESCPHGTRKAVKKGKPICCYDCISCTEGEISNTTG

>Dr\_9\_8\_F

MLLFLYSVLSLYHLNKAENTLCQMIGNPKYPLLSKDGDITIGALFVIHSEVSLPSFAFTQKPN  
LLSCSSLNIKDFRLAQTMIFAIEEINKNTNLLPNISVGYQIYDTCGSRFHSMASATMALMNGPK  
NSEGYTCNEQSSVHAIVGETESSNTIILSRTTGPFKIPVVSCKYSTTCECLSNRKEFPSFFRTIA  
SDYHQSRALAYIVKHFHFGWTWVGAVNSDNDYGNGMATFQKTAKEVQICVEYSVKFIRTETE  
KIRNVVNIKKGTAKVIVAFVTGFEMKSLLEQLSSQNITGLQMIGVEAWITSKTLITSKSFHVLG  
GSLGFAVRKIQIEGFADYVMKAFWDTAQSFNSADLNYSQYQDLLLLVKNYNEDVLEQRFVSY  
VYKAVYALAHSLHSLLRCTEQGGCGKALTIOPHQLVEALRKNVFTVKMGDQVWFDSTGGVIA  
QYDVVNWQQNSDGSVQFQSVGYDASLSPDQRFMLNTEKIVWAGGQLEKPRSVCSSESC  
PGTRKASQKGRPVCCHDCIPCADGEISNETDSNNCKQCPGEYWSNANKNKCVTKAVEFLS  
FTEVMGIILVFFSLFGAGLTVLVAILFYSSKDTPIVKANSELSFLLLFSLTLCFLCSIPFIGRPTQ  
WSCMLRHTAFGITFVLCISCILGKTIVVLMFAFKATLPGSNIMKWFGPVOQRSLVLAFTLIQGLI  
CVIWLTKSPFPYKMNMYFQEQIIECSVGTIGFWAVLGYIGLLAVLFCIFLAFLARTLPDNFNE  
AKFITFSMLIFCAVWITFIPAYVSSPGKLTVAVEIFAILASSFGLLFCIFAPKCYIILLQPEQNTKQQ  
MMAKT

>Dr\_9\_9\_F

MILYFYTILFLRCFOAKTENAFQIIGEAKYPLLSKDGDVTIGGIFAIHSKETLPSFEFQOKPQP  
LLCSSVNLRFRLAQIMIFAIEEINKSENLLPNVSIYRIFDTCGSRLLSSMSATMGLMNELKFA  
AGETCNGQSPIHAIIGETESSATVILSRTTGPFKIPVISHSASCECLSNRNDYPSFFRTISSDYH  
QGRALAYIVKYLGWSWVGAVNSDNDYGNYGMAIFLETAOKEGICVEYSVKFYRTETEKLRV  
VDTIKKSTAKVIVAFVFSFIEMGLLIEQLSIQNITGFQIIGVEGWITSKNYITTNSFHSMGGSLGLA  
LRKIHLEGFLDYVTKSFWSTAFPCSQTEGILPTVGCSSKYKDLLPLKNYTEDVPEHRYSSHVYK  
AIYAVAHSLHSLKCKEGEDCEKGHATQPOQVVEALKKNVFTVKFGDRVWFDRTGATVAHYE  
VVNWQQDTDGSFQFKQVGYDASLPPDQRFVLNIESIWPGGNLEKPRSVCSSESCSPGTRK  
AAQKGRPVCYDCVPCADGEISNETDSVNCKQCPREYWSNGEKNKCVLKAIEFLSFTEIMG  
IVLVCFSLFGVGLTAVVAILFWSKMDTPIVKANSELSFLLLFSLTLCFLCSLTFIGRPTWVSCM  
LRHTAFGITFVLCISCVLGKTIVVLMVFKATLPGSNVMKWFGPTQQRSLVLAFTFIQVLICVLW  
LTISPPFPNKNMYYKEKIIIECSLGSTISFWAVLGYIGLLAVLFCIFLAFLARKLPDNFNEAKFITF  
SMLIFCAVWITFIPAYVSSPGKFTVAVEIFAILASSFGLLLCIFAPKCYIIICKPEQNTKQHVMGKT

>Dr\_9\_10\_F

SGMFLFYTILLFHELLHTKVENSLCRIMGDSNYPLFSKNGDVSIGGIFAIHRKETLPSFEFMQKP  
QPLSCSSVNLDRDFRLAQTMIFAVEEINRSKSLLPNVSIGYKIYDTCGSRLSTMTAIMGLMNGO  
DFSTEDRCNGQSRLHAIIGESESSATIVLSRTTGPFRIPIVISHSSSCECLSNKKDYPSFFRTISS  
DYHMSRALVYIVKHLDWSWVGAVNSDNDYGNNGMAIFLKAAHEEGICVEYSVKFYRTEPEK  
LKKVVDTINKGTAKVIVAFVSFVEMGLLIDQLSIQNITGIQMIGVEPWITANTYITSNSFRAMGG  
SLGFATKYIYIEGFAEYVMTPFWNTAFPCSESDRNHSHYELICSRYEDLLALKNDNKDVNEHR  
YSSNVYKAVYAVAHS LHGLLNCKEQEGCEKGLTIQPOQVVKALKNINFTIKSGDSWVFDNTG  
SVVALYEVVNWKKT

DGSFQFKSVGFYDAMMPYKLNRLNTKNIVWAGGOLEKPRSVCSSESCAPGTRKAAQKGR  
PVCCYDCIPCAEGEISNETDSINCKQCPCGEYWSNTERNRCVIKAVEFLSFSEVMGIVLVIFSLF  
GAGLTVLVAVLFYSKKDTPIVKANNSELSFLLLFSLTLCLCSLTFIGOPTKWSCMLRHTAFGIT  
FVLCISCVLGKTIVVLMFAKATLPGSNVMKWFGPVQQRLSVFAFTLIQVLICVLWLTISPPFPY  
KNMKYYYKEKIILECNLGNITIGFWAVLGYIGLLAALCFLAFLARKLPDNFNEAKFITFSMLIFCA  
VWITFIPAYVSSPGKFTVAVEIFAILSSSFGLLVSIFAPKCFIILLKPEQNTKQHVMGKT

>Dr\_9\_6\_F

MLLFYIFLHFTLIRTKAGNGLCQMMGDPKYPLFSKDGDIAGLFAILSKETLPSFQFTQKPO  
LLSCSSVNLDRDFRMTQIMIFAIEEINRSKSLLPNVSIGYRIYDTCGSRMSAMSATMALMNGPE  
FTADKICNGESPIHAIIGETESSATIILSKTTGPFKIPVISHSASCECLSNRKIYPSFFRTIASDYH  
QGRALAFIVKHFGWSWVGTVNSDNDYGNNVMAIFLNTAQKEGICVEYSVKFYRTEPEKLLK  
VVETIKKSTAKVIVAFVSLVEMGLLIDQLSIQNITGFQVIGGEGWITTKSLINSKSFHVLGGSLGF  
AFRKHIIIEGFADYVIKTFWERDFPCLTNEGNYSQYALTCSSYQDLFTLKHYNEDIPEQRYASNV  
YKAVYAVAHS LHNLCKENEGCEKSLTMQPQOVVEALKNVNFTLKFGRVWVFDSTGGAVA  
HYEVDNWQDSDGSFQFKKVG YFDASLPPDQSFMLNTKNIIWSSGGQLERPRSVCSSESCPP  
GTRKASQKGRPVCYDCIPCAEGEISNETDSVNCKQCQGEYWSNVEKNKCVLKAVEFLSFT  
DFMGIVLVFFSLFGVGLTVLVAILFYSSKKDTPIVKANNSELSFLLLLSLTLCLCSLTFIGRPTW  
SCMLRHTAFGITFVLCISCVLGKTIVVLMFAKATLPGSNVMKWFGPVQQRLSVLAFTLIQVLIC  
VLWLTMSPPFPYKNMKYYYKEKIILECSLGSVIGFWAVLGYIGLLAALCFILAFARTLPDNFNE  
AKFITFSMLIFCAVWVTFIPAYVSSPGKYTVAVEIFAILASTFGLLFCIFVPKCHIIIFKPEQNTKQ  
HMMGKN

>Dr\_5\_2\_YN

FNVFSILVSIOPYIYFMSAEVKTDKYQHPQDVTGXXXXAL  
HFSCIDSLIYS  
IFFFFCSLSLGEFQNAQTMIYAIEEINKRADIISGQSLGYRIYDSCGSTDALKASLSLVNGEN  
ASQLYCQRPLTVQAIIAETYSTPTIAISATVGLLHLPVVS HYATCACLSDKKKHPSFFRTIPSDY

YQSRALAKLVQYFGWTWVGALCSDNDYGHNGMNTFIKAATEFGVCVEFSESFFRTHPREEI  
LRIVNIVKKSSSKVIVAFVSYADMEVLLLELAKQONITGLOWIGSESWISDMNIATGKWOYILRG  
SMGFAIPKSEIOGLKEFLTKVNPSSNIYLYKELWESVFOCRLSPEQSSSESKSMCKGNESLNH  
VQNQYTDVTELOQPNNVYKAVLAIAHALNSSVGCLKWDKNQRECLEKINNTWQVLQALREV  
SFFTETGEKVFFDKNGDPAARYDLLNWQOGEEGATKFKVKGIFYDASLOPEFOLSFNITIM  
WAKVPVSVCSSECPMGTRKAVKKGKPICCYDCIQCAEGEISNKTDSVMCLKCPPEFWSNK  
WRDTCVPKLVFELSFEDVMGIVLIIFSLLGVSFTLGIAIIFVHKDTPIVKANNSELSFLLLSLTL  
CFLCSLTFIGRPTEWSCMLRHTAFGITFVLCISCVLGKTIVLMAFKATLPGSNVMKWFGLPQ  
QKLSVITFTLLQVVICVLWLTLSPPFPYMMNYYQERIILECNLGSAGFWAVLGYIGLLAILCF  
ILAFLARKLPDNFNEAKFITFSMLIFCAVWIL

>Dr\_16\_19\_F

MWISLNIFLYLSLNCIFAASVVNPGTCQLOGHFKLNGMYODGDFILGGLFEVHFFTLFPKLSF  
KSEPEPPYCEKFDMESFQQAQTMVFAIDEINKNPNULLPNITLGYHLYDNCVMLGMAFRAAIS  
LASGTEEYFSNLNCTGPPPVGVDGPGSTPSIAISSVLGLFRVPIVSHYATCSCLSDRKKYPS  
FFRTIPSDAFQVRAMVRILSHFGWTWGLIYSDDDYGIYASVSFQOEMQQFGSCISFSEILPH  
DNNPKDIQRIMEVIKASTASVVVVFSTSSYLMPLIDEVVLQNLTGROWIASEAWATSPVFHTPR  
YLPFLGGTLGIAIRRGEILGLOEFLLHIHASNNPKDNMLKIFWENMFRCFSFETRSTIGEQE  
KSICTGHEDLSTTKTPYTDVSGLRASYNVYKAVYALAHALHDLMECEEGRGPFDGNSCGNIT  
NLKPWQLVHYLQKVNFKTGFGDHVSFDENGDALIYDVLNWHPSSDGSIRLHTVGVVNEGA  
GTGKVLSDDESALYWNFQTKNPPRSVCSASCPPGTRQAMRKGLPICCFDCLPCGDGEISN  
ATDSTECVTCPDEFWSNFDKNQCVPKEVEFLSYEDPLGISLTTASLLGTCFCALVMIIIFALHLN  
TPIVRANSELSFLLLLSLKLCFLCVLLFIGQPQLWTCQLRHVVFGISFVLCISSILVKTMMVIAV  
FKSSRPEGKGTMKWFGAAQQRCTVLVLTALQVVICAVWLSNASPTPIKNNQYIRSKIVYECAI  
GSVAGFSLLLGYIGLLAAISFLLAFLARNLPDNFNEAKFITFSMLIFCAVWIAFVPAYVSSPGKY  
AVAVEIFAILASSFGLLVAIFAPKCYIILLHPERNTKKAIIRE

>Dr\_9\_14\_YP

MSVFFCTLLIFFQLYAKAEKPICIMMGDPKYPLLSKEGDISIGAVFPVHSIETLPLFKFTOKPQL  
LSCSSVSIRDFRMAQIMAFIEEINRNESLLPNVSLGYQIYDTCGSGLSLMGANMALMNVOE  
FASRGSCNGQSPVHAIIGETESSNTVILSRTTGPFKIPVISPSASCECLSNRKEYPYFFRTIASD  
YHQSRALAYIIKYFGWSWVGAVNSDNDYGNHGMAIFLSTAEKEGVCVEYSVKFORTEPEKL  
KKVVDTIKKGTSKVIVAFLTEFEMKNLLEYLIQNVTGLQVIGVEAWITANSMIKPNFSHVLGGS  
LGFAVKKLNIEGFEDYVTKAFWETAFCPSQTSQKENSQYKLCINIRDLLVLKNDNKDVPEQR  
YASNIVYKAVYAVAHSLNILKCRENGACETDMKIQPOQVVEALRKVNFTIKMGDCVWFDST  
GAVVAQYEVVNWQPDYNGSIQFKPVGYYDASLPPNQRQFVINTENIIWAGGQLKV

>Dr\_9\_11\_F

MVSFIWTLVVPLQAKAENSLCRMMGQNINPLISKEGEVTIGALFPIHSIEILPSFEFTVKPQL  
LSCSSVNLDFRMAQTMTFAIDEINKNQSLLPNVSIGYRIYDTCGSRLSSMSATMALMNGKE  
FSAEDKCNGQSALHAIIGETESSATVILSRTTGPFKIPVISHSATCECLSNRKNHPSFFRTIASD  
YHQSRALAYIVKHFGWSWVGAVNSDNDYGNNGMAIFLNTAQEEGICVEYSEKFYRTDPEKL  
RKVVDTIKNSTAKVIVAFLLTSLEMENLLOELTKANITGLOIIGVEAWITANSLLTPNSFRVLGGSL  
GFAVPKVNIQGFSNYVIKDFWETAFCSETEINVSQYSSLSCNSYDDLLLLKNYNEDVPEQRY  
ASNVYKAVYAVAHALHSLKCKVNEGCKKDLKIQQVVDLKEINFTINMGDRVWFDSTGA  
TIAQYEVINWQQGSDGSIQFKTVGYFDASLPHDQRFVLNTEIIWTGGQLEANPKSVCSENC  
PAGTRKAVQKGRPVCCYDCIPCADGEISNDTDSVNCKQCPGEYWSNAEKNRCVLKTVEFL  
SFTEVMGIVLVFFSLFGVGLTVLVAIFYSKKEPIVKANNSELSFLLLFSLTLCLCSLTFIGRPT  
EWSCMLRHHTFGITFVLCISCVLGKTVVLMFAFRATHPGKDIMKWFPGVQORLSVIALTLIQV  
LICVLWLTISPPYPYKNMKYFKEKTILECNLSTIGFSAVLGYIGLLAVLCFFLAFLARTLPDKF  
NEAKFITFSMLIFCAVWITFIPSYVSSPGKLTVAVEIFAILASSFGLLFCIFAPKCYVILLKPEQNT  
KQHIMGKI

>Dr\_9\_12\_F

MSVFLYTVLIFIFYTKAENPLCOMMGNPKFPLLSKGDVNIAGIFSVHSTEILTSFTYTQKPQL  
LSCSSVSLRDFRMVQTMIIYAIIEINRSLGLLPNITVGYQIYDACGSRLSAMSATMALMNGPEF  
TWRDRCTGQSPIHAIIGETESSATVILSRTTGPFKIPVISPSATCECLSNRKEYPSFFRTIASDY  
HQSRLAYIVKHFGWSWVGAVNTDNDYGNNGMMTFLNTAQEEGICVEYSVKFYRTEPEKLO  
KVVETIKKGTAKVIVAFLLTSSEMYNLLLEQLSIQNITGLQMIGVEGWITAKSLITPNSFHVLGGSL  
GFAVRKTAIEGFADYVIKSFWETAFCPTMTIGNSSQYSLSCGIYQDLLLLKNYNEDVPEQRYS  
TNVYKAVYAVAHSLHSLKCKEDGCKKGLAIQQVVGALKKINFTLKLGDIVSFDSTGATVA  
QYEVVNWQKDANESIKFKPIGYDASLPPHQRFLHTENIIWAGGQLDRPRSVCSSESCPPG  
SRKAAQKGRPVCCYDCIPCAEGEISNOTDSNNCKQCPGEYWSNAEKNKCVLKDVEFLSFT  
EIMGIVLVIFSLFGAVLTALMAILFYRKKDTPIIKANNSELSFLLLFSLILCLCSLTFIGRPTWESC  
MLRHHTAFGITFVLCISCVLGKTIVVLMFAKALPGNNIMKWFPGVQORLSVFALTLIQVVICVL  
WLTMSPPPHKLNKYYQEKIVLECNLGSNIGFWAVLGYIGLLAVLCFILAFARKLPDNFNEA  
KFITFSMLIFCAVWITFIPAYVSPPGKFTVAVEIFAILASSFGLLFCIFVPKCYIILCKPEKNTKQHL  
MGKV
