# Supplementary material for: Evolution and origin of vomeronasal-type odorant receptor gene repertoire in fishes
Source: PubMed Central journal article supplement (PMC1601972; doi:10.1186/1471-2148-6-76), 2006-10-03
Supplement: 1471-2148-6-76-S8.pdf [file 1471-2148-6-76-S8.pdf]

>MF\_12\_1\_F

MLRRARLLFFGFFCSVVHNTLOGOGTQCQKNPSATSLSVLQKRGDIILGGLFSLHDMVVEP  
RLNFSSPSPPTKCTRFNFRTRFRWMQTMIFAIEEINRVGALLPNFTLGYKIYDSCSTPHQALRA  
ALELMGGESRSGLEGETLSQDTCHGAVPVVIGDGGSTQSLVVARFMGVFHVPOVSYFSSCA  
CLSNKKEFPSFLRTMPDFFOVGALAQLVKHFGWTWVGIVAGDDAYGRGGTKIFADEVKIKL  
GACVAFNEIIPKNPSQSEISPIVDSIRSSGVHVILVFAVEQDVAAFFDEVVRSGLTGMQWLASE  
AWSTAAILS NPRKYHHILOGLTGF AIRGVNIPGFRDFLLRLNPSSP NASEDPFLIPFWEEVFQC  
SLD TOADDQKADGKPSCTGTEDLKNIQNTYTNVDQLRISYNVYKAVYAVAYALKAMRSCVR  
GEGPFPQMTCPDADNVQPWQLLHFIKLVQFQNAFADEVKFDENG DVAAMYDLVNWQLKPN  
GEMDFVTVGKFDEATHVSGKKLOIQEEDILWNGNHTKVPLSVCSSICPPGTRKAIRPNFPICC  
HDCVACTAGKISNQTDTIECVRCLSEFWSNAERTACVPKQVEFLSFSDTMGITLMTISLTGSL  
STSVVVLVFFLNRNTPIVKANNSHLSFLLLFSLTLCFLCPLTFIGQPSKWSCMLRHTAFGISSVL  
CISCILGKTIVVLF AFKATLP GSKIIK WFGTAQOKSIITFSTLVOCGKTDLFCVQVIICAVWL VVAP  
PRPHQMMPRESAVVILLCDEGSLVAFACVLGYIGLLACSCLLLAFLARKLPDNFNEAKLITFS  
MLIFCSVWLAFIPAYISSPGKYATVTEVFAILASSYGLLGCIFAPKCYIILLRPGKNTRQQIMLRI

>MF\_9\_1\_F

MKMAPLLTGLFFMGLLLACDTAGEDASDCHVLESPELPLLSKGDGDMIGGAFSIHASKIAQPS  
LSFTEKPTPFTCSSINLREFRFAQTMIFAIEEINKSKHLLPNV SIGYRIYDNCGSTLSSMRAVMA  
LMNGDELLIEKNCSGQSAVHAIIGESESSSTIVLSRTTGPYQIPVISHSATCECLSSRKEYPSFF  
RTIASDLHQSRALAQLVKHFGWSWVGAVNSDSYDGNNGMAIFLSAAQEEGVCVEYIEKFDR  
AEPEKLLKVVEVIRKSTARVIVAFLAHVEMNNLLEQLNVHNITGRQFIGVEAWITADSLVTPTSF  
SVLGGSLGFAVQKTNISGLNTFLVEDFWETDFQCEENHIDVASKSCKENQDLMKLRDYND  
VEELRYSSNIYKAVYAVAHSLSIMKCSDSQGC DKTSEVKPWQVIEALKQVNFIIKNGEQWFF  
DSTGAVLARYEVVNWQQRSTG SVHFEPVGYDASLPPGQK FVLNTEAMWPGGSTKLPVS  
VCSESCRPGTYKVL ERGKPVCCFHCLPCPDGEISNSTDSNDCNQCPEEFWSNQIRDACVP  
KNVEFLSYTEDMSKILMFFTLFGVVLTVTAVLFLINRDTPLVKANNSELSFLLLFSLSLCFLCS  
LTFIGRPTEWSCMLRHTAFGITFVLCISCILGKTIVVLM AFKATLPSSNVMKWFGPVOQRLTVF  
SLTIIQVIICILWLTINPPFPFKNMKIFREKIILECSLGS SLGFWAVLGYIGILALLCFVLAFLARKL  
PDFNFNEAKFITFSMVIFSAVWITFIPAYVSSPGKLTVAVEIFAILASSYGILFCIFAPKCYILALKPE  
LNTKKSMLGKS

>MF\_10\_3\_YP

MYVYIFVMSLLLVMEILAEDDSAVCEMLGSPEFPLLSKSGDIIIIGGAFSVHSQIVASSFSLSDA  
PDPLICTRLNFRFRFAQTMIFAIEEINKSSSLLPNISVGYKIFDSCGSTLPSTRAAMGLINGQE  
RSFGKTCSGHSTVHVIVGTSESSSTLVLSQIAGIFQIPVISHFSTCACLSNRKEHPSFFRTIPSD  
YYQSRALAQLVKYFGWTWVGAVRSDNDYGNNGMATFIEAATKEGICVEYSEAIARTASKEQV

ERVVRVISRGTARVLIAFLSYDEMALLEAALSQNLTLGLOWVGSSESWITAHHLATMKYSGILY  
GSIGFAIKKAKIAGLQDFLLQVHPSQDPQNHILKEFWEEFTGCSFOSSLQDTKQCSGSERLR  
DIKNPFTDVSELRISNNVYKAVYAVAHAMHSMLKCGENSETVNASCTLKSILOPKEVVKHIQD  
VNFSLKSGEKVYFDERGDPAATYQLVNWQRNPAGDIVFVVVGSYDASLONGKEFTMNGLNI  
TWTESFERPVSVCSSESCPPGFRQAIKKGKPICCFSCITCAAGEISNCT

>MF\_10\_4\_Y

MCFWISVMMLMVMVIMGILAEETANCELLGSPVLPKSGDIIIGGAFSVHSEMAASSLSLS  
DAPDPLICTRVNFREFRFAQTMMFAIEEINNSSSLLPNISIGYKIFDNCGSTLPSTRAAMGLING  
QERNFGETCSGHSSVHAIVGTSESSSTIVLSQIAGVFQIPVISHFSTCACLSNRKEHPSFFRTI  
PSDYYQSRALAQLVKYFGWTWVGAVRSDNDYGNNGMATFIEAATKEGICVEYSEAIARTASK  
EQOVERVVRVISRGTARVLIAFLAQSEIDILLEEALSQNLTLGLOW

GSESWITAXXXXIF

KYVLFSPPHLLIAISKVYLFGNLKNLQKQKLS\*WQFNAKLMPLSPYQSFFYFFI

YLTIIAQISRSEKIL

FFLLSQRPVSVCSSESCPPGFRQAMIKGKPICCFTCINCA

GEISNSTNSAECSPCPLEYWSNEDHNKCVPKVLEFLSYEETMGTLTAFSLFGAGLTLVVSFV  
FFWFRHTPLVKASNSELSFLLLSLTLCLCSLTFIGRPTDWSCMLRHVAFGIAFALCISCILTK  
TITVIAFKARTPVNTVPOCLASHQRMGVVGGFLFCRC

>MF\_10\_1\_F

MNNGICVMVLFMLTMGVIAEDETALCELLGSPVLPKSGDITIGGAFSVYTQTPKSSPSLT  
ETPEPLICSRIREFQFAQTMMFAIEEINNSSSLLPNVSVGYKIFDSCGSTLPSTRAAMGLIN  
GQERTFGKTCTGQSTVHAIVGASKSSSTIVLSQIAGIFQIPVISHFSTCACLSNRKVHPSFFRTI  
PSDYYQSRALAQLVKYFGWTWVGAVRSDNDYGNNGMATFIEAATKEGICVEYSEAISGSSS  
YEQVERVVRVIKTGTAKVLVAFLDSDGMDILLEEALRQNLTLGLOWVGSSESWITAHHLATMKYS  
GILYGSIGFAIKKAKVAGLQDFLLQVHPSQDPQNHILKEFWEEFTGCSFOSSLQDTKQCSGS  
ERLRDIKNPFTDVSELRISNNVYKAVYAVAHAMHSMLKCGENSETVNASCTLKSILOPKEVVK  
HIQDVNFSLKSGEKVYFDERGDPAATYQLVNWQRNPAGDIVFVVVGSYDASLQSGKEFTMN  
GLNITWTESFERPVSVCSSESCPPGFRQAMIKGKPICCFSCITCAAGEISNSTNSAKCSPCPL  
GYWSNEDHNKCVPKVIEFLSYEETMGTLTAFSLFGAGLTLVLLFVFFWFRHTPLVKASNSEL  
SFLLLSLTLCLCSLTFIGRPTDWSCMLRHVAFGIAFALCISCILTKTITVIAFKARTPGNRVP  
QCLASHQRMGVVGGTFLQVLVCVAWLAQAPPFPHKNTIYALERIILECNLGSIGFWVVLGYI  
GLLAVLCLILAFARKLPDNFNFAKFITFSMLIFSAVWVTFIPAYVSSPGKFTVAVEIFAILASSFG  
LLFCIFAPKCYILLKPERNTKSHIMGRD

>MF\_10\_2\_F

MHDCICVMVLFMLTMGVITEDETALCELLGSPVLPKSGDITIGGAFSVYTQTPKSSPSLTE

TPEPLICTRISFREFRFAQTMMFAIEEINNSSSLLPNVSVGYKIFDSCGSTLSSTRAAMGLING  
QERTFGKTCGQSTVHAIVGASKSSSTIVLSQIAGTFQIPVISHFSTCACLSNRKVHPSFFRTI  
PSDYYQSRALAQLVKYFGWTWVGAVRSDNDYGNGMATFIEAAPQEGICVEYSEAISGTSL  
YEQVERVVRVIKTGTAKVLVAFVFLGYDEMDILLEALRQNLTGLOWVGSESWITSSNLALNRYS  
GILTSIGFAIKKGGKIAGLODFLLQVHPSODPQNHLKEFWEETFGCSFOSSLHGTKQCSGSE  
RLRDIKNPFTDVSELRISNNVYKAVYAVAHAMHSMKCGENSETVNASCTLKSILQPKEIVKHI  
QDVNFSLOSgekvsfDERGDPAATYQLVNWQRNSAGEPVFVAVGSYDASLPNGKQFTIEEM  
NITWVGASRQRPISVCSECLPGFRQAVIKGKPICCFSCIACAAGEISNSSNSADCSPCPLEY  
WSNEDHNKCVPKVIEFLSYEETMGTLTAFSLFGAGLTLVVSFVFFWFRHTPLVKASNSELSF  
LLLLSLTLCFLCSLTFIGRPTDWSMCLRHVAFGIAFALCISCILTKTITVVIKARTPVNTVPOC  
LASHORMGVVGGTFLOVLVCVWLALAPPPHKNMYYAERIIECNLGSIGFWVVLGYIG  
LLAVLCLILAFARKLPDNFNEAKFITFSMLIFSAVWVTFIPAYVSSPGKFTVAVEIFAILASSFGL  
LFCIFAPKCYILLKPERNTKNHMMGRD

>MF\_7\_1\_F

RGTMLLIADLLFFLVAVREGKPTCQTYGKELSSFFKEGDITIGGIFSFHQSPVTASSTLELNP  
GSIQCKGLDQGELOAYTMMFAIEKINNSSELLPDVTLGYRIFDSCPSIPLSIRASLSLMNMY  
KGEKSSCDKPSVHAVIGDSTSTIGIARTLPGFHIPVISHSATCACLSNRREYPSFFRTIPND  
IFQSKALAKLVKHFGWSWVGAIRTNNDYGNGGMATFLDSAKKEGVCVEYSVAIYRTDPRKH  
FLEVNIKKSTSKVIVAFADGTDLDILFKELHAQSVTGLOWVGSEGWITYRQIATPMNYAVVQ  
GAVGFAALSSPIPLQEFNRNSKPSITEGNQGLVELWEMVFNCTLNKTEAHAQDYVAPCN  
GIETLRNINLPFTDVSDTSLNNVYKATYAIHAHALNLLINCENGQGPFDNKSCADRKNIQPWQ  
VLYYLSRIRFTADTGENVFFDDLGDVPARYALVNWQIDETGQTRFQITIGYYDASRPEGQOQFDI  
NPGVSAWAGENHEVPKCSICESCLPGTFRTFIKGPICCFDCIPCAEGEFNSSTNAVNCHK  
CHPEYKSSEERTSCDLKAIEFLTFTELMGILLVAFSIFGACLAMIVAVIFYHHRKTPMVKANNSE  
LSFLLLFSLSLCFLCPLTFISRPTKWSCMLRHSTFGIIFVLCMSCVLGKTIVLMAFNATVPGS  
NVIKWFPGPVQQRVSVLTFTIIOVLICIMWLTINPPYPHKNVKYYKDKVILEC SHGSSLGFWAVL  
GYIGVLSLLCFGLAFMARKLPNNFNEAKFITFSMLIFCAVWVTFIPAYVSSPGKFTVAVEIFAILA  
SSYGM LCCIFFPKCYIILFKPEKNTKKHLMGKE

>MF\_8\_1\_FN

MCSQKWPEQGCAFLQLLLLVSFSQSAETECTORGDLDNPQLSKEGDILLGGIFSFHSSWIN  
RENTYKQNPLPQCTSLNFRFQFAQTMLFAIEEINNSTELLPGITLGYKVYDTCGSIARSVKV  
ALNLAGSDTKTVMSKASCIPKPAQVQAIMGETSSSPSSAIATVIGPFSIPLISHFSTCACLSDK  
TKYPSFLRTIPSDYFQSRALAQLVKHFGWMWVGAIRTNDDYGNGMVTFTETAELGICLEY  
SVPFFRTDPPDKIQKIIDLKASTSKVIVAFVLSHMDMDVLKELSNHNISGYQWVGSESWIFDS  
QIAAVDQTHILDGAIGLSIPKAHVSGLKEFMLDVTPLNSSSNDLFVEFWFWEAMFSCEFQSKSA

VEIHGECTGREDVAGVKNSTDMSLMPIFNNAVYKGVYAVAHALHMILKCNETCDNGVQLOP  
LEILKYIQKIRFKTKEGDEVYFNENGDPAAKYEIINWQPRENGIVDFVKVGLYDASLSADKQLN  
LQDESLIWAKNSLEVPVSVCSSEKCPPGTRKVLQKGPVCCYDCIRCPDGEISNSTV  
LXXXXLLTAASLFGTCLTAIVAFIFRHRKTPLVRANSELSFLLLFSLILCFLCSLTFIGRPSEWT  
CQLRHTAFAITFVLCISCVLGKTIVVLMFAFKARLPGGNMMKWFGPTQQRLSVLGLTLIQVIICIL  
WLTISPPFPFKNVQEFRDKIILECALGSELGFWAGLGYIGLLAVLCFISAF LARKLPDNFNEAK  
FITFSMLIFCAVWITFIPAYVSSPGKFGVAVEIFAILASSFGLLICIFIPKCYVILLKPKDKNTKKYMM  
GKG

>MF\_8\_2\_FP

QVPVSVCSSEKQPGTRKVFQKGPVCCCHDCATCAEAGEISNNTDSITCVRCHPEFWSNERR  
DACVRKQEVFLSYEEIMGALLTAASLFGTCLTAIVAFIFRHRKTPLVRANSELSFLLLFSLILC  
FLCSLTFIGRPSEWTCQLRHTAFAITFVLCISCVLGKTIVVLMFAFKARLPGGNMMKWFGPAQ  
QRLSVLGLTLIQVIICILWLTISPPFPFKNVQEFRDKIILECALGSELGFWAGLGYIGLLAVLCFIS  
AFLARKLPDNFNEAKFITFSMLIFCAVWITFIPAYVSSPGKFSVAVEIFAILASSFGLLICIFIPKCY  
VILLKPEKNTRKYMMGKG

>MF\_3\_1\_F

MQRLTLLHLYGLCMSRVSGCDTFAHFNMPSLSKPGDIMIGGIFPIFNKEISNTVMFEREPLGT  
VCSGFDLRAFRWTQVMIFAIEEINKDPAFLPNVSLGYRILDSCASPTNALRTALTLAGGLOGM  
GSPCPPAISALIAESGSSQSVVAGALGPFQLPIISYFSTCACLSNRAKFPTFFRTIPSDYFOA  
KALAALVKHFGWKWIGAIQSDNDYGRNGMQAFTEEVOQIGVCVAFVGTVLRYSMSKILDV  
EMIKQSSVKVILAFVPEGDFYPLMKEVSRQNTGIQWIASEAWITAARPSTPEMFPAFGGTLG  
FVVQKMAIPDLQPFLRKINPYTDPNAAFVKDFWEAMFGCRPVSTGIYRDSSEINKICQGNETL  
MNSQDVFFKVTRELRSYNVYKAVYIAHALHELVCQSVDKRSARPCMNVSEIHPKEVTEYV  
KRVNFSNRFGDNVFFDEDEDGPPASYDIINWOLDNGKVQHVTVGQFISTQSGNYKLOIDEEKII  
WMTGQMVPKSVCSVDCPTGTWKASIRGKATCCFDCIPCADGTISNSTGAADCEPCPQEYW  
SNERKDECIPKKKEFLTYSEPMGIILTVLSLLGASLSLITMVVFIHFKETPVVKASNSELSCLLF  
SLFLCFICPLTFIGRPRTLWTCMLRHTAFGITFALCISCVLGKTTVVVTAFAKARHPGNKAARKFG  
PVQQRIIVCSCTVIQVVICILWLSLSPFPPEKVFYRYSNKKIILECNTGSEAAFVVLGYIGVLAVIC  
LVFAFLARKLPDNFNEAKCITFSMLIFCAVWITFIPAYVSSPGKFTVAVEIFAILSSTFGLLICIFAP  
KCYIILIKPEKNTKSHVLGPI

>MF\_13\_1\_F

MALLAANVLAFIGLFTGRFCTAGTLDSCVFLGEREELSLYEDGDVVIGGLFPLHFSPVSSPLTY  
KTKPPPNSYNYFSSRALRWMHTMSFAIKEINKRNDFLSNITLGFHIRDSCDDIPVSLKATLQL  
VNGQPESNLSTEGVTRNSSMEITNTLGCAAVNRRVSSVIIGDAGSGVSMALLRSLGSFHIPLV  
SYFASCSCLSNQKEFPTFMRTMPSDAFQIRALIQLVRYFGWTWVGWIGVESDYARFAIQLFLO

ESMHYGVCAAYTNFYVELNQHALDELDDVIQMKTSKVIVNFSGESEMODILREVQRRNITG  
LOWIASEAWATAKSLWEKSGKLLQGTGFAIQRAAVIPGLHQHLTSLSPLSIHKTAFLDEFWE  
ETFKCRLNDSINTHYHGEDTYHDRKMCKGTEKFDDVYSPYFDVTQLRVSYNVYKAVYLVAH  
SLQDMSDCKDGKGPFGQNGSCANPKNFKPWELLHYMKRTNFSVLGKEVNFQNGDPIAYY  
DLMNWQQMSDGSLSLVKVGFDASLPSG  
NLVINDSMIQWPVGKKNFALQALQSVCESECPPGFRVARRKGEPICCYDCIPCAEAGEISNAT  
DSLECSPCSEDTWPNAARDLCIPKSVEFLSYDALGILLCTTSVLGACMSFFVIVFFKYKDT  
PIVRANMELSFLLLVFLAICFLVGLLFIGEPSDWLCLIKFPAFGISFALCISCLLAKTSVVLMAF  
RARLPGSNVMKWFGPKQQRASVLLGTAVQVFVCLSWLLTAPPHANYNTNYHSSTIIIECVTG  
SEVGFWCVLGYIGFLACMCLLMAFLARKLPDNFNFAKFITFSMLIFFAVWITFIPVYMSTVGKF  
TVAVHVFAILASTLGLLLCIFAPKCYILLLRPDKNCKKKS

>MF\_2\_1\_F

MFALTPLSLFYSVNILTTLHFQCFSVTSPAPSTVRPCTLQNRFPQPAFTANGDYVIGGIFPLHYN  
QEMPDNLNCTYRPPPVRNCGFDPRAFRWALTMKLAVEEINQSTQLLPNYTLGYKIFDSCAYPL  
TGQRAAVAVLNGISEEESPTCSDASLLAVIGESGSAQSIVSRILQPFRIPMISYFSSCACFTD  
RRSYPTFFRVIPNDDYQVKAIAQLLVRFNWTWVGVRGDHEYGRFALQGLLRELKGTKVCVA  
YOEMIPLLYNRQKALEIMQVMKSSLAKVVVVFSAEGEMTPFLRDYMIQNITGIQWVASEAWV  
TASVFTGSEYYPFLGGTIGFGIRRGHISRLSDYLMTVSPENYPNNPLVKELWEALYGCSPHAP  
SASQLPLCTGQEIILLVQHSAYMNTSSPRVAYNVYKAVYAVAHSLHNLLLCKPGMGPFENNS  
CAQSNNVLPWQLQHYIEEVKFNIAGEEVNFDLKGDSVPYYDIINWQKGTSGNIEFVNVGLFD  
GTKAAGEELVIYEDKLTWAGHQREASC SHLSVCSASCPPGSRKAVRRGEPICCFDCIPCDS  
GKISNETNSVECFPCPEDFWSNEDRTICIPKKVEFLAYDSLGIALTVISVVGACTIGVFLVFFHH  
RNTAVVRVNNSELSFFILFALTFCFLCSLVFIGEPTRWSCMLRHTAFSITFSLCISCILAKTLVL  
AAFTATRPGDNIMKWLGPKHQRVIIFSCTMVQVIICAAWLIDASPYP SRNTKYERSKIILECSV  
GSSLAFWCVLGYIGLQACLCFVLAFLARKLPGNFNFAKFITFSILIFCAVWLA FIPAYISSPGIYA  
DAVESFAILASSFGLLFCLFAPKCYIILLKPEKNTKQHLMGKE

>MF\_14\_1\_YP

RETAETRQEVIFRVAGVGVDS DASQCVT LGD SHPVVLOSEGDVIVGGLFPLHYEASEPEHT  
YHSKPPTTPCTGFDQRAFRWLMTMVFAVEEINHSSVLLPGVTLGYRITDSCDNVHNSLRALF  
PLIRNVTTYSKEQEFRTTWSETNACL SGSPVSAVIGLASSSPTRAVAQALGPF SIPLVSYFATC  
TCLTDKRMYP SFLRTVPSDIFQVRGLVQLVTLFGWRWGTIGTDDYSQYGIQSFS AQFQKQ  
GGCVAFHLTIPKSPTLAEIQEMADRVORSAARVVVVFATEGQLLDLYFELVQRNVTHLOWVAS  
EAWVTAALLTLPHFHS LLEGTLGFSFPGVNIPSLENFLLNIHPSAEPGMEFINMFWEDQFGCK  
LHFEEDGSIK NVGDVNLRETPFCTGFENLSLTGSSYTDVSRVRISY NVYKAVY AIAHALHALLN  
CDSAEQNEKSCDKHKQFTSEQLLSHLKLVNFTNKFGEKVCFDSNGEPVPLYDIINWQKDKH

GKMRFVTVGSYDGSVPLGRQLQLNQSNIIWTEGHTEVPVSLCSEPCPPGNRQARRKGEPO  
CCFDCFP CADGEISNETGSAEICKPESYWSDEKKVKCVAGIEEFLSFKDSMGIILVALTLLGV  
VLTAVIIVIFHRFRTTPIVKANNSEISFLLLLSLKLCFLCSLVFIGQPSVWTCRIRQTAFGISFVCL  
SCLLVKTIVVLLAFQTKLPGSRALKLFGPSQQRIMIVFTTAPQVCLCAGWLLWAPPFPFRNSA  
YQASTRKVRP

>MF\_4\_6\_YP

TVVFFSFVQVLIFIIWLVLRPPFPMKNFSTYKERIILECALGSAIGFWAVLGYIGLLAVFCFVLA  
VLARLKDNDNFNEAKLITFSMLIFCAVWLNVAAYVSSPGKFTVAVEIFAILASSFGLIMCIFAPKCFII  
L

QPEKNTOKYLMNKK

>MF\_4\_1\_F

MEISAFFTILLPLCFLEMNSVFLLSGYLTGLKQRTEDDVANIDASSVKCKLRGTTRLPAFSMD  
GDFVIGGVFSIHYTMYTEIHIHATMPDPPKCIGSINARELRF SRTMIFAIEEINNSTELLPGIRLG  
YQIHDSCAAVPVAMQAAFQLSNSGDKVFKDSNCSQSGMMAAVVAESGSTPSISISRIIGPF  
NIPQVSHFATCACLSDKQQYPNFFRTVPSDAFQSVALAKLVKHFGWTWIGAICSDSDYGNN  
GMASFLQAAQKEGICVEFSESFHRTQPHKIQKVADFIRRSTAKVIVAFTSTGEMKVLLEELAA  
KPSPSRQWIGSESWITDTNLQKFTFCEGAIGFAIPKSDIPGLRDFLLDLSLSEVAASPVLTEFW  
EETFRCRLRKDVNTEQRVCNGSEDLOKVPNAFIPSSPLRITTMVYKAVYIAIAHAIHSVVCVKE  
NVT AQCDKHLMLLESKQVLDALKKVNLTQNGYPVSFDANGDPVAVYELVNWOKGESGNIELV  
TVGFYDASLPKYKEYYINKNLTWVDGIQQVGM SVCTDSCPPGTHKVLOK GKPICCYDCIPCP  
EGEISNTTDSDDCFPCPIEFWP NPEKDSCHPKPVEFLSIDETLTIILAVVSVGGACLSILTA AVFF  
HHRTTPIVRANSELSFLLLFSLTLCFLCSLTFIGAPTEWSCMLRHS AFGITFVLCISCVLGKTI  
VVLMAFKATLPGSNVIKWFGP LQQRLTVVFFTFVQVLICIVWLVL RPPFPMKNFSTYKERIILEC  
ALGSAIGFWAVLGYIGLLAVFCFVLA VLARLKDNDNFNEAKLITFSMLIFCAVWLSFIPAYVSSPG  
KFTVAVEIFAILASSFGLIMCIFAPKCFIILCQPEKNTKKYLMNKN

>MF\_4\_2\_F

MEISAFFTILLLSLCLFEMNSVFLLSGSLTGLKQRTGFDVANIDASSVKCKLRGTTS LPAFWM  
DGDFVIGGVFSIHYTMYTEIHIHATMPEPPKCIGSINARELRF SRTMIFAIEEINNSTELLPGIRL  
GYQIHDSCAAVPMAMQAAFQLSNGGGKVFYKDSNCSQSGMMAAVVAESGSTPSISISRIIG  
PFNIPQVSHFATCACLSDKQQYPNFFRTVPSDAFQSVALAKLVKHFGWTWIGAICSDSDYGN  
NGMASFLQAAHKEGICVEFSESFHRTQPHKIQKVDFIRRSTAKVVVAFAGFGEMKFLLEELA  
AKPTPSLQWVGSEAWITDTNLQRFTFCEGAIGFAIPKSVIPGLRDFLLDLSLSEVAASPVLTEF  
WEETFCKLRKDVNTEQRACNGSEDLOKVPNAFIPSSPLRITTMVYKAVYIAIAHAIHSVVCVK  
KNETAEDKRLMLLESKQVLKALKKVNFTQNGYHVSFEENGDPVAVYELVNWOKSERGVIELV  
TVGFYDASMPINRKFHF DKNLTWMDGRKQVSM SVCTDSCPPGTHKVLOK GKPSCCFDCIP

CPEGEISNTTDSDFPCPIEFWPNPEKDSCHPKPVEYLSIDETLAILLAHSVGGACLAILTAA  
VFFHHRTTPIVRANSELSFLLLFSLTLCFLCSLTFIGAPTEWSCMLRHSAGITFVLCISCVLG  
KTIVVLMFAKATLPGSNVMKWFGLLQQRLLTVVFLTFVQVLCIVWLVLRRPPFPMKNFITYKERII  
LECALGSAIGFWAVLGYIGLLAVFCFVLAVMARKLPDNFNEAKLITFSMLIFCAVWLSFIPAYVS  
SPGKFTVAVEIFAILASSFGLIMCIFAPKCFVILFQPEKNTKKYLMNKN

>MF\_4\_3\_FN

MEISAFNLVLPLCLFEMNSVFFLSGSLIGLKQRTGVDVASADASYVRCNPWGTRHSPAFS  
MDGDFVIGGVLSIHYNMYTEMNYATMPEPLKCTGSINARALRFSRTMMFAIEEINNSTELL  
GIRLGYQIHDSAAVAVVAAAFQLSNREDKIFYKDSNCSQSGMMAAVVAESGSTPSISISRII  
GSFNIPQVIVHIATCACLSDKQOYPNFFRTIPSDAFQSVLAKLVKHFGWTWIGAICSDSNYG  
NNGMASFLQAAHKEGICVEFSESFHRTOPHKIQKVADFIRRSTAKVIVAFTATGEMKVLLEELA  
AKPSPSRQWIGSESWITDTNLQKFTFCEGAIGFAIPKSDIPGLRDFLLDLSLSEVAASPVLEF  
WEETFKCRLLKDVNTEQRVCNGSEDLOKVPNAFIPSSPLRITTLVYKAVYIAIAHAIHSVVCVKK  
NETAECDKHLMLESKQVLDALKKVNFTKNGYPVSFDANGDPVAVYELVNWQKGESGKIELV  
TVGYYDASLPINKEFHINGNLTWMDGRKQVNMSVCTDSCPPGTHKVLQKKGKPCSCXXX\*PL  
ELTCALCVFLDSSDFPCPIEFWPNPEKDSCHPKPVEYLSIDETLAILAVSVGGACLAILTAA  
VFFHHRTTPIVRANSELSFLLLFSLTLCFLCSLTFIGAPTEWSCMLRHSAGITFVLCISCVLG  
KTIVVLMFAKATLPGSNVMKWFGLLQQRLLTVVFFTFVQVFCIVWLVLRRPPFPMKNFSTYKEKI  
ILECALGSAIGFWAVLGYIGLLAVFCFVLAVLARKLPDNFNEAKLITFSMLIFCAVWLSFIPAYVS  
SPGKFTVAVEIFAILASSFGLIMCIFAPKCFIILCQPEKNTKNYLMNKK

>MF\_4\_7\_YP

TFVLCISCVLGKTIVVLMFAKATLPGSNVMKWFGLLQQRLLTVVFFTFVQVLCIVWLVLRRPPFP  
MKNFSTYKEKIILECALGSAIGFWAVLGYISLLAVFCFVLAVLARKLPDNFNEAKLITFSMLIFC  
AVWLSFIPAYVSSPGKFTVAVEIFAILASSFGLIMCIFAPKCFIILCQPEKNTKNYLMNKK

>MF\_4\_8\_FP

GDVNTEQRVCNGSEDLOKVPNAFIPSSPLRITTLVYKAVYIAIAHAIHSVVCVKKNETAECDKH  
LMLESKQVLDALKKVNFTKNGYPVSFDANGDPVAVYELVNWQKGESGNIELVTVGFYDASLPI  
NKEFHIDRNLWMDGQQPVMSVCTDSCPPGTHKVLQKGPICCFDCIPCPEGEISNTSDS  
SDCFPCPIEFWPNPEKDSCHPKPVEYLSIDETLAILAVSVGGACLAILTAAVFFHHRTTPIVR  
ANSELSFLLLFSLTLCFLCSLTFIGAPTEWSCMLRHSAGITFVLCISCVLGKTIVVLMFAKAT  
LPGSNVMKWFGLLQQRLLTVVFFTFVQVLCIVWLVLRRPPFPMKNFSTYKEKIILECDLGS  
AIGFWAVLGYIGLLAVFCFVLAVLARKLPDNFNEAKLITFSMLIFCAVWLSFIPAYVSSPGKFTVAVEI  
FAILASSFGLIMCIFAPKCFIILCQPEKNTKKYLMNKN

>MF\_4\_4\_F

MATSPVFTILVGLSLFERNTVFLSESMNDPPVRCIPLATASSPAFSIDGDFIIGGVFSIYYTM

HTEIYNYTILPGPPWCTGSINSRELRFSRAMIFAIEEINNSRELLPGIKLGYQIHDKCAAVPVAM  
YAAFQLISGKNTVIFYKDKNCSQSGMVAAVIGGSGSTSSIGISRITGPFNIPOVSHFSSCACL  
DKQQYPNFFRTIPSDAFOAVALAKLVKHFGWTWIGAVCSDSDYGNGMASFLQAAQKEGIC  
VEFSEFYRTNPYNEIQRVADVIRRATAKVIVAFTASGEMKVLLEELARKPSPSRQWIGSESWI  
TDPNLLKFDCEGGIGFGIPKSVIPGLRDFLLDLSPSEVAASPLLTEFWENAFKCRLRKNVGA  
EERVCDGSEEDITKLOSPYTETSQLRVTNMVYKAVYAIHAHHSVVC PKKNLTTCKDKHLMLES  
KQVLDALKKVNFTKNGYPVSFDANGDPVAVYELVNWQKGESGNIELVTVGYYDASLPINKEF  
HINGNLTWMDGRKQVNMSVCTDSCPPGTHKVLOKKGK PICCYDCIPCPEGEISNTSDSSDCF  
PCPIEFWPNPEKDSCHPKPVEYLSIDETLAILA AVSVGGACLA ILTA AVFFHHRTTPIVRANNS  
ELSFLLLFSLTLCFLCSLTFIGAPTEWSCMLRHSAFGITFVLCISCVLGKTIVVLMFAFKATLPXX  
NVMKWFGLPQQRLTVVFFTFVQVLICMVWLVL RPPFPMKNFATYKERIILECALGSAIGFWAV  
LGYISLLAVFCFVLAVLARKLPDNFNEAKLITF SMLIFCAVWLSFIPAYVSSPGKFTVAVEIFAILA  
SSFGLIMCIFAPKCFIILCQPEKNTKKYLMNKN

>MF\_4\_5\_F

MEISAFCTLLLLLAVALLEINSVCVLCGLLTSFKQRAGLSESGVTISTDSSSVKCYLOGTAGSPV  
FSMEGDFVLGGVFSIHFNM DAKIHPYTAMPEPPRCTGGIDARELRFSRAMIFAIEEINNSTELL  
PGIRLGYQIHDSCGVVPVAMHKA FQLSNGGDSIFYTDNNCSQSGMMAAVVAESGSTPSISM  
SRIIGSFNIPOVSHYATCACLSDKQQYPNFFRTIPSDAFOAVALAKLVKHFGWTWIGAVCSDS  
DYGNGMASFLQAAQKEGICVEFSEFYRTNPYSKIQRVADVIRRATAKVIVAFTASGEMKVL  
LEELARKPSPSRQWIGSESWITDPNMMKFDCEGGIGFGIPKSVIPGLRDFLLDLSPSEVAAS  
PLLTEFWENAFKCRLRKDVGA EERVCDGSEDMTKLOSPYTETSQLRVTNMVYKAVYAIHAH  
HSVVCPEKNSTTKCDKHL MLESKQVLDALKKVNFTKNGYPVSFD TNGDPVAVYELVNWQK  
GESGNIELVTVGYYDASLPINKEFHINGNLTWMDGRKQVNMSVCTDSCPPGTHKVLOKGP  
SCCYDCIPCPEGEISNTSDSSDCFPCPIEFWPNPEKDSCHPKPVEFLSIDETLAILAVSVGG  
ACLA ILTA AVFFHHRTTPIVRANNS ELSFLLLFSLTLCFLCSLTFIGAPTEWSCMLRHSAFGITFV  
LCISCVLGKTIVVLMFAFKATLP GSNVIKWFGLPQQRLTVVFFTFVQVLICMVWLVL RPPFPMK  
NFSTYKEKIILECALGSAIGFWAVLGYIGLLAVFCFVLAVLARKLPDNFNEAKLITF SMLIFCAV  
WLSFIPAYVSSPGKFTVAVEIFAILASSFGLIMCIFAPKCFIILCQPEKNTKNYLMNKK

>MF\_16\_1\_F

MGTFLFPSFCAFVVCLSCCFSSDSSSIHSSCKLGRQFHLNALHMPGDVILGGLFEVHFTSVF  
PELIFTSEPTKISCQGFDP SGRHAMTMAFAIYEVNENPNLLPNLTLGYSLYDNCATLVIGFSA  
AMSLFNGQDEEFMPEENC SGRPPVLGIVGDSFSTFTIATSDVISLFR LPIVSYATCLCLSDRK  
RFPSFFRTIPSDAFOVHAMLQILKRF GWTWVGLLVSDDDYGHYVAQSFQSELHYSIGGCLAY  
LETLPWGDNPVELRRIVGLMKKSTARVVIVFAHQIHM IQLMEEVNVNQNVTGLQWMASEAWT  
SANVLQTPRFMPYLG GTLGIARRGEIPGLRDFLLRIRPHDKIDDENS MVKQFWEHTFQCRF



APPPVEWMEAGGALCSGEEDLQTVETTFLDVSNLRPEYNIYKAVYALVYALDQMLRCEPGR  
GPFSEHSCASLQOLEPWQLMHYLEKVNFTTSFGDEVSFDKNGDALPIYDVMNWWLPGG  
KTEVQNVGVVKKTPMKAELMINEDKIFWNFDTVKLDFVPRSVCSSESCPPGTRIVRRKGQP  
LCCFDCVPCSEGKITNQTDSIECLSCPEDFWSSKQNDHCVPKEIEFLSYDDPLGICLTASLL  
GTFICSIVFAIFIYHRSTPVVRANSELSYLILVSLKLCFLCSLLFIGQPQLWTCQLRHAVFGISF  
VLCVSCILVKTMMVLAVFRSSKPGGGSKLKWFGSVQQRGTVLALTCVQAVVCTVWIISASPTP  
HANTRYHNDKIIYECVVGSTAGFAVLLGYISLLAISFLLAFLARNLPDNFNEAKFITFSMLIFCA  
VWVAFVPAYVNSPGKYADAVEVFAILASSFGLLVALFGPKCYIILLKPEKNTRKAIMGRD

>MF\_16\_2\_F

MTIYLPTYFISTVYFITLYPEFSSLLTCNLRKNFTLNEIHKPGDVVLGGLFEVHYTSVLPERAFTS  
EPQOPLCKGFDTLGFRHAMTMAFAIDEINKKINLLPNVTLGYRIYDNCGALVVGFSGALS  
GTDEQFKLLENCSGTPPVLGIVGDHYSTFSIAIANVLGLYKMPLVSYFATCSCLSDRQRYPTF  
FRTIPSDAFQVRAMVKILKHFGWTWVGLLVSDDDYGLHVAQSFOSDLARSGDGCLAYLKVL  
PWNSDQSELTOIVHLIKASTARVVIVFAHEIHMIQLMEEVVRQNVGTGROWIASETWTTAVVLOV  
PHLMPYLSGTLGIAIRRGEIPGLRDFLSQIKPVKNSSGNDLVROQWEHTFKCKFDGAGSVET  
EKPLCTGMENIDAVQTEFLDLSNLRPEYNVYKAVYSLAYALHDMLKCQSESGPFSCATLSTL  
EPWQLAHYLOQVNFSTPFQDQVSFDKNGDALPIYDVMNWLWLPDGKTKVQNVGEVKSAG  
SGGEELYIDVDKIFWNTEKOPPOSVCSESCPPGTRVARRKGEPECCFSCVSCSEGKISNTT  
NSLECITCPEDFWSNSRRDLCVPPKTEFLSYHEPLGICLTTTSLGTFICTVLAIFAFHRRSPI  
VRANSELSFLLLVALKLCFLCSLLFIGQPRLWTCQLRHAVFGISFVLCISCILVKTMMVLA  
ASEPGGGGNLKWFGPKQQRGTVFSLTCIOAAICAAWLVS SSPAPRKNTQYHNDKIVYECEV  
GSTIGFAVILGYIGMLAILSFFLAFLARNLPNNFNEAKLITFSMLIFCAVWMAFVPAYINSPGRY  
ADAVEVFAILASSFGLLVPLFGPKCYIILLKPEKNTKKAIMGR

>MF\_15\_1\_F

MSWGYRLVTLWTSHAPSLLLVGLLGRQLGLQAGFQVVKTTNCSRWGTHSDNGLFEDGDIII  
GGLFSLRYTPPSVDYSFKQQPDNKPCTGVQNLPLQYIYAMLYALEEINRSLTLLPGVKLG  
YQIHDSCALPAWELKAVLSMVGNTFTCDTEAGNGMDIGQGDKPIPLIIGGSNSVTAQILSRV  
LGPLSVPVVSYFLLCPCLSDRQQYPNFFRTMASDAYQARAVAQLAIHFNWTWIGAVIADNDYGH  
MAVKVFQESIQENSVCLAFVETLORETIVSDAKRAALTIQASTAKVILIFTWYTDVIELFHQ  
LSKLNVTDRQFLASEAWSTSGDLLQDTASHKVARGLGVAIRSTALPGFDSYIRSLSPLLRPS  
DEFREFWQKEFGCDPNTNGPTQKASLPPCKGTETLEEYVQNFDTDSQLRVTYNVYLAVYAA  
AAHLHLLSCPERANSPGNVSSCSFPKEIKPFELMOHLSQVNFSTPQDELFYFKGGDITAKYD  
LVNWQSTPQGGRLRALIGRVDGFDLHLNDTAIEWSTGTSQVPVSVCSSESCAPGTRKASRK  
GEPICCFDCILCADGEISNQTGSLOCDHCPAEFWSNTERTVCVPRQLDFLSFNETLGVTLTAV  
AVSGATVTTAVFVFLHHRQTPVVRANSELSFLLLLSLKLCFLCSLLFIGRPSYWACRFQQA  
AFGI

SFVLCVSCLOVKTIVVLAAFRSARPGAEALMKWFGPGQQRGSVCFFTSIQVVICIIWLTLSPPI  
POPDLEIPGLKVTLKCAMASVVGFSVVLGYIGLLGCTSLLLAFLARKLPDNFNEAKLITFSMLI  
FCAVWVAFVPAYVSSPGKYAVAVEVFAILASSFGLLFCIFAPKCFIILLRPEKNTKKHLMAR

>MF\_16\_3\_YP

PSVCAFVCLSCCFSSDSSSIHSSCKLGRQFQLNALHMPGDVTLGGLFEVHFTSVFPELIFT  
SEPTKISCQGFDPFGFRHAMTMAFAIHEINKNPNULLPNLTLXNAAMSLFNGQDEEFMLQENC  
SGRPPVLGIVGDPFSTFTIAASDVISLFRLPVSYATCLCLSDRKRFPSPFFRTIPSDAFQVHAM  
LOILKHFSWTWVGLLFSDDDYGHHAQSFOSELHHSVGGCLAYLEMLPWGDNPVELKRIV  
GLMKKSTARVVIVFAHQIHMIIHLLLEEVNQNVTGLOWMASEAWTSANVFETPRFMPYLGGT  
LGIARRGEISGLRDFLLRIRPHDKIDDENSVMKQFWEHTFOCRFAPPPVEWMEAGGALCSG  
EEDLOTVETTFLDVSNLRPEYNIYKAVYALVYALDQMLRCEPGRGPFSEHSCASLOOLEPWO  
LMHYLEKVNFTTSFGDEVSFDKNGDALPIYDVMNWWWLPGKIEVQNVGFFKKTTLNDEELVI  
DEDKIFWNFDKVPKRVCSSESCPPGTRMVRKGOPLCCFDCVPCSEGKITNOTDSIECLSCP  
EDFWSSKQNDLCVPKKIEFLSYNDPLGICLTTASLLGTFCISIVFAIFIYHRSTPVVRANSELS  
FLILVSLKLCFLCSLLFIGQPQLWTCQLRHAVFGISFVLCVSCILVKTMMVLAFFSSSKPGGGS  
KWKWFGSVQQRGTVALTVCQAVVCTVWIISASPTPHANTRYHNDKIIYECVVGSTAGFAVLX  
XXQMRL

>MF\_16\_4\_YP

GTVALTVCQAVVCTVWIISASPTPHANTRYHNDKIIYECVVGSTAGFAVLLGYISLLAIISFLLA  
FLARNLPDNFNEAKFITFSMLIFCAVWVAFVPAYVNSPGKYADAVEVFAILASSFGLLVALFGP  
KCYIILLKPEKNTRKAIMGRD

>MF\_10\_5\_FP

DSADCSPCPLEYWSNEDHNKCVPKVIEFLSYEETMGTLTAFSLFGAGLTLVVSFVFFWFRH  
TPLVKASNSELSFLLLLSLTLCFLCSLTFIGRPTDWSCMLRHVAFGIAFALCISCILTCTITVVI  
KARTPVNTVPOCLASHQRMGVGGTFLOQLVLCVWLALAPPFPKNTMYAAERIILECNLG  
SSIGFWVVLGYIGLLAVLCLILAFARKLPDNFNEAKFITFSMLIFSAVWVTFIPAYVSSPGKFTV  
AVEIFAILASSFGLLFCIFAPKCYIILLKPERNTKNHMMGRD

>MF\_8\_3\_YP

STDSITCVRCHPEFWSNERRDACVRKQEVFLSYEEMGALLTAASLFGTCLTAIVAFIFRHRK  
TPLVRANSELSFLLLFSLILCFLCSLTFIGRPSEWTCQLRHTAFITFVLCISCVLGKTIVVMA  
FKARLPGGNMMKWFGPAOQRLSVLGLTLIQVIICILWLTISPPFPKKNVQEFRDKIILECALGS  
ELGFWAGLGYIGLLAVLCFISAFARKLPDNFNEAKFITFSMLIFCAVWITFIPAYVSSPG

>MF\_4\_9\_FP

PCPIEFWPNPEKDSCHPKPVEFLSIDETLTIILAVSVGGACLSILTAAVFFHHRTTPIVRANSE  
LSFLLLFSLTLCLCSLTFIGAPTEWSCMLRHSAFGITFVLCISCVLGKTIVVMAFKATLPGSN

VIKWFGLPQQRLTVVFFTFVQVLCIVWLVLRPPFPMKNFSTYKEKIILECALGSAIGFWAVLGY  
IGLLAVFCFVLAVLARKLPDNFNEAKLITFSMLIFCAVWLSFIPAYVSSPGKFTVAVEIFAILASSF  
GLIMCIFAPKCFIILCOPEKNTKK

>MF\_4\_10\_YP

KVPVSVCTDSCPPGTHKVLQKGKPSCCFDCIPCPEGEISNTTDSDDCFPCPIEFWPNPEKD  
SCHPKPVEYLSIDETLAILLAASVGGACLAAILTAAVFFHHRTTPIVRANSELSFLLLSLTLCL  
CSLTFIGAPTEWSCMLRHSAFGITFVLCISCVLGKTIVVLMFAFKATLPGSNVMKWFGPPQOR  
LTVVFLTFVQVLCIVWLVLRPPFPNENFITYK

>MF\_4\_11\_YP

GKPICCYDCIPCPEGEISNTSDSSDCFPCPIEFWPNPEKDSCHPKPVEYLSIDETLAILLAASV  
VGGACLAAILTAAVFFHHRTTPIVRANSELSFLLLSLTLCLCSLTFIGAPTEWSCMLRHSAF  
GITFVLCISCVLGKTIVVLMFAFKATLPGSNVMKWFGPLQQRLLTVVFFTFVQVLCMVWLVLRP  
PFPMKNFATYKERIILECALGS

>MF\_4\_12\_YP

SFLLLSLTLCLCSLTFIGAPTEWSCMLRHSAFGITFVLCISCVLGKTIVVLMFAFKATLPGSNV  
IKWFGPLQQRLLTVVFFTFVQVLCMVWLVLRPPFPMKNFSTYKEKIILECALGSAIGFWAVLGY  
IGLLAVFCFVLAVLARKLPDNFNEAKLITFSMLIFCAVWLSFIPAYVSSPGKFTVAVEIFAILASSF  
GLIMCIFAPKCFIILCOPEK

TKNYLMNKK

>MF\_16\_5\_YP

NSELSFLILVSLKLCFLCSLLFIGQPQLWTCQLRHAVFGISFVLCVSCILVKTMMVLAVFSSSK  
PGGGSKLKWFSGVQQRGTVALTCVQAVVCTVWIIASPTPHANTRYHNDKIIYECVVGSTA  
GFAVLLGYISLLAIISFLLAFLARNLPDNFNEAKFITFSMLIFCAVWVAFVPAYVNSPGKYADAVE  
VFAILASSFGLLVALFGPKCYIILLKPEK

>MF\_8\_4\_YP

PSEWTCQLRHTAFAITFVLCISCVLGKTIVVLMFAFKARLPGGNMMKWFGPAQORLSVLGLTLI  
QVIICILWLTISPPFPFKNVQEFRDKIILECALGSELGFWAGLGYIGLLAVLCFISAFARKLPDN  
FNEAKFITFSMLIFCAVWITFIPAYVSSPGKFSVAVEIFAILASSFGLLICIFIPKCYVILLKPEKNTR  
KYMMGKG

>MF\_10\_6\_YP

ASHQRMGVVGGTFLOVLVCVWLALAPPFPHKNTMYAAERIILECNLGSSIGFWVVLGYIGL  
LAVLCLILAFARKLPDNFNEAKFITFSMLIFSAVWVTFIPAYVSSPGKFTVAVEIFAILASSFGLL  
FCIFAPKCYIILLKPERNTKNHIMGRD

>MF\_4\_13\_YP

SCMLRHSAFGITFVLCISCVLGKTIVVLMFAFKATLPGSNVMKWFGPPQQRLLTVVFFTFVQVFI

CIVWLVLRPPFPMKNFSTYKEKIILECALGSAIGFWAVLGYIGLLAVFCFVLAVLARKLPDNFN  
EAKLITFSMLIFCAVWLSFIPAYVSSPGKFTVAVEIFAILASSFGLIMCIFAPKCFIILCOPEKNTK  
NYLMNKK

>MF\_4\_14\_YP

FKATLPGSNVIKWFGPLQORLTWFFTFVQVLICIVWLVLRPPFPMKNFSTYKERIILECALGSA  
IGFWAVLGYIGLLAVFCFVLAVLARKLPDNFNEAKLITFSMLIFCAVWLSFIPAYVSSPGKFTVA  
VEIFAILASSFGLIMCIFAPKCFIILCOPEKNTKKYLMNKN
