# Supplementary material for: Evolution and origin of vomeronasal-type odorant receptor gene repertoire in fishes
Source: PubMed Central journal article supplement (PMC1601972; doi:10.1186/1471-2148-6-76), 2006-10-03
Supplement: 1471-2148-6-76-S9.pdf [file 1471-2148-6-76-S9.pdf]

>Tr\_5\_24\_F

MVGFIINVHITLFFLILKIGRDTVASTSLPAATAPGDIIIIGGIFPIHEDVDKETESFEPHIRPCIRFO  
QSGFVLALAMINAIEDMNKSPPLADANITLGYRILDSCSDVSTALRATNDLMQQGNCNSSGS  
SSSCGQPIMAVVGASYSETSIAIARQLTLPMIPQISYSSSAVLLSDKTHFPAFMRTIPNDKYQT  
TAMITLLSHYGWNWVGIIITDGSYGLSALDOFVSQASAKGICVAFKSILPOSVSSQDTSSAIT  
KTARTIYKNPKVQVIISFAKPSQMKFLFHKLKSMMLKPGETNGEGRMRRVWVASDSWSTSR  
YIYGNLTLEDIGYVLGFTFKSGNVSSFREYLEQLGAPEENIKINPFLOEFYMHMNATAVGSGE  
DKHVPEALRSLWEHVHADLIFSVEMAVSAITQAVATICRRTDCKTLGQVQPWQVLAALWMQE  
FKLRQKSYKFDSSGDINMGYEIVMWTSTSEISVHHVVAEYHPLYSNITFMEQHNFTTKQLL  
DDLKVVSKCSNSCIPGQFKTSEGQHTCCYECINCTENYYSNSTDMDQCLSCDADTEWSP  
KGSSSCISKEQLFFSWNDIFAVVLLAFSALGILLCLLSALFLYQRDTPVKAAGGPLSQAILFS  
LVVSYISAMLFVGEPSLOCKARQVLFGISFTLCVSCILVKTQILLAFQFNPALQNMLRKIYQP  
YAIITICVALQTATCICWLVLVLLSPYAHIIKQPTLLQYCHEGSYVAFGVMLGYIAILAFVCFICAFK  
GRKLPEQYNEAKFITFSMMLYLISWLLFVPIYVTTSGVYLPVEMVILISNYGILSCHFFPKCYII  
FFKKEQNTSAFRKN

>Tr\_V2R2\_F

MDIGPFLAFCLFPLHVSADSTCKLKAKFNLSGYKNVEKKKVIGGMFPVHMRVSSSGGNT  
SRLPVSSGCEGFNLRTFRWTRTMLFAIDEINKREDLLPDTDLGYVIYDSCFTISKAVEGTLTYL  
TGQDEAVPNYRCGNPPLAALVGAGGSDLSIATARILGLYHFQVSYSSSTCSALKSKFQFPT  
FLRTIPNDQHQSTAMAKLVHFGWTWVGTISADDDYGYKYGKDFKEQVEEAGVCISFSETLPK  
VNSPENIQRIIQLVKSTAKIIVFSSDLDLPLITELLRHNITNRTWIASEAWVTSALMLKPGAS  
LLGGTLGFAVKRASIPGLQHYLLDLDPYGDTLSEEFWETVHRGLPDGLCTGLETVAQLKNT  
YSDVSQLRITYSVYKAVYAVAHALHNLEHCEQGRGPFNGRDCTNISSFEPWQLMYYLKNVR  
YTPHTGEEIYFDDGDVEGFYDIINWQFNSDGEISYVKVGHFNATAVPEEQMTIMNGSIVWNS  
DALEPPRSVCSDNCQPGTRKGIRQGEVCCFDCIPCADGEISNTTNARECILCGEDDWSNE  
AHDACVPKIIIEFLAFGEPLGITLIVISAFGALVTIAGVVVIVNVGTPLVEANDAVLSLSLLFSLVVT  
FLCSIVFLGEPQNWSCMTSQVALALGFALCLSCIMKGARRCGHINTGKCS  
ISQQQLLNFTS

CSFVLQAVACTVWLILLPPHAIKNTSAQNIKIILECDEGSIVFICCVFAYDILLALIAFIFAFMARKL  
EDHFSEGKCMTFGMLVFFIVWISFVPAYLSTRGKFMVAVQIFAILASSFGLLTCIFLPKCYILLIK  
PERNKEDMMRP

>Tr\_2\_1\_F

MTLLSDIILFYFFVVPVLSDPMSVSTSPSSSLCRLQNSFQPGFEANGDFIIGGMFPLHFNOE  
MPDLNNTYRPPPVKCNGFDPRAFRWAQTMKLAVEEINQRTDLLPDHVLGYKLFDSGYP  
GQRAALSLLNGPSTDGSSTCTGAAPLLAVIGESSSSLSVMLSRILOPFKIPVISYFSSCACLS

DKRKYPNFFRVIPNDDYQVKAIAQLLVHFNWTWVGLLLCERDYGRFAAEGLLRELKSTKVCV  
AYQEIIPLVYNQLRVQAIMQVMRTSSAKVVVVFSAEVEMIPLLRDYMKQINITGIOWIASEAWT  
ASVFTGSKYYPYLGGTIGLGIRKGHIPRLSDYLLTVNPQVYPNNPLVKELWETLYGCRSSLSS  
SSHVPLCTGQEPLEQHSAFMNTSSPRVTYNVYKAVYAIAHSLHNLFLCQPGPGPFKNNTC  
AQRNNVQPWQLOHSLOEVAFKISGEVVDQDQRGDSIPYYDIINWQRGVDGSIEFVNVGLFD  
GSKPTGKELVIQEDRIVWAGHQREASLSICSASCLPGTRKAIKKEVPVCCFDCIPC DTGKISN  
ETDSVDCTFCPEDFWPNPNRTVCIPKKVEYLAYDSLGIALMVT SVVGACATIATFAVFFYHRN  
TAIVRVNNAELSFILLSLVLCFLCSLVFIGEPTTWSCMLRHTAFSITFSLCFSCILGKTLVVLA AF  
TATRPGHNIMKWLGPQQRTIIFSCTLVQVVICTAWLIDAPPAPFRNTEYEHSKIILECSVGSSV  
GFWCVLGYIGLQACLSFILAF LARKLPGNFNEAKFITFSMLIFCAVWLA FIPAYVSSPGNYSDA  
VESFAILASSFGLLFCMFAPKCYIILLKPERNTKQHLMGKE

>Tr\_6\_1\_F

MARTTVLFIYCLLLMRTMSKTQTCTVTGQTGFMEFLKEGDLIIGGVFMSSTRVLVDNDYM  
AIPSAYCTRWNDRELKFARTAIFTVEEINRDGKLLPGVT LGYRLYNGCGSEN LIRAAVEAVTGE  
GCSSQVQALLGHSSSGVSEDINLILSPFSIPQVSHLSTCACLSDKKKYPTFFRTVPSDHFQIS  
GLVQLLKFFDWRWVGIVYATGSYSDDGTAHFVKEAEKEGICVEYRLCF SIASGEKSTAIVKAL  
QESSSRVLLFMSMFKTKAFLNEMENNNITDKQWLGSESWITQADLASSKROHILOGAIGF  
ALPQMVIPGLGDFLLSLKPSDEPQSDIVKAMWGDFFNCSFSPSSTSAACTGTEDLRTVTND  
YTEVTHFRAENNVYKAVYLVAYALQGLLQCENGSNPTTGKPCVNKKEVQPKLVLEHIKYVNF  
TTYKYGSKVFFDKNENSVAQYDLVNWQMREDGSVDIVTIGQYDTSFKGEELKVADDAKIVWG  
GKYKQVPRSVCREPCPPGTRKAINKLPVCCFDCFECPDGTF SNQTD SLDCFSCPQELWP  
NDQKNLCLPKPSEYLSYREITGALLSGFGCLGVFLSLLTTLIFLVHKETPIVKANSELSFLLLL  
SLKLCFLCSLTFIGRPSEWSCMLRHTAFGITFVLCISCVLGKTVVLM AFRATLPGSKVMKWF  
GPKQQRLTVLFTLIQVVICILWLTTNPPFPMRNMTYYKDKIILECALGSAVGF WAVLSYIGVLA  
ILCFILAF LARKLPDTFNEAKLITFSMLIFCAVWITFIPAYISSPGKFTVAVEIFAILASSFGLLLC IF  
FPKCYIIIFRPQKNCRKSLLGNP

>Tr\_8\_2\_F

MTSTQNWPEQGWALLQLLLLVSFSQAEDRVCLQMGPENPQLSKDGD IILGGIFS FHSSWI  
NRRDTYMHKPLPLOCISLNFRGFOYAQAMLFAIDEINNSSDLLPGITLGCKLYDSCRSIARGV  
RASLALINGGETTFKLSDECTKPAOVQAIMGETSSSPNMAVATVIGPFHVPLISHFATCACLS D  
KNKYPSFLRTIPSDHYQSRALAQLVKYFGWTWVGAVRSNDDYGNNGIATFIETAEELGICVEY  
SVAVFRTDPPKIQIIDIKASTSRVIVGFLSHLDIDVLILEMSQHNL TGYQWVGSEGWIIDSHT  
AAMDVRHILDGAVGLSIPKAHVTGMKEFILDVKQLNSSSKELFREFWEALFDCKFEDSASTTT  
ENQRECSGHEDLAGVKNTFTDMSLMPIFYN VYKEVYAVAHTLHDILSCNNTCNKTAQLDPFT  
ILQHIKKIRFKTKEGDEVYFNENGDPPAKYEIINWQPTENGNVEFVPVGLYDASLPADRQLTLT

NRTFVWTONSEQVPVSVCSSEKCPPGTRKVLQKGKPVCCYDCLRCAEGEISNSTDSISCVRC  
HSDFWSNERRDTCIKKKEEFLSYEEMMGALLTAASLLGTCLTAVVMFIFFRYRRTPIVRANNS  
ELSFLLLFSLTLCFLCSSLFIGRPSGWSCMLRHAAFGITFVLCISCVLGKTMVVLMAFRATLP  
GSNVMKWFGPAQQRSLVLFGLTQVFIQVCLLWLTISPPFPFKNIKDFKDRIILECALGSALGFWA  
VLGYIGLLAMFCFILAFILARKLPDNFNEAKFITFSMLIFCAVWVTFIPAYVSSPGKFSVAVEIFAIL  
SSGFGLLICIFIPKCYIILLKPDNRNNKKNIMGKA

>Tr\_6\_2\_F

MQLLRLLLLLAVLLGKGTPLCRLRDSAQVPELAODGDFVIGGIFSFRTGODYVIDTFQHIPEAR  
KCKNFNYREFKFAOTLIFAVEEINRNPDLLPHLKLGYKIYNTCGTMDILRAALALVSGLENEIS  
NENCTKIKTIQAILGHSGSRPTIAFAQVVGRFHIPVISHFATCACLSNRKEFPTFFRTIPSDFYQ  
SRALAKLVKHFGWWTWIGAIIVDNEYGLSGIATFIOAAQEHGVCTEYSESFSSSGPPETLQRIV  
EVRKATSKVIVAFMSHREIKLLAQELYSQITGLQWVGS DAWITDHSITDSSGHSILLGSLGF  
TVSKAKILGLEEHLRGLHPAQFPTSAFMTEFWEDRFACSLNITGSTGRRPCSGSESLQNDTS  
PFTDVTTELRTNNVYKSVYVVAHALDNLMKCEKGEKGFSEGCADPKHIQPVQVLHYINTV  
RFNTSEGETVYFERSGDSPARYELVNIQLTDKGTLEGRTVGIYDASLPEDHQFIMSDEPIVWG  
NGEMEAPVSVCTQRCLPGTHKVLQKGKPVCCFDCVPCPPGEISNSTNSIHCIKCPNLFWSN  
QERDACPXSIEFLAHKELLGTLVLFSLGVLFTTFMFLIFYCHKETPIVRANNSLSLFLFLSL  
TLCFLCSSLTFIGRPSGWSCMLRHTAFGITFVLCISCVLGKTMVVLMAFRATLPGSNMLKWFG  
PAQQRLCVVAFTFVQVLICILWLTISPPYPFENMDYYNDRIILECALGS AVGFVAVLGYIGLLA  
MFCFILAFILARKLPNNFNEAKFITFSMLIFCAVWVTFIPAYVSSPGKFLVAVEIFAILASSYGLLF  
CIFLPKCFIILFRPELNTKKHIIGKT

>Tr\_4\_2\_Y

SVIFLCFISLFDLNSAGDLKAPENSLKQQVGPREDTTGAAAPSDICRLQGSARLPAFSKDGDF  
VIGGVFSIHRYTVTVNHNYTTMPEPFRCRVIDHHELOQLSHAMVFAIEEINNSTELLPGIKLGYQI  
HDSAAVPIAVNVAFQLLNTLDPVFVTGDNCSQSGMVMMAVVGESGSTPSISISRVIGSFDIPLV  
SHFATCACLSDKQKYPFFRTIPSDQFOADALAKLIKHFGWWTWIGTVCSDSYGNNGMAAF  
LHAAQKEGICVEYSEFYRTHPHSRIKRVADVIRRS GATLSCCGIYHVGDLRILLE  
LSRGPSTPRQWIGSDXW

TDSMMLRFSFCAETIGFAIORSVIPGLRDFLLDLSPSKVASSRVLTEFWEDSFNCR LGKVAVA  
GERMCDGSEDIMTLQSPYTDSELRITNMVYKAVYAIHAHNAVCQDTNATTRCGKFTTINP  
KQVLAQLKTVNFSQNGYAVSFDANGDPVASYELINWKKSGSGSIEVVPVGYDASLPEGQE  
FRIFRDITWVDGRKQVPVSVCS DSC PQGTRKVLQKGK PICCYDCVQCPEGEISNVTDSPECI  
PCLDDFWPNPERNACFPKPVEFLSFNEVLGII LAVFSVGGACLAVITA AVFFHHRTSPIVRANN  
SELSFLLLFSLTLCFLCSSLTFIGAPSHLSCMLRHTAFGITFVLCI  
CILGKICGGVN

>Tr\_14\_1\_F

QHIAKEKNDTHGLEAGDGDNDASPSLPRCVKTVDTQRPALHSRGDVMIGGIFPLHYSASVSQ  
QKYINKPELITCSGFDHRAFRWMMTMVFAVNEINNNSSLLPGVKLG YRILDGCDHVPTSLOA  
LLSLVKESMTWKQVEEMIPACLADSPVAAVIGLASSSPTGAAAHILGSFNIPLVSYFATCTCLS  
DKSTYPSFLRTVPSDLFQVRGLVQMVTFMSWLWVG TIGTTDDYSHYGIQAFSHQLRQGG  
CVEFOLTIPKSPTAAELKEMADRLOSSTARVVVVFATEGOLLE  
FSWRNMTGIQWVASEAWWTASLLTTPRFHALLEGTLGFSFPGA EIPGLKEFLLNICPSPKPG  
MEFVNMFWEDLFGCKLNSDTKSADESPVCTGSEDLRYTQSSYTDVSQVRISYNVYKAVYAI  
AHALHLLNCESPGSNVGTCKKREPFTSKOLLOHLKSVNFTNQFKEKVYFDAKGEPVPLYDI  
INWQKDSVSNIRFVKVGSYDGSAPLKQQLQMDQNAIWWTG GSKVPVSLCAAPCPPGSRO  
ARRPGOPHCCFDCLPCADGQISNOTGSTEQRCEYYWPKDKVKCLPGIEEFLSFSETM  
GIILVILTLVGVLLTFSLTIIIFLHFRSTPIVKANNSEISF LLLLSLKLCFLCSLLFIGOPSLWKCR LRO  
AAFGISFVLCLSCLLVKTIVVLFARFTNL RAGCCALKLFGPSRQRTLILCTTAPQVCLCAGWLL  
AAPSFPVRNPAYQALTGKIVLECKEPWPPGFYLV LGYIGLLAFLCLLLAFVGRKLPNTFNEAKL  
ITFSLIFWAVWISFIPAYVSSPGKFTVAVEVFAILASSFGL LLLCIFLPKCFIILLRPERNVKKGMT  
GKC

>Tr\_4\_3\_FP

GTRKVLQKGKPICCYDCVQCPEGEISNVTDSSDCEPCSEEF WPNPERNACFLKPVEFLSFN  
EVLGIILAVFSVGGACLA VITA AAVFFHHRASPIVRANSELSF LLLFSLTLCFLCSLTFIGAPSOL  
SCMLRHTAFGITFVLCISCILGKT VVWLMAFRATLPGSNVMK WFGPPQQRMTVVTFTSIQVLI  
CIVWLVSPPFPVRNL TTYKERIILECALGSSVGFWAVLGYIGLLAAVCLVLAVLARKLPDNFNE  
AKMITFSMLIFCAVWITFIPAYVSSPGKFTVAVEIFAILASSFGLILC IFAPKCFIILFKPEKNSKKH  
LMNKK

>Tr\_4\_4\_FP

HDCCA AVPIAVHVA FQLLNTLDPVFVTGDNCSQSGMVM AVVAESGSTPSISISRVIGSF DIPLV  
SHFATCACLSDKQKYP SFFRTIPSDQFOADALAKLIKHFGW TWIGTVCSDSYGNNGMAAF  
LHAAQKEGICVEYSESYRTHPHSR IKR VADVIRRSTAIIVVAFTSSGDLRILLEELSREPSPPR  
QWIGSESWVTDSEILRFSFCAGTIGFAIQRSVIPGLRDFLLDLSPSKVASSPVLTEFWEDSFNC  
RLGKVAVAGERMCDGSE DIMTLQSPYTDSELRITNMVYKAVY AIAHAIHNAVCQDTNATTR  
CSKFTTINPKKVLAQLKTVNFSQNGYAVSFDANGDPVASYELVNWKKSGSGSIEVVPVGYD  
ASLPEGQEFRIFRDITWVDGRKQVPVSVCS DSCPOGTRKVLQKGK PICCYDCVQCPEGEIS  
NVTDSPECIPCLDDFWPNPERNACFLKPVEFLSFNEVLGIILAVFSVGGACLA VITA AAVFFHHR  
TSPIVRANSELSF LLLFSLTLCFLCSLTFIGAPSHLSCMLRHTAFGITFVLCISCVLGKT VVWL  
MAFRATLPGSNVMK WFGPPQQRMTVVTFTSIQVLI CIVWLVSPPFPVRNL TTYKERIILECAL  
GSSVGFWAVLGYIGLLAAVCLVLAVLARKLPDNFNEAKMITFSMLIFCAVWITFIPAYVSSPGK

FTVAVEIFAILASSFGLILCIFAPKCFIILFKPEKNSKKHLMNKK

>Tr\_16\_4\_FP

VCCFDCLP

SEGEISNTTDSMECTSCPEDFWSSPQRDHCVPKTEFLSYHEPLGICLTAASLLGTVISAVVL  
GIFIIHRSTPVVRANSELSFLLLVSLLKLCFLCSLLFIGRPRLWTCQLRHAAFGISFVLCVSCIL  
VKTMVVLAVFRASKPGGGTTLKWFGAVQQRGTVLGLTSVQAAICTAWLVSYSPEPHKNTQY  
YNYKIVYECVVGSPIGFSVLMGYIGLLAVLSFQLAFLARNLPDNFNEAKLITFSMLIFCAVWVA  
FVPAYINSPGKYADAVEVFAILASSFGLLVALFGPKCYIILLRPERNTKKAIMDRD

>Tr\_16\_5\_FP

MGTILDLLLLLYFCIHLTFFLSFLFAEAFADLPYCRLRROFDLNGMHKPGDMILGGLFEVHYTS  
VFPDLTFTSEPNQLVCOGFDLAGFRHAMTMAFAIDEINRNISLLPNVTLGYSLYDNCATLVIGF  
SAALSMVSGQQEQFLOQEKCLGTPPVLGIVGDSFSTFSIATSDVIGLFLKLPVSYFATCSCLSD  
RQRFPSFFRTIPSDAFQVRAVIQILKHFRWSWVGLLVSDDDYGLHVARSFQSDLTRSGGGCL  
AYLEILPWGYNPGELTQVVEVMKKSTARVVIVFAHQIHMQLMEEVVKQNLTLGLOWIASEAWT  
AAAVLOTTELMPYLGGLTGLAIIRGEIPGLRDFLLGLHPDLHEISNRNSLVRQFWEYTFQCRF  
APAPTGWVEGGGLLCTGEEELGRVQTEFLDVSNLRPEYNIYKAVYALAHALDEMLHCVPGR  
GPFDEHRCATLESLLKPWQLMHYLOQVNFTTAFGDEVSFDENGDALPIYDIMNWLWLPDGRT  
XPQRDHCVPKTEFLSYHEPLGICLTAASLLGTVISAVVLGIFIIHRSTPVVRANSELSFLLL  
SLKLCFLCSLLFIGRPRLWTCQLRHAAFGISFVLCVSCILVKTMVVLAVFRASKPGGGDILKW  
FGAVQQRGTVLGLTSVQAAICTAWLVSYSPEPHKNTQYNYKIVYECVVGSPIGFSVLMGYIG  
LLAVLSFQLAFLARNLPDNFNEAKLITFSMLIFCAVWVAFVPAYINSPGKYADAVEVFAILASSF  
GLLVALFGPKCYIILLRPERNTKKAIMDRD

>Tr\_16\_1\_F

MWTASQVSLCSFLCCLSLDSHFYFLECSPLHSCRMQEQFNLSGMHRAGDVVLGGLFEIHFF  
SVFPDLSFSSKPOOPTCHGFDVLGFRQAQTMAFAIDEVNRNPHLLPNVTLGYSIYDNCVKLA  
IGFRAALSLISGEEERFELTDTCKGSPVIGVGDSSSTRSIAISTVLGLYRVPVMSYFATCSCLS  
DRQMFPSFFRTIPSDAFQVSAMIQILKHFSWTWAGLLVSDDDYGLHAARSFQSDLAESGGG  
CLAYVEVLPWGEDRPELRRIVDVMKASTALVVIVFAHETHMINLMEEVRRQNVTGLOWIASEA  
WTAASVLOTPELMPFLAGTLGAIIRGEISGLREFLOGIHPEERSNNHYGNSLVKQFWEHTF  
QCKFAPPAGQVDTGGRPCTGREHLEDAETEFMDLSNLRPEYNVYKAVYALAYAIIDMLKC  
EPGREPFGGKRCGSLKQLEPWQIVYYLEKVNFTTTPFGDQVSFDENGDALPIYDIMNWLWLP  
DGRAKVONIGEVRSPSRDEELTIHEDKIFWNFESKKPPHSVCSESCPPGTRMSRKKGQPV  
CCFDCLPCSEGEISNTTDSMECTSCPEDFWSSPQRDHCVPKTEFLSYHEPLGICLTAASLL  
GTVISAVVLGIFIIHRSTPVVRANSELSYQILVSLKLCFLCSLLFIGRPRLWTCQLRHAAFGIS  
FVLCVSCILVKTMVVLAVFRASKPGGGATLKWFGAVQQRMTVIILTSIQAAICLSWILLASPPF

HKNTQYSNERIIECAVGSTVGFILLLSYIGLLATLSFLIAFYSRKLPDSFNEAKLITFSMLIFCAV  
WVAFVPAYISSPGKYADAVEVFAILASSFGLLAALFGPKCYIVLLRPEKNTKNAIMGRV

>Tr\_16\_2\_F

SRVFILCRLILLFSSSSSLYSTSPSCKLWRRFSLNEMHKPGDVVLGGLFEVHYTSVFPELTFTT  
EPQOPVCRGFDILGFRHAMTMAFAVEEINRNSNLLPNLTLGYSLFDNCGALVVGFSGALS  
SSPEMQFLLEEDCEGPPPVGIVGDHYSTFSIAISSVLGLYKMPIVSYFSTCSCLSDHQRFPS  
FFRTIPSDAFQVRAMIQILKHFGWTWVGLLVSDDDYGLHVARSFQSDLVQSGQGCLAYLEVL  
PWDGDPSEIRRIVHVIKESTARVLMVFAHEIHMIOQLMDEVVQONVTGROWVASEALTAAVLO  
VPHFMPYLRGMLGIAIRRGEIPGLREFLRQVRPDRHSRDTETSMFWEYIFOCKFDPPGLVEA  
GEVLCTGQEAIEDADTEFLDLSNLRPEYNVYKAVYALAYALDDALRCEPGRGPFSAHSCAEN  
QRLOPWQLVYSLEKVNFTTSFGDQVSFDENGDLPIYDIMNWLWLPDGRTKVQNVGEVKG  
SPFRGEELTYEDKIFWNFESNKPPQSVCSSESCPPGTRMSRKKGQPCCFDCLPCSEGEIS  
NTTDSMECTSCPEDFWSSPQRDHCVPKKTEFLSYHEPLGICLTAASLLGTVISAVVLGIFIHH  
RSTPVVRANSELSFLLLVSCLKCFLCSLLFIGRPRLWTCQLRHAAFGISFVLCVSCILVKT  
MVLAVFRASKPGGGAILKWFGAVQQRGTVLVLTVCVQAAICVAVIVSATPEPQKNTQYHNDRIVY  
ECAMGSTIGFSALLGYIGLLAILSFLLAFLARNLPDNFNEAKLITFSMLIFSAVWVAFVPAYINSP  
GKYADAVEVFAILASSFGLLVALFGPKCYIILFKPNKNTKKAISR

>Tr\_16\_7\_FP

TEFLS

HEPLGICLTAASLLGTVISVVVLGIFIHHRSTPVVRANSELSFLLLVSCLKCFLCSLLFIGRPRL  
WTCQLRHAAFGISFVLCVSCILVKTMMVLAVFRASKPGGGATLKWFGAVQQRGTVLGLTSIQ  
AAICFAWLLSSSPKPHKNIQYHKDKIVFECVVGSTVGFVLLSYIGLLAILSFLLAFLARNLPDN  
FNEAKLITFSMLIFCAVWVAFVPAYINSPGKYADAVEVFAILTSSFGLLVALFGPKCYIILFRPER  
NTKRAIMAR

>Tr\_15\_1\_F

MSQLSRIFTLIVGFGGRELGLGGVLQVQALTCQWSTPTEQGLFQDGHVVVGGFLNLHYT  
PPDTANNFTQOSHAKACTGLENLPLQYIYAMVFAVEEINHSAALLPGVKLGYHIRDSCALHP  
WTTQALALVAGDSASCELATPADYSAETSEEKGAASVPLIIGGASSNAKILLGTLSPLSVPL  
ISYTASCPCLSDRHRYPTFFRTMASDIYQAQALAQLVLRFNWTVIGAVVANNDYGHVAVKVF  
QEQTQGGKGVCLAFVETLQRETIVADAVRAARTIQASTARVILVFSWYTDVGHILFRQLOKINVT  
DRQFLASEAWSTSEVLLKDPDTSTVASGVVGVAIASQHIPGDFRFLRGLNPSLRPSDKFLQE  
FWEEEFGCSPSPSSETSGDLNASLPPCSGAESLEGVQHPFTDTSHLRVTYNVYLAVYAAA  
NALHSLSCPIHNSPSGTSHCTSPKGIKTTELLQHLSKVNFTTPQGKHLYFRGADIPAMYDLI  
NWQSGTDGTLQLVLIGAVAGFDLQLNESEIEWSAKYNQVPVSVCSSESCPPGTRKANRKGE  
LCCFDCIPCADGEISNTSGSLQCDRCPEFWSNDGRTACVPROLDLFSFNETLGVALTAVAV

SGAVVTTAVFVFLHYRHTPMVRANSELSFLLLLSLKLCFLCSLVFIGRPSVWSCRFOQAAF  
GISFVLCVSCLOVKTIVVLAAFRSARPGAGALMKWFGPSQQRGSVCIFTCVQARVIICIVWLS  
LSPVPQADLDVPGLOVTLECAMASVVGFSVLVGYIGLLACTCLLLAFLARKLPDNFNEAKLI  
TFSMILFCVWVAFVPAYISSPGKYSVAVEIFAILASSYGLLFCIFAPKCFIILLRPEKNTKKHLM  
MR

>Tr\_8\_7\_FP

DSISCVRCHSEFWSNERRDACIKKKEEFLSYEEMMGALLTVASLLGTCLTAVVMFIFFRYRRT  
PIVRANSELSFLLLFSLTLCFLCSLTFIGRPSGWSCMLRHTAFGITFVLCISCVLGKTMVVL  
AFRATLPGSNVMKWFGPAQQRSLVLTGFTLIQVFICLLWLTISPPFPFKNIKDFKDRILECALGS  
AVGFWAVLGYIGLLAMLCCFLAFLARKLPDNFNEAKFITFSMLIFCAVWTFIPAYVSSPGKFS  
VAVEIFAILSSGFLLICIFIPKCYIILLKPERNTRKRNLMGKE

>Tr\_4\_5\_FP

GDNCSQSGMVMMAVVGESSTPSISISCVIGSFDVPLVSHFATCACLSKQKYPSSFFRMIPSD  
QFQADALAKLIKHFGWTWIGAVCSDSYGNNGMAAFLYPSFTPGKRLELLISFTANTMVIIQ  
RKALLQVSEGGVEELDDGIVHPDARLVGELQQVHEGAYQWAQVGEDESQRLHQMRRQS  
YRPVAVELLGVRFCFRHWDDAGRLPQLWHSPQPOVQVEHVTEPTQLVCAGLOEPGADAVQ  
TCRFPGPVLLQGLPHLLKTVNFSQNGYAVSFDANGDPVASYELVNWKKSGSGSIEVVPVGY  
YDASLPEGQEFRIFRDITWVDGRKQVPVSVCSDSQPQGRKVLQKGPICCYDCVOCPEGE  
ISNVTDSPECIPCLDDFWPNPERNACFLKPVEFLSFNEVLGIIAVFSVGGACLAVITAAVFFHH  
RASPIVRANSELSFLLLFSLTLCFLCSLTFIGAPSQVSCMLRHTAFGITFVLCISCVLGKTVV  
LMAFRATLPGSNVMKWFGPPQQRMTVVTFTSIQVLCIVWLVSPFPVVRNLTTYKERIILECA  
LGSSVGFVAVLGYIGLLAAVCLVLAVLARKLPDNFNEAKMITFSMLIFCAVWTFIPAYVSSPG  
KFTVAVEIFAILASSFGLILCIFAPKCFIILFKPEKNSKKHLMNKK

>Tr\_15\_4\_FP

SLLLLCVMGARAGLDVAGAMLCSHWGQRSDRNLSDAGDVMIGGLFNLYYIPSAVQQEYTO  
LPHYERCSSLDIESLKYMYTMVFAVEEINRDDSELLPGVRLGYGIRDSCFRYPWALDGA  
SLVTGDSNSCNVAASSTRSAGGNTGAVEVPLIIGAASSTTGIMLSSILQSLSVPIISYSASCPCLSD  
RAKFPTFFRTIPSDIYQARAMAQLAIRFRWTWLGAVVNNNDYGQLAIQIFQEEIRGKEMCMEF  
IETVNRETLTTDARRIALTIQAATARVILFCWYIDAKEILLELAKRNITGROFLASEALSTSEELLO  
ELAIAEVANGVLGVAIQSSTIPGFEHFLRSLNPVQRPDDEFKDFWEMEFKCSPLQLLHSC  
LVFLFYKGLTMKGVLFPSKGSFFKASLPPCSGAESLVEMDYPFPHTSKLRVAHNVYLAVYAA  
AHALHSLSCPGQDSPPGKSNCSPPNHIRPID

QIFRTSLRWXSGAVVTTAVFVFLHYRHTPMVRANSELSFLLLLSLKLCFLCSLVFIGRPSV  
WSCRFOQAAFGISFVLCVSCILVKTIVVLAFRSAQPDCKATMKWFGPSQQRGSVGLFTSIQI  
VICGTWLSVSPPKPERDLGFQGSKVTLECTMASVVGFSVLVGYIGLLACTCLLLAFLARKLPD

NFNEAKLITFSMLIFCAVWVAFVPAYVSSPGKYVWAVEIFAILASSYGLLFCIFAPKCFIILLRPEK  
NTKKHLMSRN

>Tr\_15\_3\_YP

MSQLSRIFTLIVGFGGRELGLGGVLQVVOALTCSQWSTPTEOGLFQDGHVWVGGLFNLHYT  
PPDTANNFTQOSHAKACTGLENLPLOYIYAMVFAVEEINHSAALLPGVKLGYHIRDSCALHP  
WTTQAALALVAGDSASCELATPADYSAETSEEKGAASVPLIIGGASSNAKILLGTLSPLSVPL  
ISYTASCPCLSDRHRYPTFFRTMASDIYQAQALAQLVLRFNWWTWIGAVVANNDYGHVAVKVF  
QEQTQGGKGVCLAFVETLQRETIVADAVRAARTIQASTARVILVFSWYTDVGHFLFRQLOKINVT  
DRQFLASEAWSTSEVLLKDPDTSTVASGVVGVAIASQHIPGFDRFLRGLNPSLRPSDKFLOE  
FWEEEFGCSPSPSSETSGDLNASLPPCSGAESLEGVQHPFTDTSHLRVTYNVYLAVYAAA  
NALHSLLSCPHNSPSGTSHCTSPKGIKTTELLQHLKVNFTTPOGXHLYFRGADIPAMYDLI  
NWQSGTDGTLQVLIGAVAGFDLQNESEIEWSAKYNOQVPVSVCSSESCPPGTRKANRKGE  
LCCFDCIPCADGEISNTSGSLQCDRCPPEFWSNDGRTACVPRQLDFLSFNETLGVALTAVAV  
SGAVVTTAVFVFLHYRHTPMVRANSELSFLLLLSLKLCFLCSLVFIGRPSVWSCRFOQAAF  
GISFVLCVS

>Tr\_15\_2\_F

MSWLLALLVQRPRSPASLLLLCVMGARAGLDVAGAMLC SHWGQRSDRNLSADGDVMIGG  
LFNLYYIPSAVQQEYTQLPHYERCSSLDIESLKYMYTMVFAVEEINRDDSLLPGVRLGYGIRD  
SCFRYPWALDGALS LVTGDSNSCNVAASAGGNTGAVEVVPLIIGAASSTTGIMLSSILOLSV  
PIISYLASCPCLSDRAKFPTFFRTIPSDIYQARAMAQLAIRFRWTWL GAVVNNNDYGQLAIQIF  
QEEIRGKEMCMEFIETVNRETLTTDARRIALTIQAATARVILIFCWYIDAKEILLELAKRNITGRQF  
LASEALSTSEELLQELAI AEVANGVLGVAVQSSTIPGFEHFLRSLNPVQRPDDEF LKDFWEME  
FKCSPVLQLLHSCLFVFLFYKGLTMKGVLFPSKSTRKASLPPCSGAESLVEHEHPFTDTSK  
LRVAHNVYLAVYAAA HALHSLLSCPGQDSPPGKSNCS SPNHIRPIDVLQHLNRVNFSTPRGE  
TFYFQGS DM TARYDLVNWQKTPNGPLKLVLVGRVDGFDLILNESAIQWSTGLNQVPVSVCS  
SCPPGTRKANRKGEPLCCFDCIPCADGEISNTSGSLQCDRCPPEFWSNDGRTACVPRQLD  
FLSFNETLGVALTAVAVSGAVVTTAVFVFLHYRHTPMVRANSELSFLLLLSLKLCFLCSLVI  
GRPSVWSCRFOQAAF GISFVLCVSCILVKTLLVLA VFRSAQPDCKATMKWFGPSOQRGSVG  
LFTSIQIVICGIWLSVSPKPERDLGFQGSKVTLECAMASVVGFSVLVGYIGLLACTCLLLAFLA  
RKLPDNFNFAKLITFSMLIFCAVWVAFVPAYVSSPGKYVWAVEIFAILASSYGLLFCIFAPKCFIIL  
LRPEKNTKKHLMSRN

>Tr\_4\_1\_F

MEISVFLFCFISLFDLNSAGDLKAPENSLKQQLGPREDTTGATAPSVKCRLOGSARLPAFSKD  
GDFVIGGVFSIHRYTVTVNHNYTTMPEPFRCRVINHRELRLSHAMVFAIEEINNSTELLPGIKL  
GYQIHDSCAAVPIAVHVAFQLLNTLDPVFTGDNCSQSGMVMMAVVGESGSTPSISISRVIGSF



DFPLVSHFATCACLSDKQKYPSFFRTIPSDQFQADALAKLIKHFGWTWIGTVCSDSYDYGNG  
MAAFLHAAQKEGICVEYSESYRSHPHSRIKRVADVIRRSTAIIVVAFSSGDLRILLEELSREP  
SPPRQWIGSESWVTDLDRFSFCAGTIGFAIQRSVIPGLRDFLLDLSPSKVASSPVLTEFWE  
DSFNCRLGKVAVAGERMCDGSEDIMTLQSPYTDSELRITNMVYKAVYAIAHAIHNAVCQDT  
NATTRCSKFTTINPKKVLTLQKTVNFSQNGYAVSFDANGDPVASYELINWKKSGSGSIEVVPV  
GYDASLPEGQEFRIFRDITWVDGRKQVPVSVCSDSQPQGRKVLQKGPICCYDCVQCPE  
GEISNVTDSPECIPCLDDFWPNPERNACFLKPVEFLSFNEVLGILAVFSVGGACLAVITAAVFF  
HHRASPIVRANSELSFLLLFSLTLCFLCSLTFIGAPSHLSCMLRHTAFGITFVLCISCILGKTVV  
VLMAFRATLPGSNVMKWFGPPQQRMTVVTFTSIQVLICIVWLVSPPFPVRNLTTYKERIILEC  
ALGSSVGFVAVLGYIGLLAAVCLVLAFLARKLPDNFNEAKMITFSMLIFCAVWITFIPAYVSSP  
GKFTVAVEIFAILASSFGLILCIFAPKCFIILFKPEKNSKKHLMNKK

>Tr\_16\_3\_YP

VRFDILGFROAMTMAFAVQEIKNPDLNLTLYHLYDNCGALVVGFSGALALASGOEEAF  
ALOGGCAGSPPVLGIVGDSPTFTIASASVLGLYKIPMVSYFATCSCLTNRQRFPSFFRTIPSD  
AFQVCAMIQILKHFGWTWVGLLVSDDDYGLHVARSFQSDLAQSGOGCLAYLEVLPWDGDL  
SENRRIVHVIKESTARVLMVFAHESHMINLMEEVVRQKVTGLOWLASEAWTGTTLLQTPDFM  
PYLNGTLGIAIRGEITGLRDFLLRIRPGOSSNNTSYNMVQQFWEYSFOCKFGASGSAEACT  
GDENIQQVDAEFLDMSNLRPEYNIYKAVYALAHALDDMLQCEPGRGPFSGGSCADIHKLEP  
WQFVHYLQHVNFSTTTFGDQVSFDENGDLPIYDIVNWQWLPNGRTEVQNVGEVKRSPSRG  
EELQIHEDKIFWNFESNKPPQSVCSSESCPPGTRMSRKKGQPVCCFDCLPCSEGEISNTTDS  
MECTSCPEDFWSSPQRDHCVPKTEFLSYHEPLGICLTAASLLGTVISAVVLGIFIHHRSTPVV  
RANSELSFLLLVSLKLCFLCSLLFIGRPRWLTCQLRHAAFGISFVLCVSCILVKTMMVLAVFR  
ASKPGGGAT

>Tr\_16\_8\_FP

XSGTGDENIQQVDAEFLDVSNLRPEYNIYKAVYALAYALDDMLQCEPGRGPFSGGSCADIHK  
LEPWQFVHYLQHVNFSTTTFGDQVSFDENGDLPIYDILNWQWLPDGRTOVQNVGEVKRSP  
SRGEELQIHEDKIFWNFESNKPPHSVCSESCPPGTRMSRKKGQPVCCFDCLLCSEGEISNT  
TDSMECTSCPEDFWSSPQRDHCVPKTEFLSYHEPLGICLTAASLLGTVISAVVLGIFIHHRST  
PVVRANSELSFLLLVSLKLCFLCSLLFIGRPRWLTCQLRHAAFGISFVLCVSCILVKTMMVLA  
VFRASKPGGGAILKWFGAVQQRGTVLGLTSIQAAICFAWLLSSSPKPHKNIQYHKDKIVFECV  
VGSTVGFVALLSYIGLLAILSFLLAFLARNLPDNFNEAKLITFSMLIFCAVWVAFVPAYINSPGKY  
ADAVEVFAILTSSFGLLVALFGPKCYIILFRPERNTKRAIMAR

>Tr\_8\_8\_YP

QSLGLLELLLLASFCQNEELVCROIGAVERPQLSKDGDILLGGIFSFSKWKDKWNTYKQK  
PPPLQCTSLNFRGFQFAQAMLFAIDEINNSTNLLPGILLGYKIYDACASIARSVRVALALANGN

QVESSLKGPCPKPAQVQAIMGETASSPCMAIATVIGPFHIPLVSKRNGYEYAFGWTWVGAI  
RTNDDYGNNGMATFIETAEELGICVEYSVAVFRTDPLDKIROIIDIIKASTSRVIVAFMANKDMDVL  
LSEMSQHNLTGYQWVGSESWISDSHTAAMDVHHILDGAVGLSIPKAHV  
TGMKEFILDVKQLNSSSKELFREFWEALFDCKFRNLASTTTENQRECSGHEDLAGVKNSFTYMSLMPIFYNIYKG  
VYAVAHALHDILSCNNTCNKTTELDPFMILQRIQRSQFKTKEGDEVYFNENGDPPAKYEIINW  
QPTENGFMDFVTVGLYDASLPADRQLTLQTTTFTWAQNSEQVPVSVCS  
EKCPPGTRKVLQKGKPVCCYDCLRCADGEISNNTG

>Tr\_8\_9\_YP

QGWALLQLLLLVSFSQAEDRVCLQMGPENPQLSKDGDII  
LGGIFSFHSSWKNRRDITYMHKPLPLQCISLNFRGFQYAQAMLFAIDEINN  
SSDLLPGITLGCKIYDSCGSIARGVRASLADKNKYPSFLRTIPSDHYQSRALAQLVKYFGWTWVGAI  
RTNDDYGNNGMATFIETAEELGICVEYSVAVFRTDPPEKIQQIIDVIKASTSRVIVGFLSHLDMDVLLI  
ELSQHNLTGYQWVGSEAWIFESHIAAMDVHHILDGAVGLSIPKAHV  
TGMKEYILGVKQLNSSSKELFRELWEALFDCKFEDSVSTTENO  
RECSGHEDLAGVKNTFTDMSLMPILYNIYKGVYAVAHTLHDVLS  
CNNTCNKTAQLDPFTILOHIKRIRFKTKEGDEVYFNENGDPPAKYEIINWQPTENGNVEFVPVGLYDASLPADRQLTL  
TNR TLVWAQNSEQVPVSVCS  
EKCPPGTRKVLQKGKPVCCYDCLRCADGEISNSTG

>Tr\_9\_3\_YP

NSKVPVSVCS  
ESCRPGTRKVPQKGKPLCCYDCISCAE  
GEVSNSTDANDCKKCPEEFWPNO  
NRDACVPKQVEFLSFTESMGVVLVFF  
TLLGFFLTLSVTALFVINKNTPLVKAN  
SELSFLLLFSLTLCFLCSLTFIGRPSG  
WSCMLRHAAFGITFVLCISCVLGKTM  
VVLMAFRATLPGSNVMKWF  
GPAQQRLSVLAFTLVQVLICILWLTIG  
PPFALKNTKHYKEKIILECALGSARH  
LYLNSKYTAASFILQKCVIISLQLSKL  
HLIMFK

>Tr\_9\_4\_Y

MPOVIAELFFIGLLLKL TSAQVRASSCOILGSPEFPLLSREGD  
WVIGGAFSVH  
SKVTOPSLSHO  
EKPAQISCSSVNLREFRFAQSMIFAIEEINKSDFLLPNV  
SIGYRIYDTCGSTLSSVRAAMALMN  
GESTAGKNCSYRSSVHAIIGESESFSTIVLSRLTGPFEIPVISHSATCECLSDRKEHPSFFRTIA  
SDLYQSRALAQLVKHFGWTWVGAVNSDSYGNNGMAIFLTA  
AQEEGVCVEYTEKFHRAEPE  
KLLKVVEVIRRG  
TARVIVGFLAYVEMNLLQQLSLHNVTGLQFVGVEAWITAN  
SLVTPTSFGVL  
GGSLGFAVEKAAISDLDDFLIGDFWETEF  
ECKETIEDGMAGPATCQENGD  
LAAFKGYADDVA  
ELRYS  
GNIYKAVYAVAHSLHSTLQCSISGVCDKTVKVTHQQVEIHL

>Tr\_8\_5\_Y

QGWALLQLLLLVSFSQAEDRVCLQMGPENPQLSKDGDII  
LGGIFSFHRSWINRRDITYMHKPLPLQCISLNFRGFQYAQAMLFAIDEINN  
SSDLLPGITLGCKIYDSCGSIARGVRASLALINSO  
ETIFKLSDKCTKPAQVQAIMGESSSSPNMAVATVIGPFHIPLVGKSQHGFFHYVCVIVMLFPCL  
SLKEEITHF\*NQRECSGHEDLAGIKNTFTDMSLMPIFYNIYKEVYAVAHALHDILSCNNTCNKT

AQLDPFTILQHIKRIRFKTKEGDEVYFNENGDPPAKYEIINWQPTENGNVEFVPVGLYDASLPA  
DRQLTLTNRTLWVAQNSEQVPVSVCSCEKCPPGTRKVLQKGKPVCCYDCLRCADGEISNSTG  
QVFO

TVIIKPTTEKRRTPIVRANSELSFLLLFSLTLCFLCSLTFIGRPSGWSCMLRHTAFGITFVLCISC  
VLGKTMVVLMMVFRATLPGSKVMKWFPGPAQQRSLVLGFTLIQAFICLLWLTISPPFPFKNIKDF  
KDRILECALGSAVGFWAVLGYIGLLAMFCFILAF LARKLPDNFNEAKFITF SMLIFCAVWVTFI  
PAYVSSPGKFSVAVEIFAILSSGFLLICIFIPKCYIILLK PDRNTKRNL MGKE

>Tr\_8\_6\_FP

XLDGAVGLSIPKAHV TGMKEFILDVKPLNSSIEELFREFWEALFDCKFEDSVSTTTENQRECS  
GHEDLAVVKNTFTDMSLMPIFYNVYKEVYAVAHALHDILSCNNTCNKTAQLDPFTILHHIKK  
RFKTKEGDEVYFNENGDPPAKYEIINWQPTENGNVEFVPVGLYDASLPADRQLTLTNRTLWV  
AQNSEQVPVSVCSCEKCPPGTRKVLQKGKPVCCYDCLRCADGEISNSTDSISCVRCHSEFW  
SNERRDACIKKKEEFLSYEEMMGALLTAASLLGTCLTAVVMFIFFRYRRTPIVRANSELSFLL  
LFSLTLCFLCSLTFIGRPSGWSCMLRHAAFGITFVICISCVLGKTMVVLMAFRATLPGSNVMK  
WFGPAQQRSLVLGFTLIQAFICLLWLTISPPFPFKNIKDFKDRILECALGSAVGFWAVLGYIGL  
LAMLCCFLAFLARKLPDNFNEAKFITF SMLIFCAVWVTFIPAYVSSPGKFSVAVEIFAILSSGF  
LLICIFIPKCYIILLKPERNTKRNL MGKE

>Tr\_8\_4\_Y

QSLGLLELLLLLASFCQNEELVCROIGAVERPQLSKDGDILLGGIFSFHSHKWKDKWNTYKOK  
PPPLQCTSLNFRGFQFAQAMLFAIDEINNSTNLLPGILGCKVYDSCGSIARGVRASLALINSQ  
ETTFKLSDKCTKPAQVQAIMGESSSSLNMAAATVIGPFHIPLISHFATCDCLSDKNKYPSFLRT  
IPSDHYQSRAAQLVKYFGWTWVGAI RTNDDYGNNGMATFIETAEELGICVEYSVAVFRTDPP  
EKIQIIDVIKASTSRVIVGFLSHRDIYVLILEMSQHNLTGYQWVGSEGWIFDSHTAAMDVHYIL  
DGAVGLSIPKAHV TGMKEFILDVKLLNSSSKELFREFWEALFDCKFEDSASTTTENQRECSG  
HEDLAGIKNTFTDMSLMPIFYNIYKEVYAVAHALHDILSC

>Tr\_8\_1\_F

MTPTLMWPEKVVGLFLLVLSFSQACGOVCRHIGEVEKPOLSKEGDVLGGIFYFHNRWKTR  
ENAYTAKPLPTECRSLNFRGFQFAQAMLFTINEINKSTDLLPDVIVGYKIYDSCANIVNSIKLVL  
ALTNRODKESASDEESCTKPAQVQAIMGESSSPCTAIASVIGPFHIPVISHFATCACLSDKNK  
YPSFLRTIPSDHYQSRAAQLVKYFGWTWVGAVRSNDDYGNNGMATFIETAEELGICVEYSV  
AVFRTDPMIKILOIIDIISSTSKVIVTFLSPGDLNVLLQEF SQHNLTGYQWVGSESWISDSHIAA  
MDVHHILDGAVGLSIPKAHV TGMKEFIMDVKQLSSSSKELFREFWEALFDCKFEDSVSTTTE  
NQRECSGHEDLAGVKNIFTDMSLMPIFYNIYKGVYAVAHALHDILSCNNTCNKTAQLDPFTIL  
QHIRSTHFKTKEGDEVYFNENGDPPAKYEIINWQPTENGNVEFVPVGLYDASLPADRQLTLTN  
RTLWVAQKKSLOVPVSVCSCEKCPPGTRKVLQKGKPVCCYDCLRCADGEISNSTDSISCVRC

HSEFWSNERRDACIKKKEEFLSYEEMMGALLTAASLLGTCLTAVVMFIFFRYRQTPIVRANNS  
ELSFLLLFSLTLCFLCSLTFIGRPSGWSCMLRHTAFGITFVLCISCVLGKTMVVLMAFRATLPG  
SNVMKWFGPAOQRLCVLGFTLIQVIICILWLSISPPSPNKNFNVAKDRIILECALGSALGFWAV  
LGYIGLLAMFCFILAF LARKLPDNFNEAKFITFSMLIFCAVWTFIPAYVSSPGKFSVAVEIFAILS  
SSFGLLICIFIPKCYIILLKPERNTKKNLMGKE

>Tr\_7\_1\_F

MQLAVGVLFVTLMAVRGGDLVCQTYGKELSQFSMEGDINIGGIFSFHQNPVTIDPALHFNP  
EMIQCEGLDPGELOYAFTMMFAINEINNSSDLLPGLILGYRIFDSCPSVPLSIRASLNLMNRYE  
SGGDSCSKLSNVHAVIGETTSTSTIGIARTMGPFLIPVISHSATCACLGNRRDYPAFFRTIPSDI  
YOSQALAKLVKHFGWTWVGAI RTNSDYGNNGMTAFLKAAEKEGVCVEYSVAIYRTDPRKWF  
LEVVDIISKSTSKVIVAFVDGTDLDILVKELHAQSVTGLQWVGSEGWITYRFI ASPENYAVVOG  
AVGFAALNTHLPGLQEF LADSRPSTTPGNNGLVELWETVFKCTLS PRAQSPLAACTGKESLR  
DASTRFTDVSDASLLNNVYKATY AIAHALHLLLTCKE GEGPFENNTCADRHNVQPWQVLHYL  
TLVNFTTKIGDNVHFDEMGDPVPRYALVNWQMDEAGYVLFETIGDYDASRPEGHQFQMND  
GVKALWAGENLEVPRSVCS E SCLPGTRRAFVKGRPICCFDCIACADGKFSNSTNAVKCDKC  
PPEYKSNEERNNCNLKAIEFLTFRELMGILLVAFSVFGACLSTTIALIFFHFRQTPIVRANNS  
EL  
SFLLLFSLTLCFLCSLTFIGRPS EWSCMLRHTAFGITFVLCISCILGKTMVVLMAFRATLPGSN  
MMKWFGAAOQRLSVLFTLVQVLICILWLTINPPFPFKNTKHYKDKIILECALGSALGFWAVLG  
YIGLLAVLCFVLAFLARKLPDNFNEAKFITFSMLIFCAVWTFIPAYASSPGKFTVAVEIFAILASS  
YGMLFCIFLPKCYVILLK PENNTK KKL MGKV

>Tr\_10\_1\_F

MPVCVCMMLLFALFHGAFGAEDNLKCKMLGRPEFPLLSQEGDITIGGAFTLHSQMSKPSLS  
FEETPEDLTCSRINLREFRFAQTMIFAIEEINNSSLLPNISIGYKVFDT CGLTLPSTRAVMALM  
NGKTRTPEGGCSSRTSVHAIIGASESSSTIVMLQISGIFQIPVISHFATCACLSNRKEYPSFFRT  
IPSDFYQSRALAKLVKHFGWTWVGAVKSDNDYGNNGLATFIMAAEQEGVCVEYSEGF SWT  
DPSEQIARVVTVIKSGSARV LVAFLAQSEMSALLEEAVKQNL TGLOWVGS ESWITAGHLALKK  
YSAILTGSLGFTIRKTKITGLQEFLLQVNPSQNPQNNLLKEFWETTFGCSFQSDVHGATQCS  
GVEKLDIQNPFTDVSELRISNNVYKAVYAVAHAMHSM LKCGQS GEAVNQSCTTKKDFELK  
QVVEHLQSVNFTLQSGERVYFDDYGDPAATYELVNWORSPEGNTVFVVVGN YDASQPNGR  
QFTMNNINITWAARLOKRPLSVCSQSCIPGFRQAVIKGK PICCFTCVACAAGEISNSSNSAEC  
LOCPLEFWSNEDHSQCVPKVI EFLSFEETMGALLAAVSLFGAAL TSLVFCVFFRFRHTPLVKA  
SNSELSFLLLFSLTLCFLCSLTFIGRPSRWSCVLRHTAFGITFALCMSCVLAKTVAVLFAFTAKR  
PGNTVFYCSVPLQRTSVFACITLQVIICVLWLT LAPPHPHKNTAHAKERIILECNLGSPVWFVW  
VLGYIGLLAVICFILAF LARKLPDNFNEAKFITFSMLIFCAVWTFIPAYVSSPGKFTVAVEIFAILA  
SSFGLLFCIFAPKCYILILKPEKNTK KHM MGRN

>Tr\_9\_1\_FP

NSKVPVSVCSSESCRPGTRKVPQKGKPLCCYDCISCAEAGEVSNSTDANDCKKCPEEFWPNO  
NRDACVPKQVEFLSFTESMGVVLVFFTLGFFTLTSVTALFVINKNTPLVKANSELSFLLLFSL  
TLCFLCSLTFIGRPSGWSCMLRHTAFGITFVLCISCVLGKTMVVLMAFRATLPGSNVMKWFG  
PAQQRLSVLAFTLVQVLICILWLTIGPPFALKNTKHYKEKIILECALGSVGFVAVLGYIGVLAVL  
CFILAFARQLPDNFNEAKFITFSMLIFCAVWITFIPAYVSSPGKFTVAVEIFAILASSYGLLFCIFA  
PKCFII

>Tr\_9\_2\_FP

MPOVIAELFFIGLLLKL TSAQVRASSCQILGSPEFPLLSREGDWIGGAFSVHSKVTQPSLSYR  
EKPAQISCSSVNLREFRFAQSMIFAIEEINKSDFLLPNVSIYRIYDTCGSTLSSVRAAMALMN  
GESTAGKNCSYRSSVHAIIGESESFSTIVLSRLTGPFEIPVISHSATCECLSDRKEHPSFFRTIA  
SDLYQSRALAQLVKHFGWTWVGAVNSDSYGNNGMAIFLTAQEEGVCVEYTEKFHRAEPE  
KLLKVVVEVIRRG TARVIVGFLAYVEMNNLLOQLSLHNVTGLOQFVGVEAWITAXFLLKTEDIMWP  
GGKREANICHYSNIYILGG LICGKNEIEL

LFNSKVPVSVCSSESCRPGTRKVPQKGKPLCCYDCISCAEAGEVSNSTDANDCKKCPEEFWP  
NQNRDACVPKQVEFLSFTESMGVVLVFFTLGFFTLTSVTALFVINKNTPLVKANSELSFLLL  
FSLTLCFLCSLTFIGRPSGWSCMLRHTAFGITFVLCISCVLGKTMVVLMAFRATLPGSNVMK  
WFGPAQQRLSVLAFTLVQVLICILWLTIGPPFALKNTKHYKEKIILECALGSVGFVAVLGYIGV  
LAVLCFILAFARQLPDNFNEAKFITFSMLIFCAVWITFIPAYVSSPGKFTVAVEIFAILASSYGLL  
FCIFAPKCFII

>Tr\_12\_1\_F

MSWMGWIPSQRGVQLLCLLCMIIPVIALLDQSQHCRVIPGSM SLPVLEKRGDIILGGLFSL  
HDMVVEPNLSFTSTPPPTQCTRF SFRTFRWMQTMIFAVEEINRNAEILPDITLGYKIYDSCSTP  
HQSLKAAIDL MGSEKDSQFEGKLOREGCDGNVPAVIGDGGSTQSLVVARFLGVFHVPOVSY  
FSSCACLSDKTQFPAFLRTMPSDLFQVGALVQLVKYFGWTWVGVIAGDDAYGRGGAAIFAN  
EVRRLGACIALYEMIPKTQSQA AISSIISNIRSSGARVVLVFAVEQDVARLFDEAVROKLTGIOW  
LASEAWSTAAILSTPKRYHHILOGSMGFAIRRADIPGLQDFLLRLHPSSAEADDDPFLIPFWE  
VFQCSLDPHGHSEAKRPCSGTEELRSVKNIYSDVSQLRISYNVYKAVYALAYAIKAMRSCEK  
GSGPFSQQACPDLDNIHPWQLHHYIKQVNYTNRF GDEIKFDENGDP AAMYDLINWQLTPG  
GDMDFVTVGKFDIAGTGRKNLHIEEEKIVWNGNNTQVPLSVCSSICPPGTRKAIRPNYPICC  
HDCVVCTAGEISNQTDAIECARCLPEFWSNADRTACVPKQVEFLSFGDTIGIALLVVSLIGSFL  
TCAVALVFFYHRTSPIVRANNSDLSFLLLFSLTLCSLTFISPPS QWSCMLRHTAFGITFVLC  
ISCILGKTIVVLM AFRATLPGSDVMKWFGPGKQKAITFSTLVQVVICTVWL VVAPPTPROQYMP  
RESAIIILLCDEGSTIAFSLVLGYIGVLACMCFLLAFLARKLPDNFN EARLIAFSMLIFCAVWVAF  
VPAYISSPGKYSTLTEIFAILASSYGLLGCIFAPKCYIILMKSEKNTRKHLMSKS

>Tr\_8\_3\_Y

QGWALLQLLLLVSFSQAEDRVCLQMGPENPOLSKDGDIIILGGIFSFHSSWKNRRDITYMHK  
PLPLQCISLNFRGFQYAQAMLFAIDEINNSSDLLPGITLGCKIYDSCGSIARGVRASLALINSQ  
ETIFKLSDKCTKPAQVQAIMGESSSSPNMAVATVIGPFHIPLISHFATCACLSDKNKYPSFLRTI  
PSDHYSRALAQLVKYFGWTWVGAI RTNDDYGNNGMATFIETAELGICVEYSVAVFRTDPP  
KKIQQIIDIIKASTSRVIVGFLSHLDIDVLILEMSQHNLTGYQWVGSE  
WIFESHIAAMDVHHILDGAVGLFIPKAHV TGMKEYILGVKQLNSSSKELFRELWEALFDCKFE  
DSVSTTTENQRECSGHEDLAGVKNTFTDMSLMPILYNIYKGVYAVAHTLHDVLSCNNTCNKT  
AQLDPFTILQHIKRIRFKTKEGDEVYFNENGDPPAKYEIINWOPTENGNVEFVPVGLYDASLPA  
DRQLTLNRTLVAQNSEQVPSVCSEKCPPGTRKVLQKGPVCCYDCLRCADGEISNSTG  
SNWMSKCKLLFGHKHOSHSLILILOQLVLR LYIHSPDLFEENTKNLTPHIIARPFVQ\*HSCSS  
VVENVTRAMLLHFKNLSQVIKHCSGR  
KEGDNTFRTIPSDHYOSRALAQLVKYFGWTWVGAI RTNDDYGNNGMATFIETAELGICVEY  
SVAVFRTDPPDKIKQIIDVIKASTSRVIVGFLSHRDIYVLILEMSQHNLTGYQWVGSEGWIFDSH  
TAAMDVHHILDGAVGLSIPKAHV TGMKEFILDVKLLNSSSKELFREFWEALFDCKFEDSASTT  
TENQRECSGHEDLAGIKNTFTDMSLMPIFYNIYKEVYAVAHALHDILSCNNTCNKTAQLDPFT  
ILHHIKRIRFKTKDGEDEVYFNENGDPPAKYEIINWOPTENG
