# Supplementary material for: Evolution and origin of vomeronasal-type odorant receptor gene repertoire in fishes
Source: PubMed Central journal article supplement (PMC1601972; doi:10.1186/1471-2148-6-76), 2006-10-03
Supplement: 1471-2148-6-76-S10.pdf [file 1471-2148-6-76-S10.pdf]

>Tn\_12\_1\_F

TFLSLLWCVINATTTSHHCRVIPGSLSLPVLEKRGDIILGGLFSLHDTVPEPNMTFTSTPAPTO  
CTRFSFRTRWQMIFAVEEINRNPELLSNITLGYKIYDSCSTPHQSLKAAIDLMGSEKDSQ  
SEGEMQSEGCDGNVPAVIGDGGSTQSLVVARFLGVFHVPOVSYFSSCACLSDKK  
FPAFLRTMPSDLFQVGALVQLVKHFGWTWVGWVAGDDAYGRGGAAIFANELQKLGACVAFY  
EMIPKIQSQAASAIISNIRSSGARAVLVFAVEQDAARLFEEADREGLTGIQWLASEAWSTA AVL  
STPKKYHHILOGSMGFAIRRAHIPGLQDFLLRLHPSSPDADEDPFLVPFWEVFOCSLGTRS  
KDRHTRSEGKPPCSGTENLOSVKNIYCDVSQLRISYNYKAVYAIHAIAKAMRSCVRGNGPF  
SQQACPDLDNIQPWQLHHYIKQVNYINRFGDEIKFDVNGDPAAMYDLVNWQLTPSGDMEFV  
TVGKFDKIGADGRKNLHIEEEKIVWNGNKSQVPLSVCSSICPPGSRKAIRPHFPICCHDCVVC  
AAGEISNQTDAIECVRCLPEFWSNADRTACIPKQVEFLSFSDIIGIVLLVISLIGSFLTCTVALVFF  
YHRTTPIVKANNSDLSFLLLFSLTLCFLCSLTFISQPSRWSCILRHTAFGITFVLCISCILGKTIV  
LMAFRSTHSSKVLKWFPGPVRQKAITFSTLVQVICTVWLVLAPPTPQRYMPREGAIIILLCDE  
GSTLAFSLVLGYIGLLASLCFILAFARKLPDNFNEARLIAFSMLIFCAVWVAFVPAYISSPGKY  
STLTEIFAILASSYGLLGCIFAPKCYIILIKSEKNTRKHLMSKR

>Tn\_9\_1\_F

MPQVMTALLFVGPLLTWAVPVRAFSCKILGSPERPLLSRRGDVVIGGAFSIHSKIPPLSYO  
TKPAQLLCFSVNLREFRFAQTMIFAIDEINRSEFLLPNVSIGYRIYDNCGSTLSSVRAAMALMN  
DDEKTAGNNSCRLSSVHAIIGESSESSSTIVLSRLAGPFKIPVISHSATCECLSDRKAHPSFFRTI  
ASDRYQSRALAQLVKLFGWTWVGAVNSDSYGNNGMAIFLVCVGYTEKFHRAEPEKLLKVV  
EVIR  
STARVIVGFLAHVEMNDLLQQLSLHNVTGLQFIGVEAWITANSLVTPTSFNVLGGPLGFAVEK  
ANIDGLDDFLIRDFWETKSECKEMKEDDATGTTTCGENHDLTEFKGYADDVAELRYSSNIYK  
AIYAVAHSLHSFLKCSSESNVCNKTMNVTPQQVGITHWDSLKAVNFTTKTGEQVWFDGTGAT  
VARYEVNWQRSSDGSIQFKPVGFYDASLPPGLRFLLRVEDIMWPGGKTEVPVSLCSESCR  
PGTRKVPOTGKPLCCHDCISCAEGEISNSTDANDCEKCPPELWPNQNRDACVPKTVEFLYF  
TEFMGIVLVFFTLGCVFFTLVTALFLIHKDTPLVRANSELSFLLLFSLTLCFLCSLTFIGRPSE  
WSCMLRHTAFGITFVLCISCVLGMVVLMAFRATLPGSHVMKWFGPAQQRLSVLTFTLVQV  
LICILWLTNDPPFPLRNTKHYKGIILECALGSAIGFWAVLGYIGVLALLCFILAFARQLPDNF  
NEAKFITFSMLIFCAVWITFIPAYVSSPGKFTVAVEIFAILASSYGLLFCIFAPKCFIIVLKPQLNTK  
KHMMGKT

>Tn\_10\_1\_F

MSDSTCVIFLVLFHEAFGAEDSLRCEMMGRPEFPLLSKKGDIIIIGGAFTLHNQMSKPSLSFE  
VTPEDLTCSRINLREFRFAQTMIFAIEEINSSLLLLPNISIGYKIFDTCGLTLPSTRAVMGLMNG  
KTNASDRGCSRRASVHAIIGSSESSSTIVMLQISGIFHIPMISHFATCACLSNRKQYPSFFRTIP

SDFYQSRALAKLVKHFGWTWVGTVKSNDYGNNGLATFIMAAKQEGVCVEYSEGFSWTDPS  
SEQIARVVTVIKSGSAKVLVAFLAQSEMSVLLLEAVKQNLTLGLQWVGSESWITAGHLAVKKYS  
AILMGSLGFTIRKTKITGLQKFLQVNPSSQDPQNNLLKEFWETTFSCSFQSDMHQGTQCSG  
TEKLNDIQNPFDTVSELRISNNVYKAVYAVAHAMHAMFKCDQSGEAVNQSCTSNEDEFELKO  
VVEHLQRVNFTLOSGETVYFDDFGDPAATYELVNWQRSQAGNTVFMVVGNYDASQPNKRO  
FTMNSMNITWAAGLQKRPQSVCQSCIPGFRQAVIKGKPICCFTCIACADGEISNSSNSAEC  
LPCPLELWSNEHHSQCVPKMIEFLSFEETMGALFAAVSLFGAALTSLVFCIFFRFRHTPLVKAS  
NSELSFLLLFSLYLCFLCSLTFIGRPTRWSCMLRHTAFGITFALCMSCILAKNVAVLFAFTSKRP  
GKTFYCSVPLQRTSVFSCIILQVLICVLWLTFAAPPFPYKNTTHAKEHIILECHLGSPVFWVW  
MGYIGLLAVICFILAF LARKLPDNFNEAKFITFSMLIFCAWITFIPAYVSSPGKFTVAVEIFAILAS  
SFGLLFCIFAPKCYILVFKPEKNTKKHMMGRN

>Tn\_7\_1\_PF

TLLAVIEMF

SLENNVSVDTCKICTVCLFVRQONCLAYSCSKLSNVHAVIGETTSTSTIGVARTMGPFLIPVISH  
SATCACLGNNRRAYPSFFRTIPSDIYQSQALAKLVKHFGWTWVGAIRTNSDYGNNGMTAFLEA  
AQKEGVCVEYSVAIYRTDPRKWFLEVVDTIKKSTSKVIVAFVDGTDLDILIKELYAQSVTGLOW  
VGSEGWITYRFIASPVNAYAVKGA VGF SALNAHLPGLOEFLTESRPSTTPGNDGLVELWETVF  
KCTLNLGVQSSLA ACTGKESLRNASTRFTDVSDGSLNNVYKATYAIHALHMIFTCKDGEG  
LFENNTCADRHNVPQWQVLHLYLKQVNFTTKIGDHVFFDEMGPVPRYALVNWQMDDAGYV  
MFKTIGDYDASRPEGROFQMKDGVKALWAGGNLEVPKSVCSKNCLPGTRRAFVRGKPICC  
FDCITCADGEFSNSTNAVKCDKCLPEYKPNEERNKCHLKAIEFLTFRELMGTLLATFSVFGAC  
LSMAMALIFFYFRQTPLVKANNSELSFLLLFSLTLCSLTFIGRPSDWSCMLRHTAFGITFV  
LCISCVLGKTMVVLMAFRATLPGSHVMKWFGPAQQRSLVLTTLGQVLICILWLTIDPPFPFK  
NTKHYYKEKIILECAMGSAVGYWAVLGYIGLLAVLCFILAF LARKLPDNFNEAKFITFSMLIFCAV  
WITFIPAYASSHGKFTVAVEIFAM LASSYGMLFCIYLPKGYIILLKPEYNTRKNLIGKV

>Tn\_8\_1\_F

QGWALLQVLLVVSFSQAEDSVCLQWGGPQNPQLSKDGDII LGGIFS FHSSWKNTRD TYVVK  
PLPLQCISL NFRGFQFAQAMLFAIDEINSSDLLPALTLGYKIYDACGSIARGVKVALALANSE  
ERTFNLLEKCSKPAKVQAILGETSSSPCMAIATVIGPFYIPLISHFATCACLS DKNKYPSFLRTIP  
SDYYQSRALAQLVKYFGWTWVGTVRSNDDYGNNGMATFVDTAQELGICVEYSVSVFRTDP  
PDKIEQIIDIIKASTSRVIVAF LSHMDIDVLIHEM SHHNLTYQWVGSEGWIFDHHTAATDLHHI  
LDGAIGLSIPKADVAGMKKFILDV KQLNSSSQELREFWETLFNCKFKDLAPPS ENQRECSG  
HEDLTGVKNSFTDMSLMPIFYNVYKGVYAVAHALHDILSCNNTCNKTAQLDPFTILORIKKIHF  
KTKEGDEVYFNENGDPPAKYEIINWOPTQNGIVDFVTVGLYDASLPAKKQLKLNKTLVWAQ  
NSEQVPVSACSKKCPPGTRKLLQKGPVCCYDCLRCADGEISNSTDSITCERCHSEFW SNE

RRDRCIKKKEEFLSYEEMMGALLAASSILGTCVTAVVMFIFFKFRQTPIVRANNSALSFLLLFS  
LMLCFLCSLTFIGRPSDWSCMLRHTAFGITFVLCISCVLGKTMAVLMAFRATLPGSHVMKWF  
GPAQQRVSVLGFTLIQVFICILWLTISPPFPFKNIKDFKDRIILECALGSAVGFVVVLYIGLLAM  
FCFILAF LARKLPDNFN EAKFITFSMLIFCAVWVTFIPAYVSSPGKFSVAVEIFAILSSGFGLLICI  
FLPKCYIILLKPERNSKKNLMGRA

>Tn\_8\_2\_F

ERRCALLOVLLVVTFSQAEDSVCLQWGGPQNPQLSKDGDIIILGGIFSFHSSWKDTRDITYVN  
KPLPLOCISLNRGFOYAQAMLFAIDEINNSSDLLPAITLGYKIYDACGSIARGVKVALALANS  
EERTFNLEKCSKPAKVQAILGETSSSPCMAIATVIGPFYVPLISHFATCACLSDKNKYPSFLR  
TIPSDYYQSRALAQLVKYFGWTSVGTVKSNDYSNYGMATFVDTAQELGICVEYSVSVFRTD  
PPDKIEQIIDIKAAASRVIVAF LPNMDIEVLIHEM SHHNLTYQWVGSEGWIFEKHTAAKDLYHI  
LDGAIGLSIPKADVAGMKK FILDVKQLNSSSQELFREFWETLFNCKFKDLAPPS ENQRECSG  
HEDLTGVINGFTDMSLMPIFYNVYKGVYAVAHALHDILSCNNTCNKTAQLDPFTILQRIKKIHF  
KTKEGDEVYFNENGDPPAKYEIINWOPTONGIVDFVTVGLYDASLPAKKQLKLNKTLVWAO  
NSEQVPVSACSKKCPPGTRKLLQKGKPVCCYDCLRCADGEISNSTDSITCERCHSEFWSNE  
RRDRCIKKKEEFLSYEEMMGALLAASSILGTCVTAVVMFIFFKFRQTPIVRANNSALSFLLLFS  
LMLCFLCSLTFIGRPSDWSCMLRHTAFGITFVLCISCVLGKTMAVLMAFRATLPGSHVMKWF  
GPAQQRVSVLGFTLIQVFICILWLTISPPFPFKNIKDFKDRIILECALGSAVGFVVVLYIGLLAM  
FCFILAF LARKLPDNFN EAKFITFSMLIFCAVWVTFIPAYVSSPGKFSVAVEIFAILSSGFGLLICI  
FLPKCYIILLKPERNSKKNVMGRA

>Tn\_6\_1\_F

VCRLRDFAQMPPELAQDGFVIGGIFSFRTGQDYVSDTFQHIPEAPKCKNFNYREFKFAQTVIF  
AVGEINRNPDLLPNLKLGYKIYNACGTMGILRAALALVSGLENEINDENCTKTETIQAILGHSG  
SRPTIAFAQVVGRFHIPVISHFATCACLSNRKEYPTFFRTIPSDYYQSTALAKLVKHFGWTWIG  
AIAVDNEYGQGGIATFIQAAQEYGVCTEYSEFSSEGRPDTLQRIVNVV KRATSKVIVAFMSH  
REIGLLAQELHKQINITGLOWVGS DAWITDHSLTDSEGH SILVGS LGFTVSKAKILGLEEHLRO  
LHPAQFPVSQFMVDFWEDRFDCSLNATGNKQRRPCSGFESLQNDTSLFTDETEL RFTNNVY  
KSVYA

AHALDNLMKCEKGKGP

SNGGCADPKHIQPWQILHYINTVRFNTSEGETIYFDNNGDSPARYELVSLQMTNKG TLEGAT  
VGIYDASLPENLQFIISDGAIWGN GKMEVPVSVCSNSCLPGTHKVLQKGK PICCFDCVPCPA  
GEISNITNSIHCICPTLFWSSKERDACVPKTIEFLAHEELLG TLLVLC SLLGVFLT TIMFLVFC  
HKETPLVRANSELSFLLLFSLTL CFLCSLTFIGRPS EWSCMLRHTAFGITFVLCISCVLGKT V  
VLLAFRATLPGSNVMKWF GPAQQR LSVLAFTFVQVLTCTLWLTISPPYPFQNM EYYNDRIILE  
CALGSAVGFVAVLGYIGVLAMFCFILAF LARNLPDNFN EAKFITFSMLIFCAVWITFIPAYVSSP

GKFTVAVEIFAILASSFGLLFCIFLPKCYIILFRPELNTKKHIMGKA

>Tn\_6\_2\_F

IVLFTYCLLLIGAMSENQTCTVRGQTGFMEFSKEGDLIIGGVFSLTSTRVLVDNDYQAIPTYC  
NRWNDRELKFARTVIFTVEEINRDAELLPGVMLGYRLYNGCGSENLIRAALEAVTTESCSGOV  
QALLGHSSSGVTEDINVILSPLSIQVSHLSTCACLSDKKOYPTFFRTVPSDHFOISGLVOLLK  
IFNWRWVGIVYSVGSYSDEGTAHFVKEAKKDGICVEYRLPFSQVSRKKTRAIQALQESSR  
VVLLFLSLSNTKYFLOEMESYNISDKQWLGSSEWITQVDLASAKRRHIQGTGTFALPQAPIP  
GLGDFLLSLKPSDEPOSDLIKAMWEIFFKCSFSLSNTSAACTGTEDLRMVSNDYTDVRHFRA  
ENNVYKAVYLVAAHALHALLOCKNGSNPTTGKPCVNKTEVKPKLLEHIKYVNFSTTKYGSKVF  
FDENGDSVAQYDLVNWQMKEDGSVNIVTIGQYDTS  
GEELKLT DSTKIVWGGNHKEVPRSVCREPCPPGTRKAINKLPVCCFDCFECPQGTISNQTD  
SLDCFSCLPELWPNDQKNQCLPKPSEYLSYREITGALLCGFGCLGVFLSVLTTIIFLIHKETPIV  
KANSELSFLLLLSLKLCFLCSLTFIGRPSEWSCMLRHTAFGITFVLCISCVLGKTVVVLMAFR  
ATLPGSKVMKWFGPAOQRLSVLIFTLIQVVICIFWLTTNPPFPLRNMSYYKEKIILECALGSAV  
GFWAVLSYIGILAILCFILAFLARKLPDTFNEAKLITFSMLIFCAVWITFIPAYISTPGKFTVAVEIFA  
ILASSFGLLFCIFFPKCYIIIFKPERNAKKVCWERY

>Tn\_2\_1\_F

DLISLYSFCFVTVFSDLMTNATFPPSSLCRLQNTFQPGFAASGDFIIGGMFPLHFNQETPDLN  
NTYRPAPVKCNGFDPRAYRWAQTMKLAVEEINOSKDLLPNHILGYKLFDSGYP LTGQRAA  
LSLLNDPSTDGSPCTGTGPLLAVIGESSSSLSVMLSGILOPFRIPVISYFSSCACLSDKRKYP  
NFFRVIPNDDYQVKAIAQ  
LVHFNWTWVGLLLCDREYGOFAAEGLLREL RGTKVC GAYQKIIPLVYDRQRIQEILQVMRSS  
SAKVVVVFSAEVEMIPLMRDYIKQ NITGIQWIASEAWVTASVFTGSKYYPYLG GTIGLGIRKGH  
IPRLSDYLLTVNPQTYPNDLLFEELWEALYGC RPSISSSSSVPLCTGOEPLLEQHS AFMNTSS  
PRVAYNVYKAVYIAHSLHNLVCQPKPGPFKNDTCVQNNNVQPWQLOYYLQEVRFKIAGE  
EVDFDQKGDSIPYYDIISWQMGVDGKIKFVNVGLFDGSKPPGKELV IQEDRIVWAGHOREAS  
LSICSASCLPGTRKAIRKEVPVCCFDCIPC DTGKISNETDSVDCMFCPEDFWSNP NKTACIPK  
KVEYLAYDSLGI ALMVTAVVGACTTIAIFAVFFYHRNTPIVRVNNAELSF FILLALVLCFLCSLVI  
GEPTSWSCMLRHTAFSITFSLCFSCILGKTLVVLAAFTATRPGYNIMKWLGP KQORAIIF SCTL  
VQVIICIAWLIEAPPAPFRNTEYEHSKVILECSVGS SVAFWCVLGYIGLOACL SFILAFLARKLP  
GNFNEAKFITFSMLIFCAVWLA FIPAYVSSPGNYSDAVESFAILASSFGLLFCMFAPKCYIILLK  
PERNTKQNLMAKE

>Tn\_14\_1\_Y

TLLFWAIASIPFPVFSGLQQIANEKNNIILDSGLEADGGND AFASLPQCVKATDAEHPALHAG  
GDVVIGGIFPLHYSASVPPQTYTNKPELLTCSGFDHRAFRWMMTMVFAVMEINNNSSLLPG

VKLG YRIVD GCDHIPTS LQALLSLVKESMAGEQVMKTIPACLT DSPVA AVIGLASSSPTRAAA  
HILGSFNIP LVS YFATCTCLNDKHEYP SFLRTVPSDLFQIGGLVQMVTFMGWFWVGTIGTTDD  
YSLYG IQAF SHQLRQQSGC VEFQLIIPKSPTAAEIKELADKLOSSTARV VVVFAREGQLLDFFL  
ELIYRNVTGIQWIA SEAWVTASLLTTPRFHALLGGTLGFSFPGVEIPGLKEFLINVRPSPEPGM  
EFVNMFWEDIFGCVLKFTGEDLRGDNVNALKESMKLNDLGRSLDTKPICTGSEDLRYTHSS  
YIDVSQVRISYSVYKAVY AIAHALHSLLKCESPVSDMDLTCKKHEPFTSKQLLQHLKSVNFTN  
QFKEKVYFDEKGE PVPLYDVINWQKDSRSNIRFVKVGSYDGSAPLKQRLOIDPNAIVWTGG  
QSKVPVSQCSAPCPPGNRQARRPGOQCCFDCVPCADGQISNOTGSTECQSCPEYYWP  
DKDKVKCLPGIEEFLSFSEAMGIVLVILSLLGVILAF TLTIIFHHFRSTAIVKANNSEISFLLLLSLK  
LCFLCSLLFIGOPSLWKCR LRQA AFGISFVLCLSCLLVKTIVVLF AFR  
ANLKARCLAPK LFGPSRQRTLILLTTAPQVCLCTAWLLAAPSFPFKNPTYQALTGKIVVECKEP  
WPPGFYLV LG

I

LLAFIY LLLAFVRRKLPDTFNEAKLITFNMMIKWDVWISLKPAYVRSTGKLTVAVEVFAILASSF  
GLLLCIFLPKCFILLLHPERNVKRGM TGKY

>Tn\_4\_2\_PY

SALFLGLISLCDLSSAANLKASGNSLEEQVGLREDRTGAGAPFEK CQLOGSARLP AF SMAG  
DFVIGGVFSIHR  
KVTEEHNYTTVPEPFRCSGRIHPAQLOFSRAMVFAIEEINNSTELLPGIRLG YQIYDSCAAVPIA  
VHAAFQLLNGLDPVFD TGDNC S QSGMVMMAIVGESGSTHSISISRVIGSFDIPLVSHFSTCACL  
SDKQMYPTFFRTIPSDQFOADALAKLVKHFGWTWIGAVCSDSDYGNNGIAAFLRAAQKEGI  
CVEYSECL

>Tn\_4\_1\_F

STLFLGLISLCDLNSAANLKAAGNSLEQQVGLREARTGAGAPFMKCQLOGSARLP AF SMAG  
DFVMGGVFS LH HYKVTEEHNYTTVPEPFRCSGSIDPRELRLSHAMVFAIEEINNSTELLPGIR  
LG YQIHDS CAAVPIAVH VAFQLLNGLDPVFD TGDNC S QSGMVMMAVVGESGSTPSISISRIIGS  
FDIPLVSHFATCACLSDKQMYPTFFRTIPSDQFOADALAKLVKHFGWTWIGAVCSDSDYGN N  
GIAAFLHAAQKEGICVEYSESFYRTHPYSRIKRVADVIRRSTANVVVAFTSSGDLRILLEELSRE  
PPPPRQWIGSESWVTDLDMLRFSFCAGTIGFAIQRSVIPGLREFLLGLSPSKAASSSLLTEFW  
EDSFNCR LDKAAAAGERVCDGSE DITTLQSPYTD TSE  
RITNMVYKAVY AIAHAIHNAVCQGSNSTNOCDKFTRINPKQVLT ELKRVNPFHNGETVSFDAN  
GDPVASYELVNWKKRDSGSIDVVPVGYDASQPEGOELRIYRDITWVDGRTQVPOQSVCSNS  
CPPGTRKVLQKGK PICCYDCVQCPEGEISNVTDSPDCVPCINNF WPNPVS NACFPKPV EFL  
SFSEVLGMILAVFSVGGACLA VIIAAVFFHHRACPIVRANNSELSFLLLFSLTLCFLCSLTFIGAP  
SQWSCMLRHTAFGVTFVLCISCVLGKTVVWLMAFRATLPGSNVMKWFGPPQORLTVFTFTAI

QVLICIVWLVSPPYPVKNLSTYKDRILECALGSALGFWAVLGYIGLLAAVCLVLAVLARKLPD  
NFNEAKLITFSMLIFCAVWITFIP

YVSSPGKFTVAVEIFAILASTFGLILCIFAPKCFIILFKPEKNTKKKLMNKK

>Tn\_16\_1\_Y

AQPFFFFFFFHCLMFEEKOPTYV

SCFGEKSFIEIMIFKIFFQKLGLGNHFS

MCHCITFMLRELKTIPSTLYQTFLFIRYFFVFFSGLNKIMKHLGAKIHSMSPKVEARMAKISTAT  
VNFPG

SYFATCSCLSNRQMFPSFFRTIPSDAFQVRAMIOILKHFGWTWVGLLVSNDYGHHAARF  
QSDLAESGGGCLAYLEVLWPGEDWPELRRIVDVMKKSTARVVIVFAHESHMITLMEEVMRO  
KVTGLOWIASEAWTAASVLHTPRLVPYLAGALGAIIRGEISGFREFLLOIHPGEHFNDVETN  
MVKQFWEHTFOCRFAPPPAGQADGRERLCTGRELLKDAETEFMDLSNLRPEYNVYKAVYA  
LAYALDNMLKCKQGQPFSGQRCGRLEQWQLVYYLEKVNFTTPFGDOVSFDENGDLV  
PIYDIMNWLWLPDGKIKVQNVGEVKKSPLRREEVRIQENQIFWNFEFKQPPQSVCSQSCPP  
GTRVSRKQPVCCFDCLTCSEGKFSNKTNSMECTSCPEDFWSCSQRDHCVPKKTEFLSY  
HDPLGICLTVASLLGTVISAVVLGIFIHHRSTPIVRANSELSFLLLVSILKCFCSLLFIGHPRLW  
TCQLRHAAFGISFVLCVSCILVKTMMVVLAVFSASKPGGVAILKWFGAVQQRGTVLGLTLVQAAI  
CIVWLLSSPPKPHKNTQYHTDKIIFECVIGSTVGFVLLSYISLLAILSFLLAFLARNLPDNFNEA  
KLITFSMIIFSAVWVAFVPAYINSPGKYADAVEVFAILTSSFGLLVALFGPKCYIILFOPERNTKRA  
IMAR

>Tn\_4\_3\_P

VWLVSPPYPVKNLSTYKDRILECALGSALGFWAVLGYIGLLAAVCLVLAVLARKLPDNFNEA  
KLITFSMLIFCAVWITFIPAYVSSPGKFTVAVEIFAILASTFGLILCIFAPKCFIILFKPEKNTKKYLM  
NKK

>Tn\_16\_2\_PY

SHLLPNVTLGYSLYDNCIKLAIGFRAALSLISGEEEQFILTDDCKGSPPVIGIVGDSSSTPSIAIS  
TVLGLYRVPMVSYFATCSCLSNRQMFPSFFRTIPSDAFQVRAMIOILKHFGWTWVGLLVSND  
DYG

HAARFQSDLAESGGGCLAYLEVLWPGRRLARV

RIVDVMKKSTARVVIVFAHESHMITLMEEVMROKVTGLOWIASEAWSAAFVLHTPRLVPYLAG  
TLGAIIRGEISGFREFLLOIHPGEHFNDSIETNMVKQFWEHTFOCRFAPPPAGQADGRERLC  
TGRELLKD

>Tn\_7\_CaSR\_F

MRLALCYLVLLGSGYVISTYGPNQRAQMTGDILLGGLFPIHFGISSKDENLAARPESTKCVRF  
NFRGFRWLQAMVFAIEEINNSSTLLPNITLGYRIFDTCNTVSKALEATLSFVAQNKIDSLNLDE

FCNCTDHIPATIAVVGAAGSAVSTAVANLLSLFYIPQISYASSSRLLSNRNQYKSFMRITPTDEY  
QATAMADIIIEYFEWNWVIAVASDDDDYGRPGIEKFEKEMEERDICIHLNELISQYFGDHEIKALV  
DRIENSTAKVIVVFASGPDTEPLIKEMVRRNITDRIWIASEAWASSSLIAKPEYLDVVAGTIGFVL  
KAGNIPGFREFLOQVQPKRDGHNEFIREFWEETFNCYLEDSPRLHESENGSDSFRPLCTGE  
EDITSVETPYLDHHTHLRISYVAVYSIAQALODILSCTPGHGLFANNSCADIKKMEAWQVL  
KQLRHLNYTNNMGEKVHFGENADMEANYTIINWHRSAEDGSVVFREVGYYHMHARRGAKL  
LIDNTKIMWNGYSSEVPFSNCSD  
CEPGTRKGIIDSMPTCCFECTECSDGEYSNHKDASICTKCPNNSWSNGNHTFCFLKEIEFLA  
WSEPFGIALAICAVLGVLLTAFVMGVFVKFHNTPVVKASNRELSYVLLFSLICCFSSSLIFIGEP  
QDWSCRLRQPAFGISFVLCISCILVKTNRVLLVFEAKIPTSVHRKWWGLNLQFLLVFLCTFVQV  
MICVWVLYNAPPSSYRNHDIDEIIFITCHEGSVMALGFLIGYTCLLAAICFFFAFKSRKLPENFT  
EAKFITFSLIFFIVWISFIPAYFSTYGKVFSAVEVIAILASSYGMLACIFFNKVYIILFKPCRNTIEE  
V

>Tn\_4\_4\_YP

SALFLGLISLCDLSSAANLKASGNSLEEQVGLREDRTGAGAPFEKQCLOGSARLPAFSMAG  
DFVIGGVFSLHDFRVTEKPNYTTVPEPFRCSGRIHPAELOFSRAMVFAIEEINNSTELLPGIRL  
GYQIHDSCAAUPIAVHAAFQLLNGLDPVFDTDGNCSSQSGMVMMAVVGESGSTQSSISIRIIGSF  
DIPLVSHFATCACLSKQMYPTFFRTIPSDQFOADALAKLVKHFGWTWIGAVCSDSDYGNGG  
IAAFLHAAQKEGICVEYSETFYRTHPYSRIKRVADVIRRVSTAVVIVAFAPTEMRILLEELSREPP  
PPRQWIGSESSVTDPMRLRFSFCAGTIGFAI

>Tn\_16\_3\_Y

HETLFLFVTLVTLFLSAFTSIKAPSCKLWRTFNLNEMHKPGDVLLGG  
FQVHYSSVFPEWAFN  
EPQOPTCSGFDILGFRHVM  
MAFAIEEINKNSDLLPNVTLGYRLYDNCGLIVGFSGALSLASGQEEEFLODDCAGSPPVLG  
IVGDSPSTFTIASASVLGLYQLPMVSYFATCSCLTNRQRFPSFFRTIPSDAFQVQAMIQILKHF  
RWTWVGLLVSDDDYGLHVGRSFQSDLVQSGEGCLAYLEVLPWDGDPVEIRRVNVIKKSTAR  
VLMVFAHKFHVISLMNEVVRQNVTLGLQWLASEAWTGAAEIQTPOFMPYLRGTLGIAIRRGIT  
GLRDFLLQIRPEQISNITRNNMVQQFWEYSFQCKFGGSNSSEACRGDEDIERVDPEFLDVSN  
LRPEYNIYKAVYALAYALDDLLRCEPGRGPFSEHSCADIHRLKPWQLVHYLQHVNFSTTFGD  
QVSFDQNGDVLPIYDIVNWLWFPDGRVKVQNVGEVKRTLLRGDEVTLHGDKIFWSFEYNKP  
POSVCSQSCPPRTRVSRKQGPVCCFDCLTCSEGKFSNKTNSMECTSCPEDFWSSSQRD  
HCVPKKTEFLSYHDPLGICLTVASLLGTVISAVVLGIFIHHRSTPVVRANSELSFLLLVSILKCF  
LCSLLFIGRPRWLWTCQLRHAAFISFVLCVSCILVKTMMVVLAVFSASKPGGVAILKWFGAVQQ  
RMTATILTFIQVAICILWILLASPFPRKNTQYSNEKIVYECAIGSTVGFSLLLSYIGFLAILSCLIAF

YSRNLPDSFNEAKLIAFSMLIFSAVWVFPAYISSPGKYADAVEVFAILASSFGLLVTLFGPKC  
YIILLRPERNTKKAIMGRV

>Tn\_16\_4\_PY

HETMFLFVTLVILFLSAFTSIKAPSCKLWRTFNLNEMHKPGDVLLGGLFKVHYRSIFPEWAFT  
SEPOOPTCSGFDILGFRHVMTMAFAIEEINKNSNLLPNVTLGYRLYDNCGTLIVGFSGALSLA  
SGQEEEFPLQDDCAGSPPVLGIVGDSYSTFTIASASVLGLYQLPMVSYFATCSCLTNRQRF  
SFFRTIPSDAFQVOAMIQILKHFRWTWVGLLVSDDDYGLHVGRSFQSDLVQ  
GKGCLAYLEVLWGRDPVEIRRTVNVIKKSTARVLMVFAHEFHMIPLMNEVVRQNVGTGLOWL  
ASEAWTGSAALQTPQFMPYLRGTLGIAIRRGEITGLRDFLLOIRPEQISNITRYNIVQQFW  
YSFOCKFGGSNSTEACRGDEDIERVDPEFLDVSNLRPEYNIYKAVYALAYALDDLLRCEPGR  
GPFSEHSCADIHRLKPWQLVHYLOHVNFSTTFGDQVSFDQNGDVLPIYDIVNWLWFPDGRV  
KVQNVGEVKRTLRLRGDEVTLHGDKIFWSFEYNKPPQSVCSQSCPPGTRVSRRKQPVCCF  
DCLTCSEGKFSNKT

>Tn\_15\_2\_Y

SRIFTLLLGFGGRELGRGGLLQLVQAQTCTQWSTPSEPGLFQDGDVVVGGLFNLHYKPPDT  
THSFTQQPNYKPCCTGVSFLISGLENLPLOQIYAMVFAVEEINHSSSTLLPGVKLGFHIRDSCALH  
PWTTQAALCLVGGDNASCYFSTPSGYSPEIVEKKGADSVPLIIGGASSNAAKILLSTLSPLSV  
PLISYTASCPCLSDRRQYPTFFRTMPSDIYQAQAVAQLALRFNWTWIGAVVANNDYGLMAVK  
VFQEETQGKGVCLAFVETLQRETIVSDARRAALTIQASTAKVILVFSWYTDVREVFYQLHKMN  
VTDRQFLASEAWSTSEVLLKDPITSRVSSGVGVVAIASEHIPGFNGFLRGLNPSLRPWDQFL  
QEFWEQEFGCSPSPPPNVTGHLKASLPPCSGAESLEERQHPFTDTSQLRVTYNVYLAVYAA  
ANALHSLLSCPGHNSPPGSSNCTSSKSIKPTELLOHLSRVNFTTPOGELLYFQGADIPAKYD  
LINWQRGADGTLKLVLIGRVAGFDLRLDGSAIEWSTRNNEVPVSVCSSESCPPGTRKANRKG  
EPLCCFDCIPCADGEISNTSGSLOCERCPEFWSNDGRTACAPRQLDFLSFNETLGITLTTVA  
VSGAVVTTAVFVVF

HYRHTPMVRANSELSFLLLVSCLKCLCSLVFI

RPSVWSCRFOQAAF

ISFVLCVSCLOVKTIVVLAAFRSARPGASALMKWFGPSQQRGSVCIFTFVQARVIICIIWLSLS  
PPVPOADLDMPGLQVTLECAMASVVGFSVLVGYIGLLACTCLLLAFLARKLPDNFNEAKLITF  
SMLIFCSVWVAFVPAYISSPGKYSAVEIFAILASSYGLLFCIFAPKCFIILLRPEKNTKKHLMMR

>Tn\_15\_1\_F

SPTWLLFCLCVGGHVGLNVVSTVLC SHWGQRSDRNLSVDGDVMIGGLFNLYYIPSAIQOEY  
TQLHPYERCSSLDIESLKNMYAMVFTVEEINRDATLLPGVRLGYRIRDTCSTRYPWALDGALSL  
VTGGLSSCNMTASSTDSVGGKMAADEKVPLLIGPASSTTGIMLSSILOTLSVPIISFLASCPC  
LSDRTKFPTFFRTIPSDIYQARAMAQLAIRFHWTWIGAVVVNNDYGQLAIQMFQEEIRGKEICL



EFIETVYRETVMTDARRIALTVQAATTRVILIFCWYKDAKEILLELAKRNVGTGRQFLASEAWSTS  
EELLOELAISEVANGVLGVAIOSSTIPGFEHFLRSLNPIHRPNDVFLRDLWEMEFKCSPPSSFS  
NASLPPCSGTESLVEMKHPFTDTSQLRVAHNVYLAVYAAAYALHSLLCFPGQDSPPGKPNC  
TSPHHIQPIDVLOHLNKVNFTTTPRGETFYFQGSDLTTRYDLVNWQKTPRGPLKLALVGRVDG  
FNLMLNESAIHWSTGLNQVPVSVCSSESCPPGTRKANRKGEPLCCFDCIPCADGEISNTSGS  
LOCERCPEFWSNDGRTACAPRQLDFLSFNETLGITLTTVAVSGAVTTAVFVFLHYRHTPM  
VRANSELSFLLLVSLLKLCFLCSLVFIGRPSVWSCRFOQAAGISFVLCVSCLLVKTLLVLAUF  
RSAOPGSRATKWFGPSQQRGSVCLFTSIQIIICTVWLSVSPNPDRNLGFOGSKVTLECAMA  
SVVGFSVLVGYIGLLACTCLLLAFLARKLPDNFNEAKLITFSMLIFCAVWVAFVPAYISSPGKYV  
VAVEIFAILASSYGLLFCIFAPKCFIILLRPERNTKKDMMMSRT

>Tn\_V2R2\_F

ARLFLLPLVCLWLLHLRVSADSTCKLKAKFNLSGYKSVEKKTVVVGGMFPVHMRVASSGRN  
TSRVPVSSGCEGFNFRTFRWTRTMLFAIDEINRRSDLLPDTDLGYVIYDSCFTISKAVEGTLTY  
LTGQDEAVPNYRCGSGPPLAALVGAGGTDLISIATARILGLYHFPOVSYCSTCSALESKFQFPT  
FLRTVPSDQHOSSAIAKLVIGFGWTWVG  
ISANDDYGKYGIKDFKEQVEEAGVCISFSETLPKGNPEDIQRIVQTVVESTAKIIVFSSDVDL  
SPLVAELLRNNVTNRTWIASEAWWTSALLLEPGASSLLGGTLGFAVRRGSIPGLQRYLLDLDL  
YGDPLTEEFWETVFNCTLDYGKALRQSGQGLCSGLESQAQLNNTYSDISQLRITYSVYKAVY  
AVAHALHNLEHCQOGQGFNGKDCADIGSFEPWQLMYLKNVRYT  
PHTGEEVFFNDGTVEAFYDLINWQFSSDGEISYVRVGHFNASAAPEEQMSISNSSILWNNDT  
PEPPRSVCSDNCOGTRKGIROGEPVCCFDCIPCADGEISNTTNARECILCGEDDWSNOAH  
DACVPKIIIEFLAFGEPLGITLIVISACGAVVTIAVAVFILNASTPLVKANDAVLSLLLLFSLVVTFL  
CSIVFLGEPQDWSCMTSQVALALGFALCLSCIMTRSCRREIWRCLIPQAVACTVWLVLFP  
HAVKNTSAQNIKIILECDEGSIVFICCFAYDILLALIAFIFAFIARKLEDHFSEGKSMFTGMLVFFI  
VWISFVPAYLSTRGKFMVAVQIFAILASSFGLLTCIFLPKCYILLIKPERNKEDMMMRP
